# Supplementary material
Source: MDPI journal article supplement (https://www.mdpi.com/2227-7390/7/12/1156)

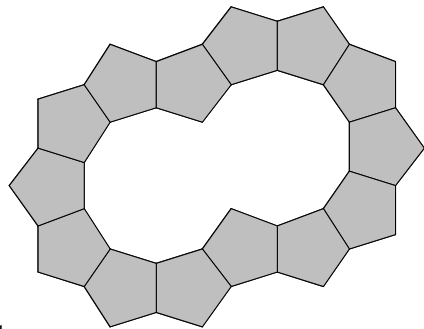

1

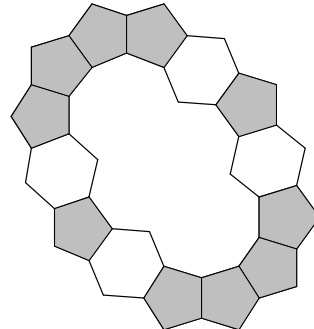

2

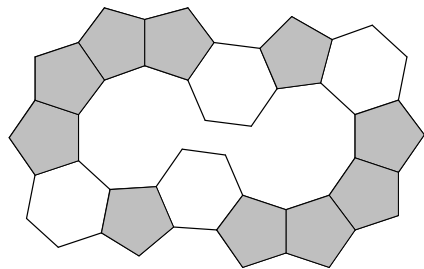

3

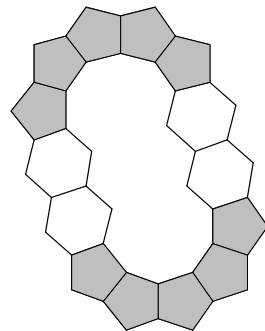

4

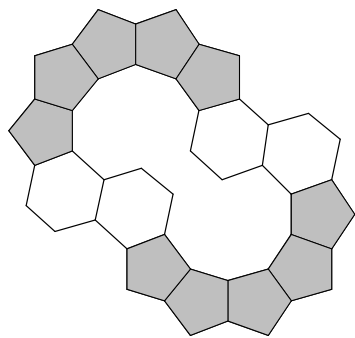

5

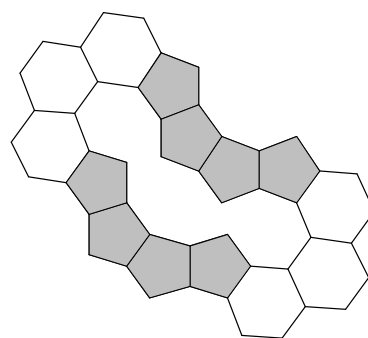

6

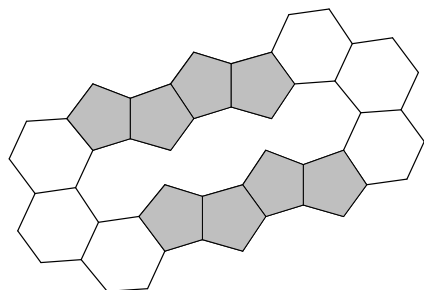

7

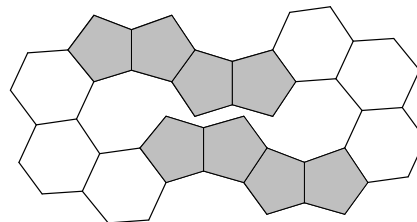

8

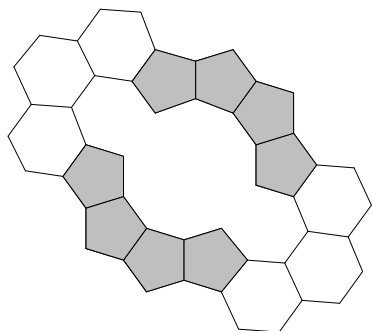

9

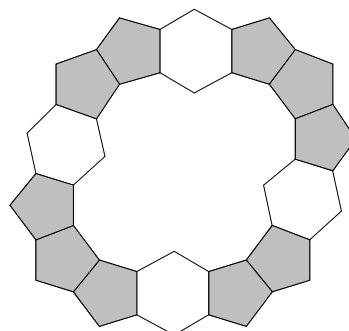

10

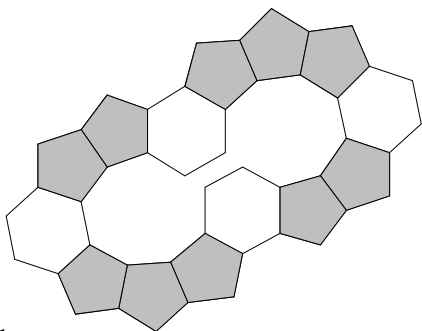

11

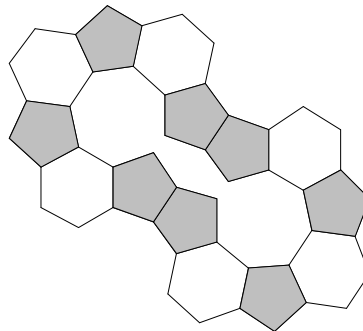

12

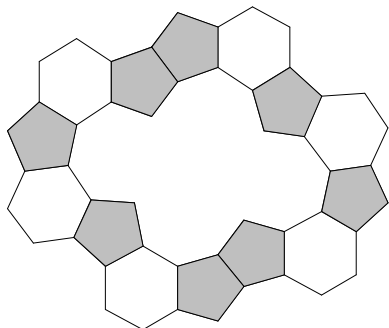

13

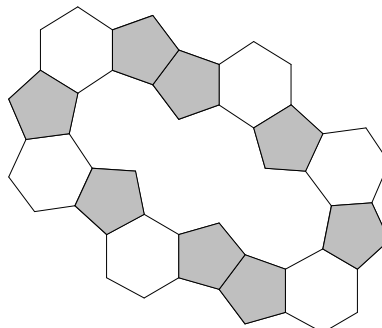

14

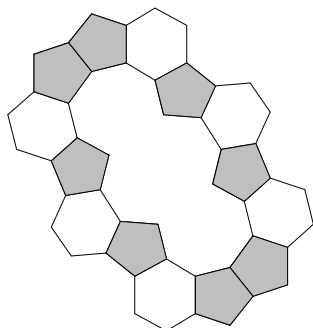

15

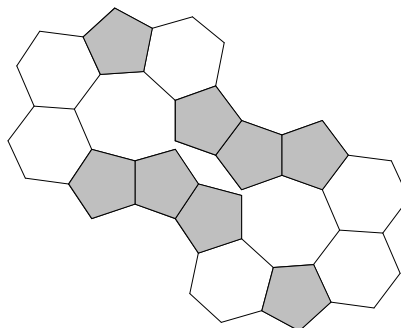

16

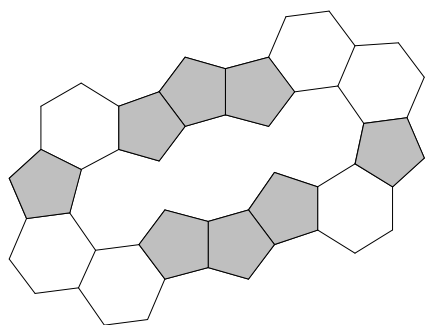

17

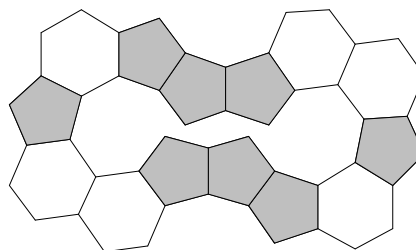

18

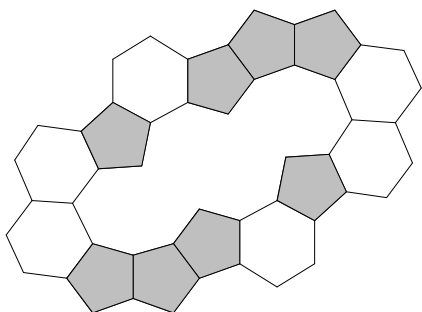

19

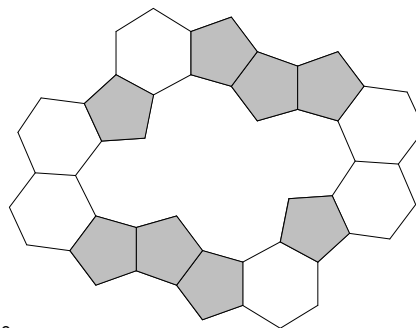

20

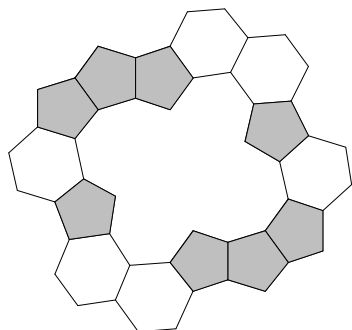

21

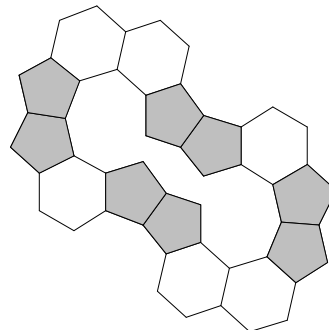

22

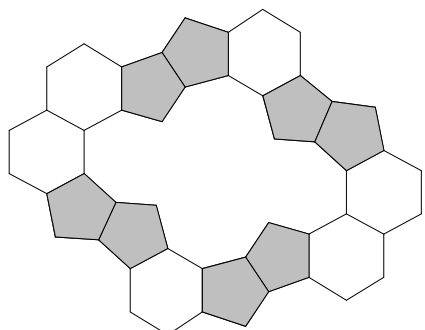

23

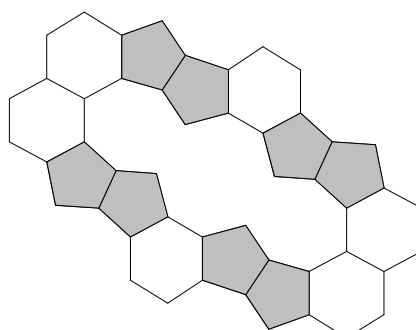

24

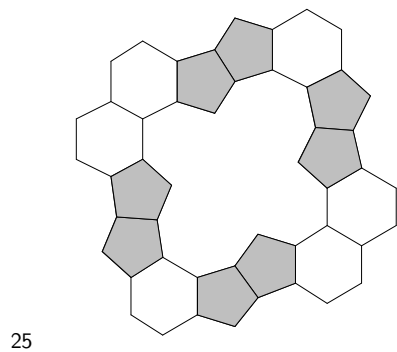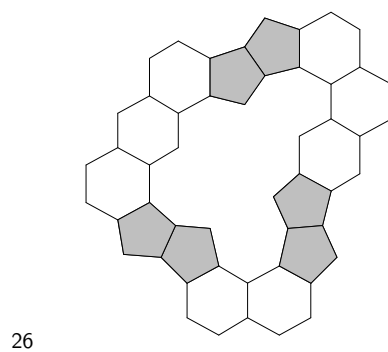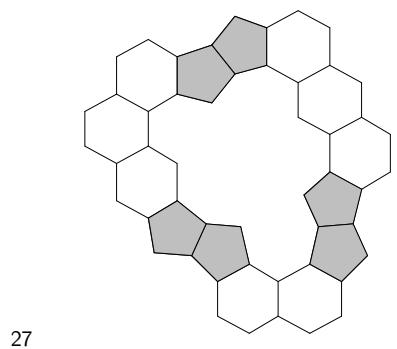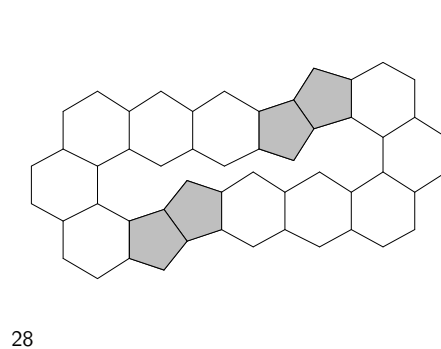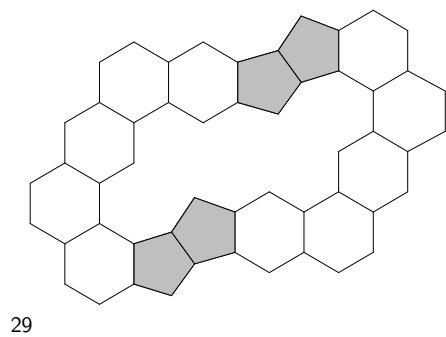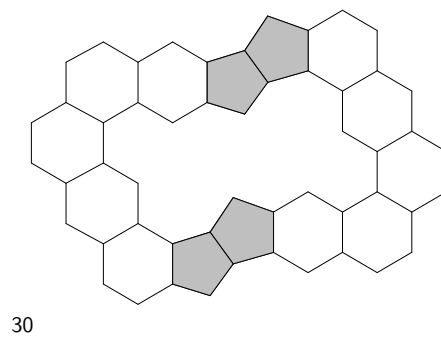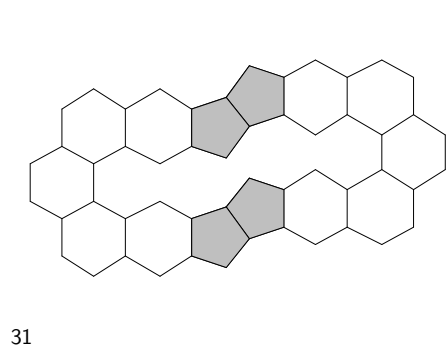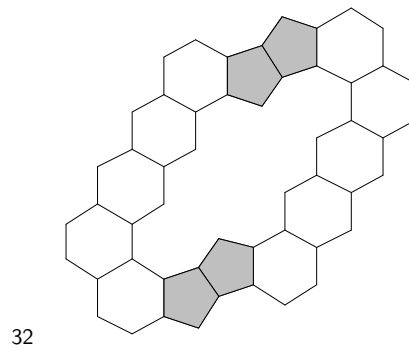

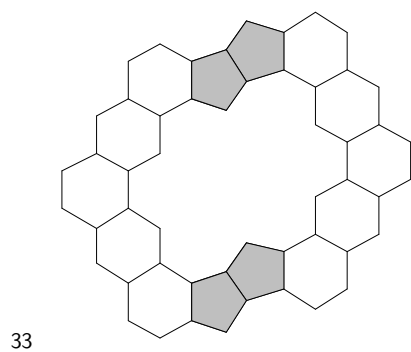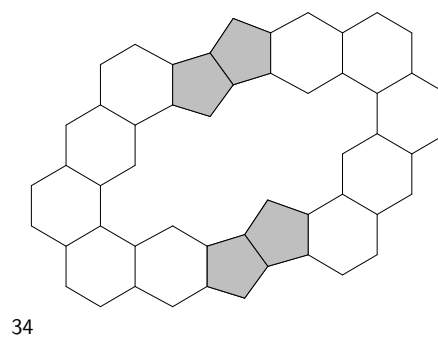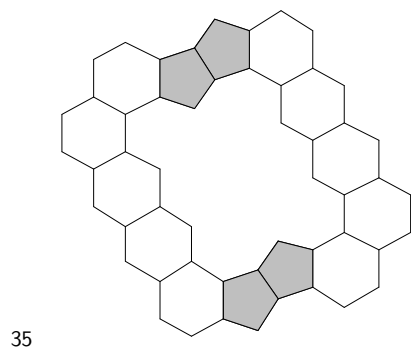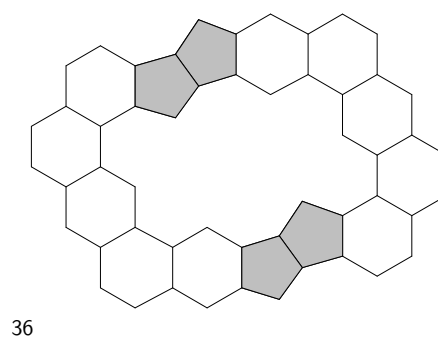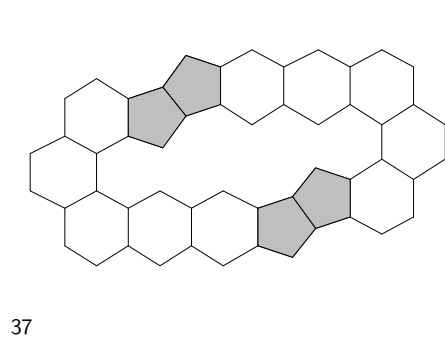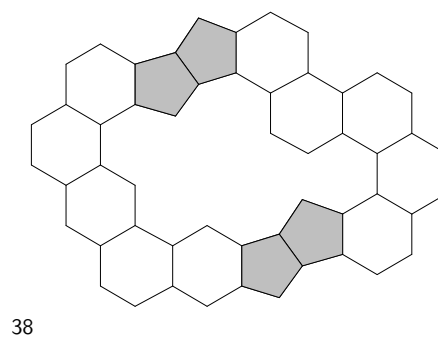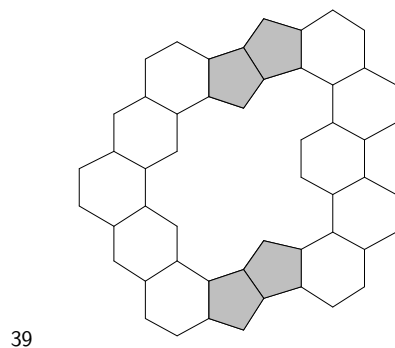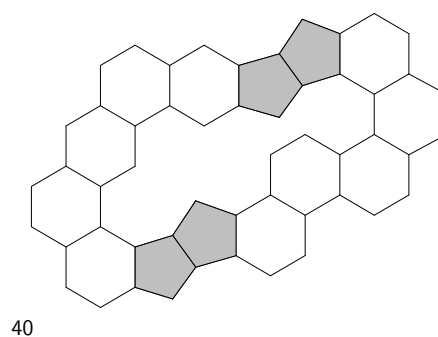

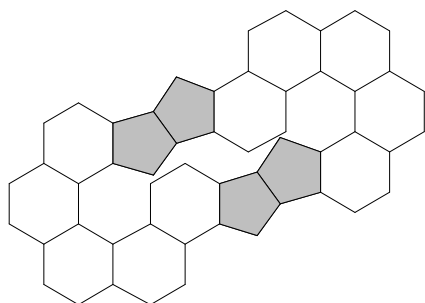

41

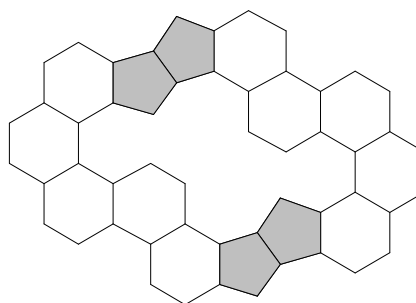

42

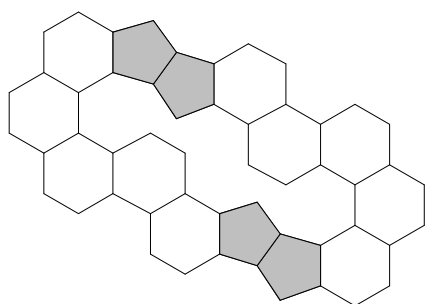

43

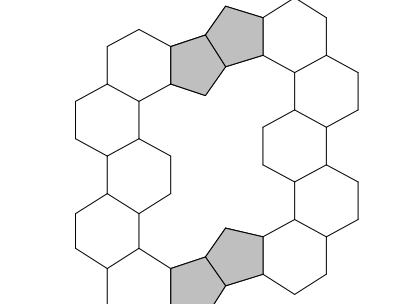

44

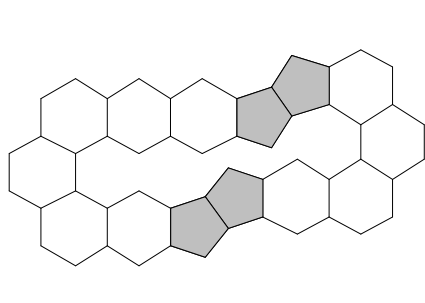

45

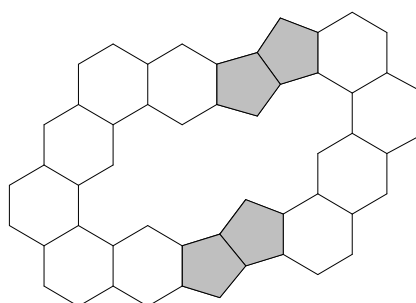

46

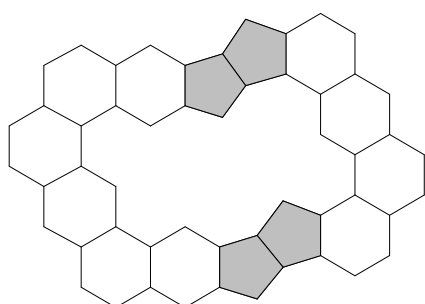

47

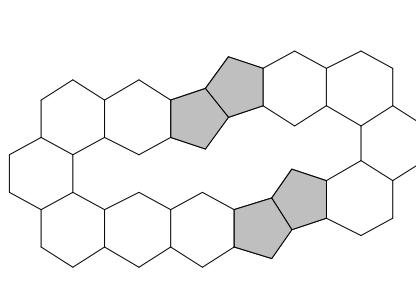

48

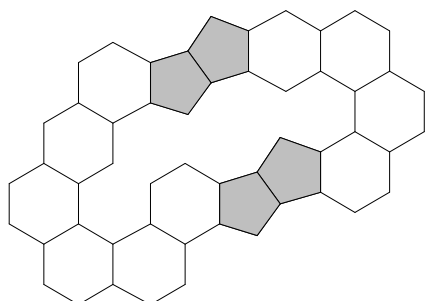

49

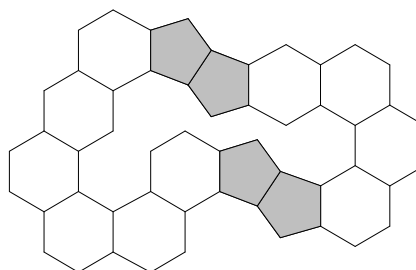

50

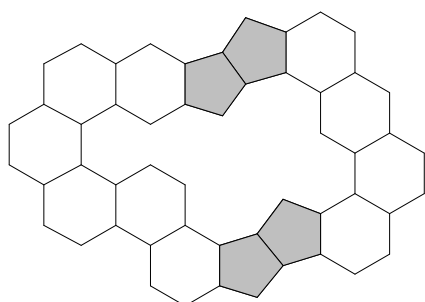

51

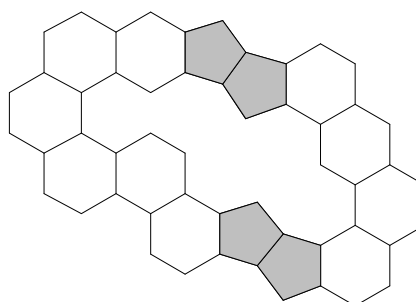

52

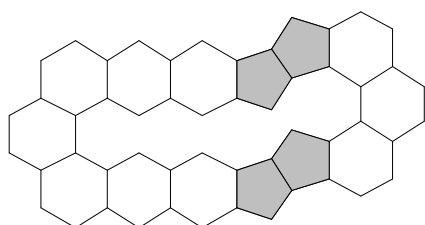

53

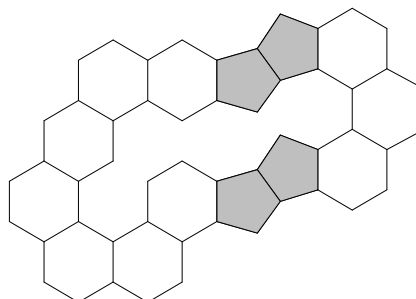

54

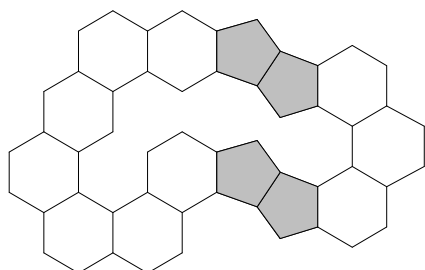

55

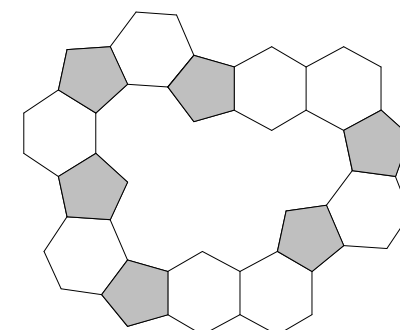

56

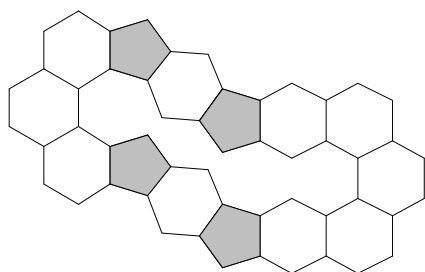

57

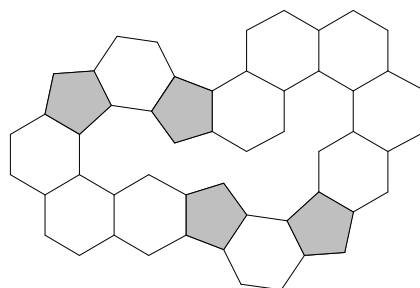

58

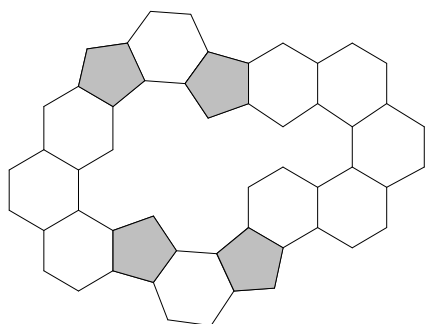

59

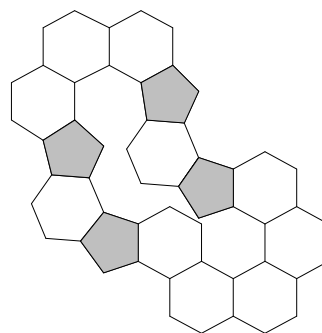

60

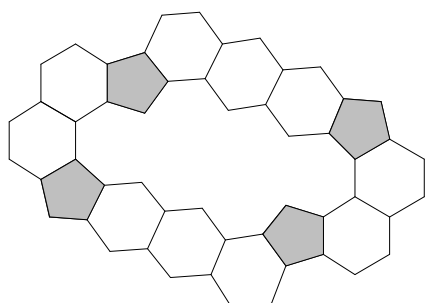

61

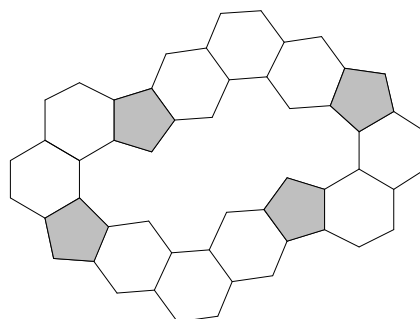

62

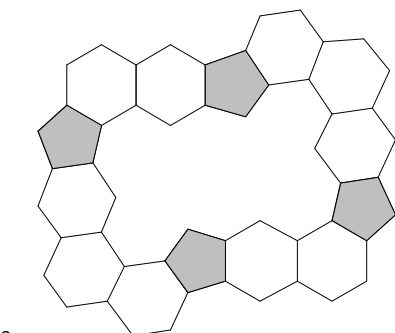

63

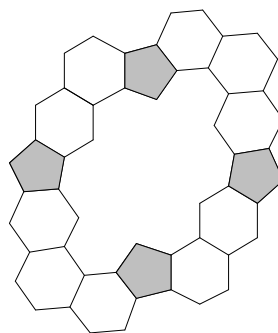

64



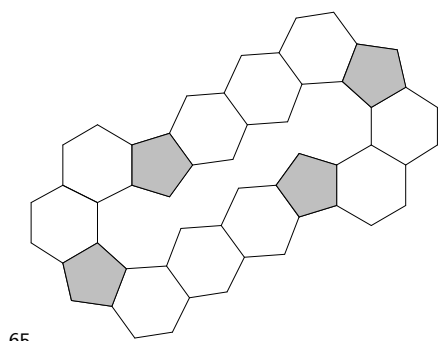

65

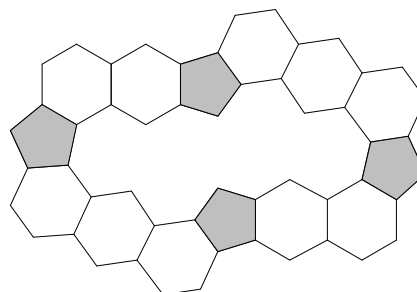

66

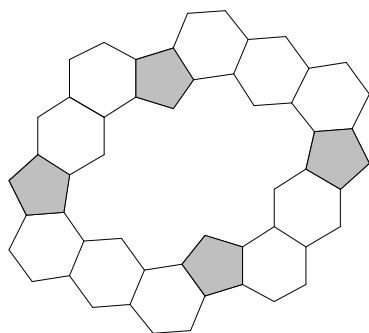

67

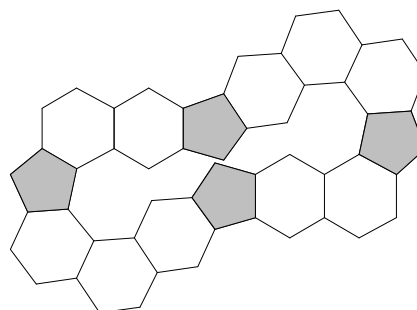

68

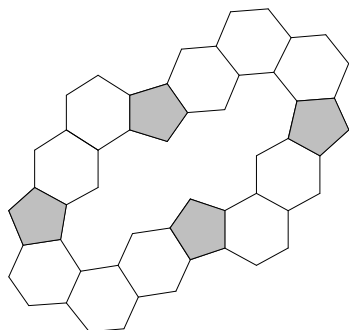

69

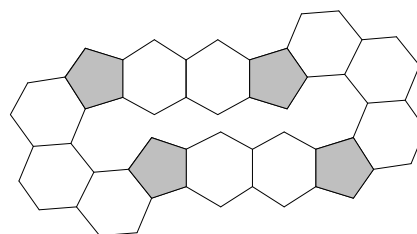

70

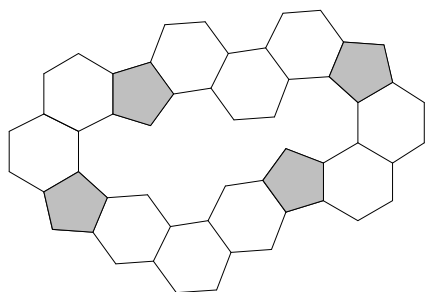

71

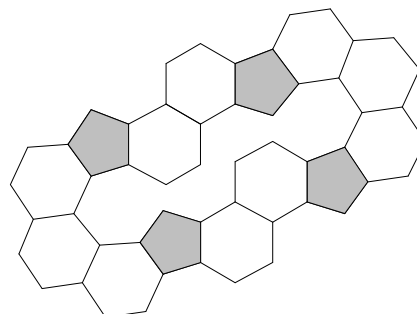

72

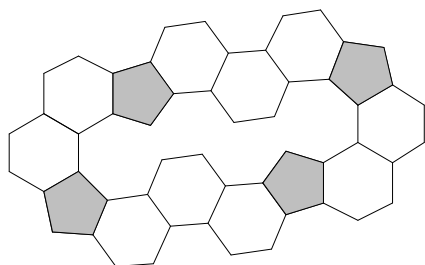

73

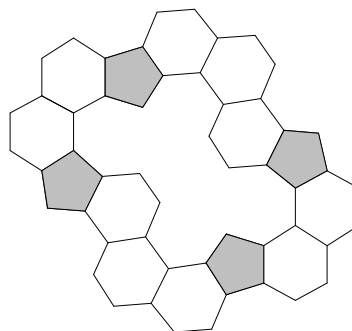

74

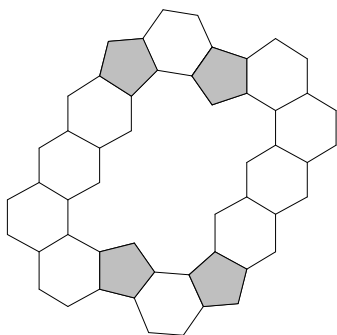

75

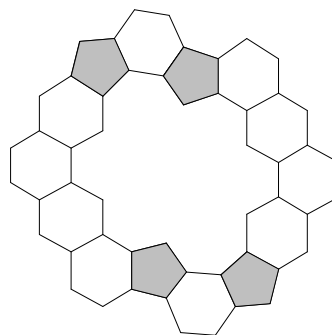

76

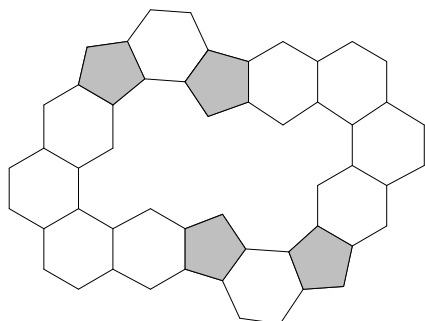

77

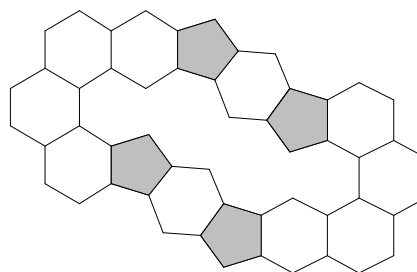

78

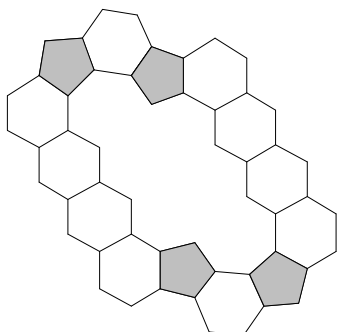

79

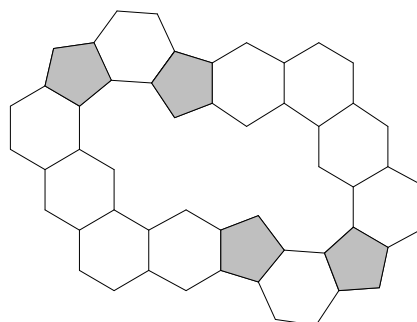

80

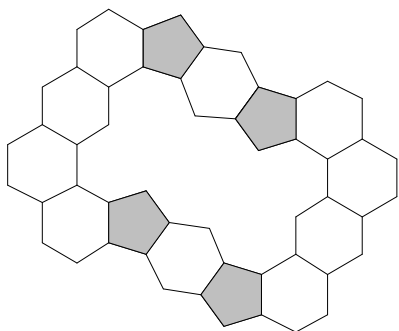

81

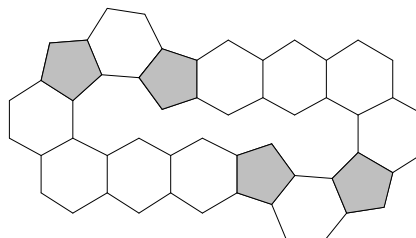

82

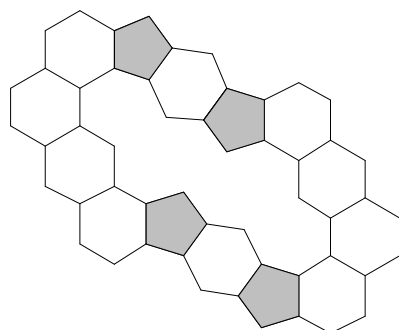

83

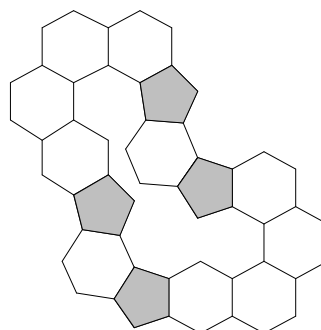

84

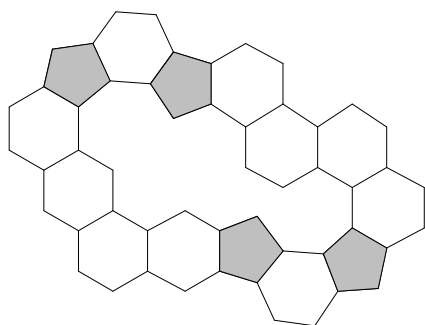

85

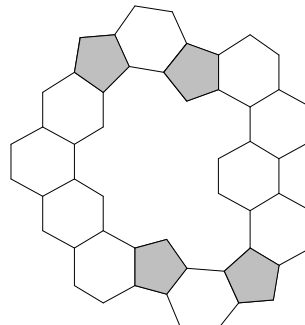

86

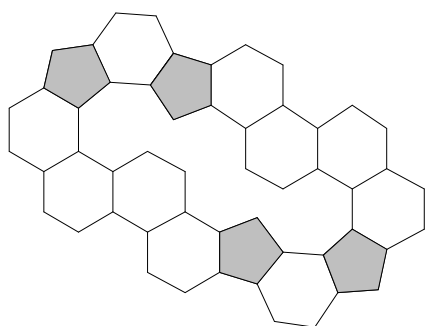

87

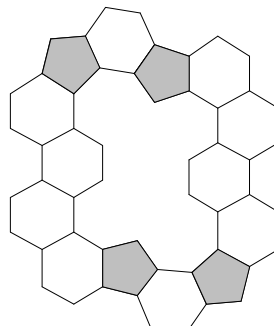

88

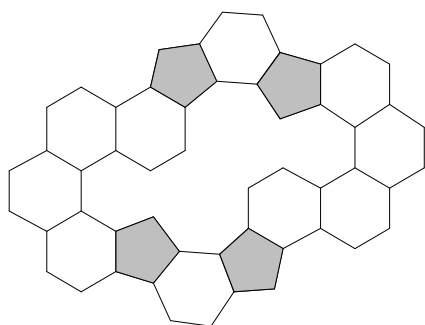

Supplement: s1 [file s1]

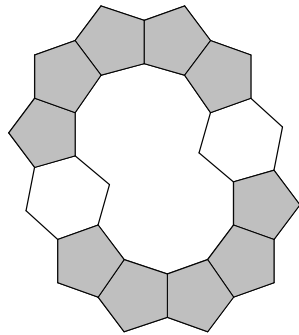

1

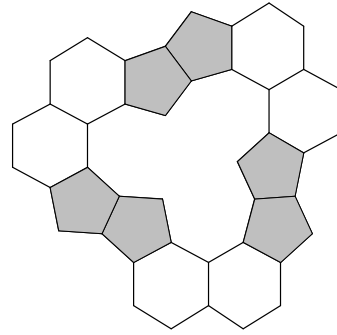

2

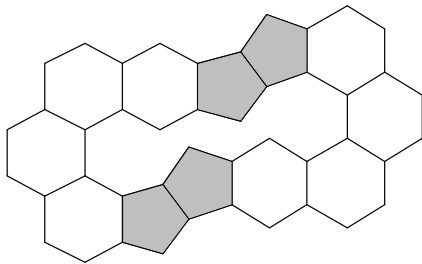

3

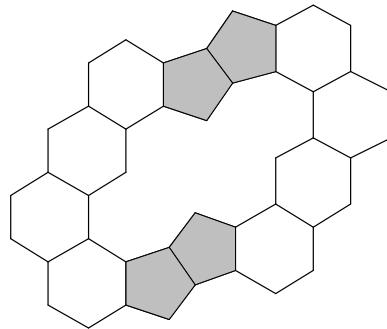

4

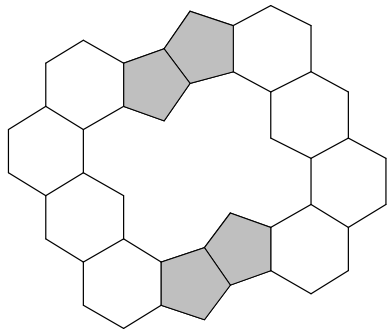

5

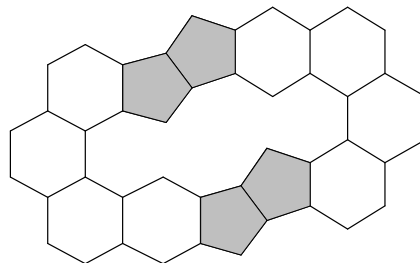

6

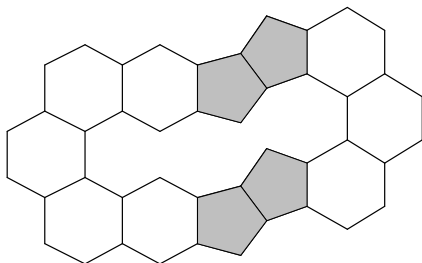

7

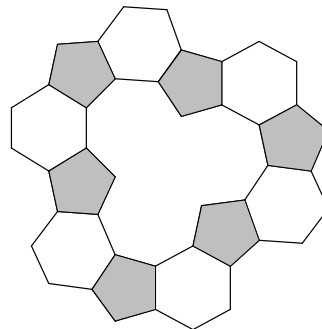

8

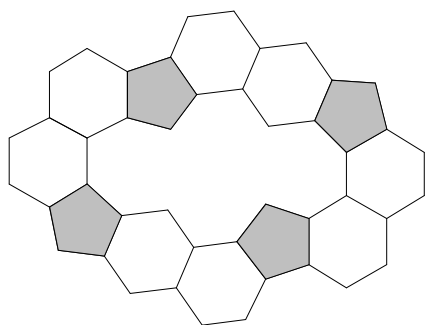

9

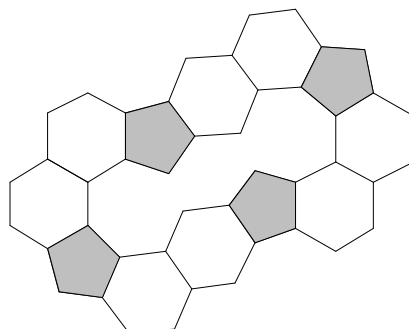

10

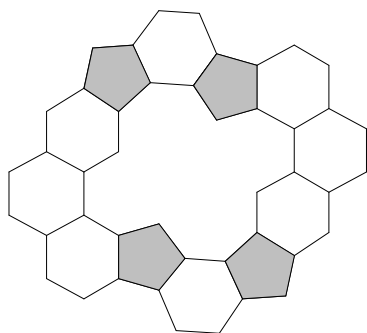

11

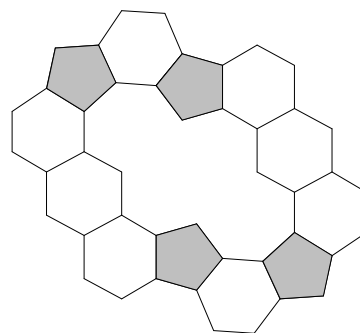

12

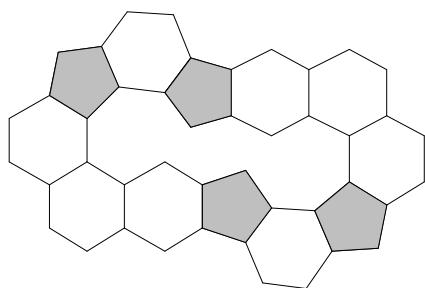

13

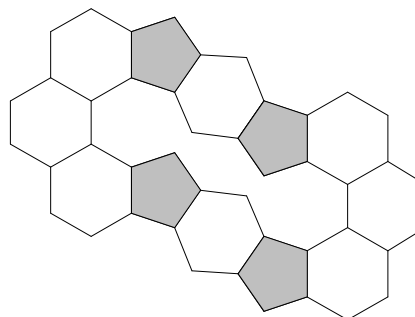

14

Supplement: s1 [file s1]

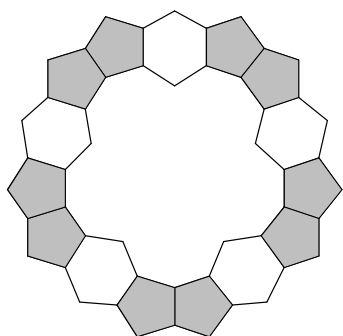

1

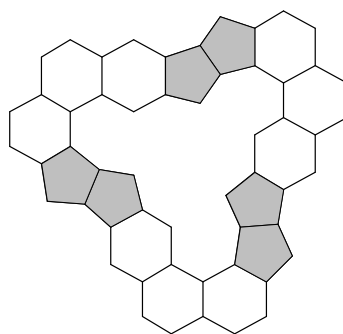

2

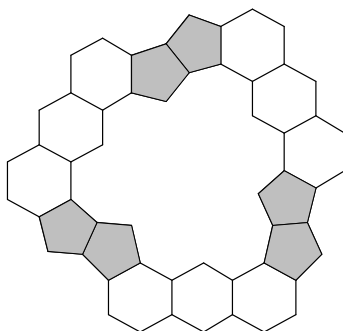

3

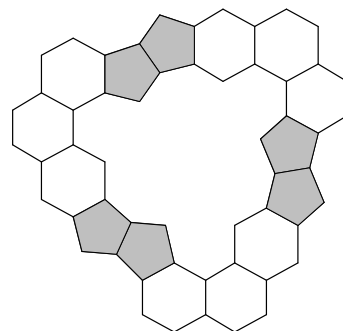

4

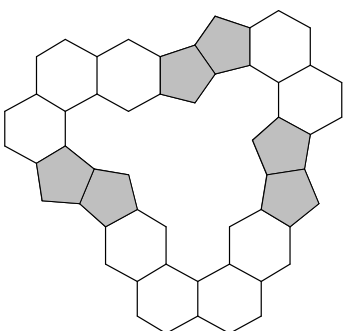

5

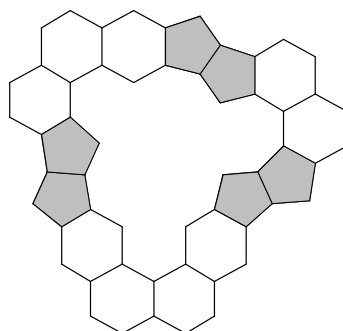

6

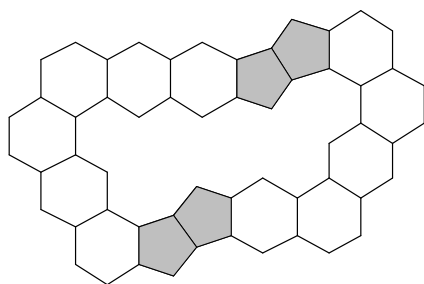

7

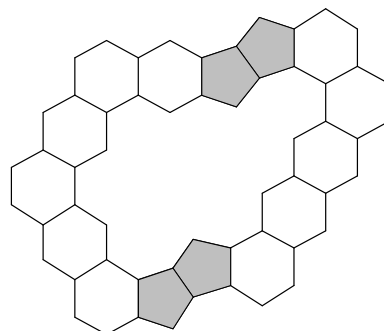

8

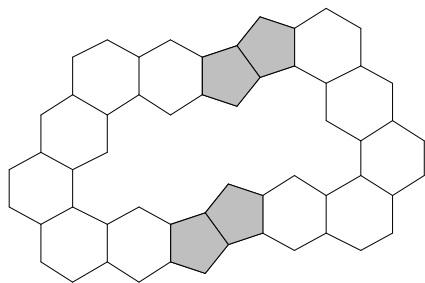

9

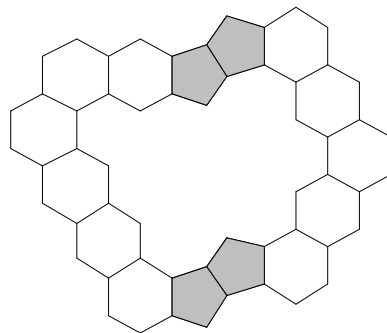

10

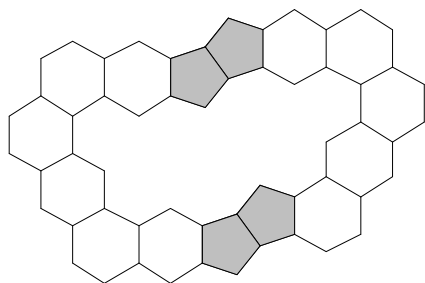

11

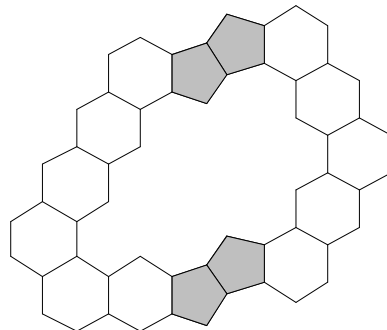

12

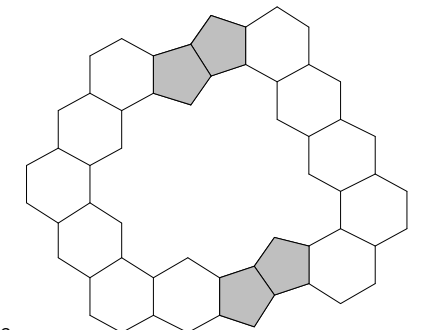

13

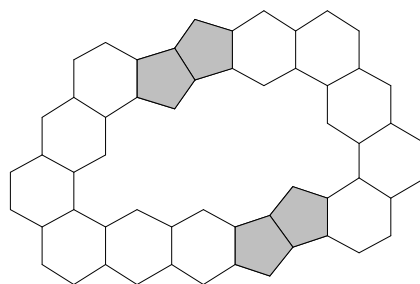

14

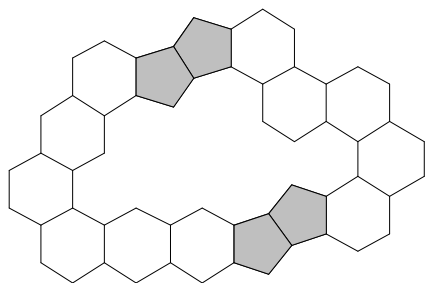

15

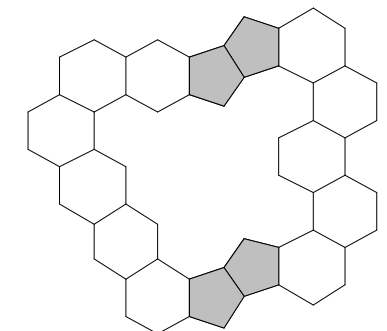

16

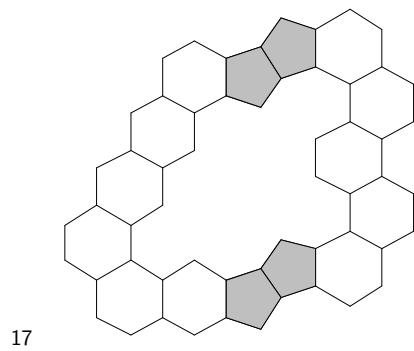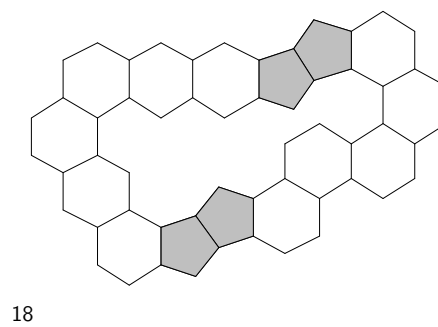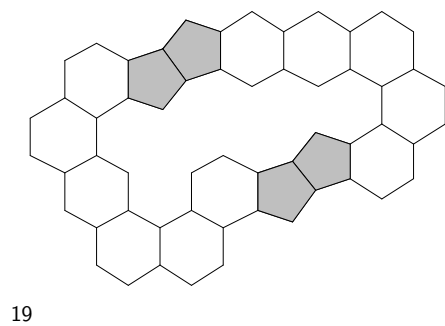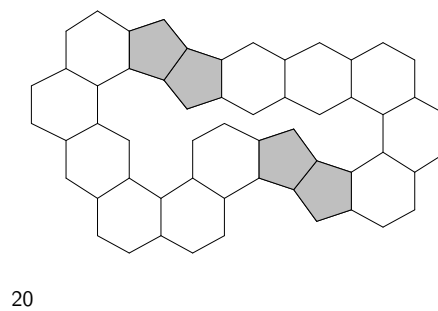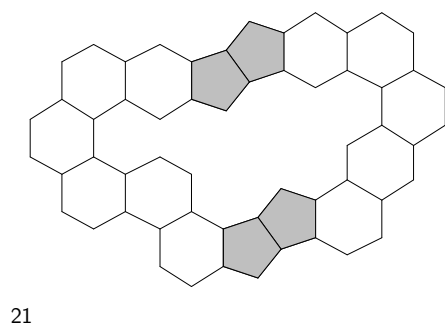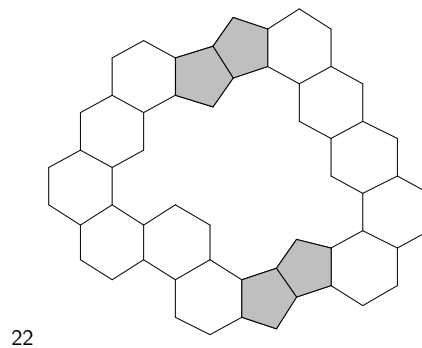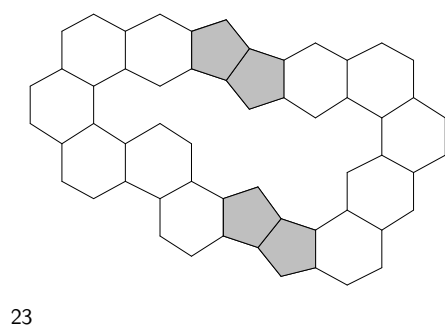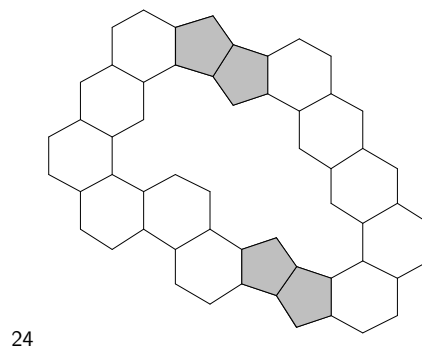

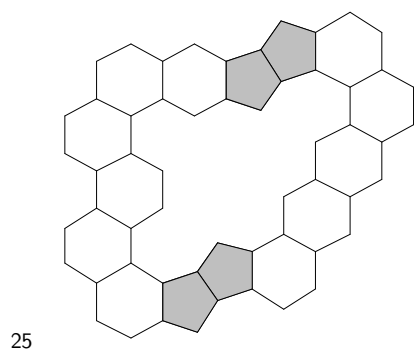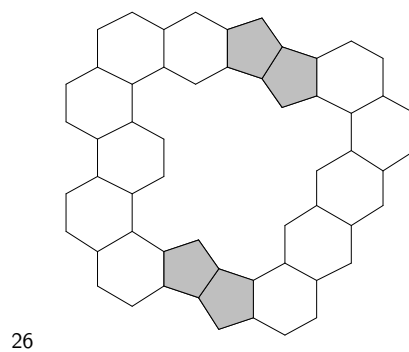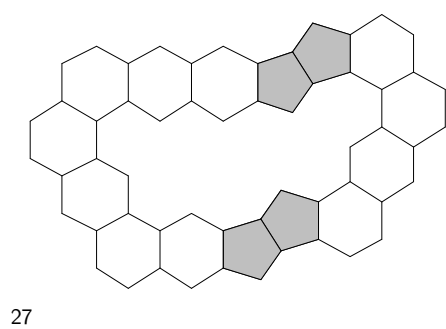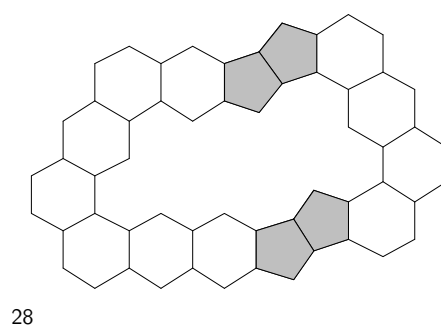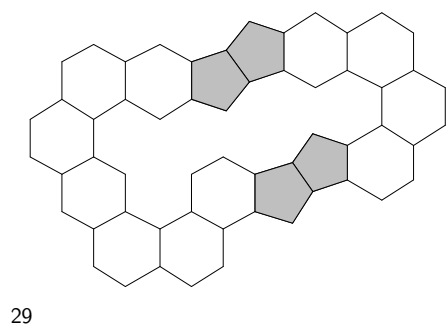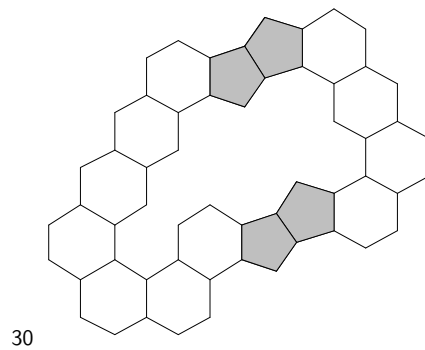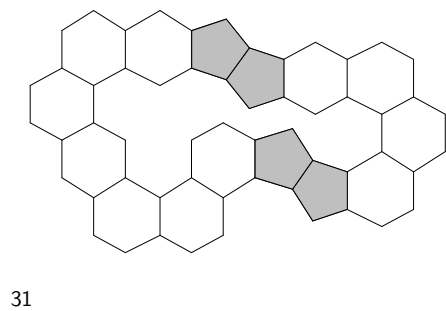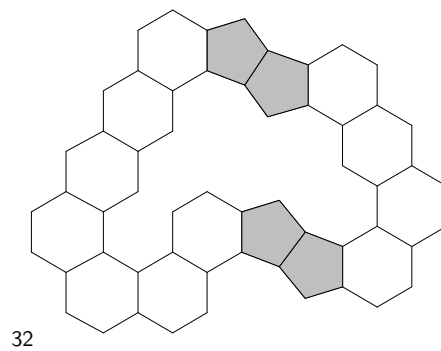

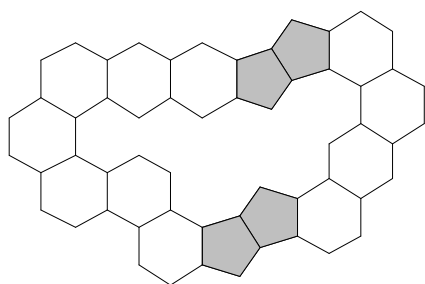

33

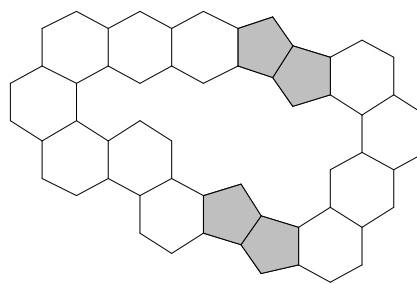

34

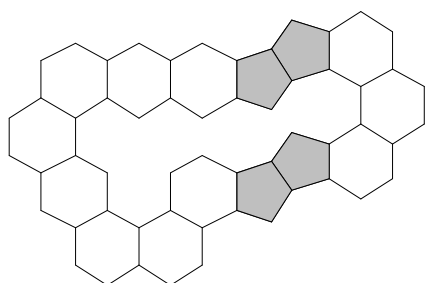

35

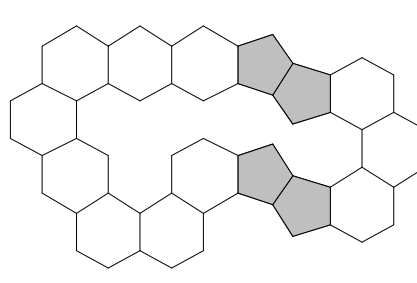

36

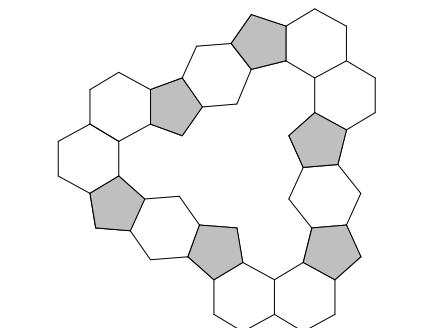

37

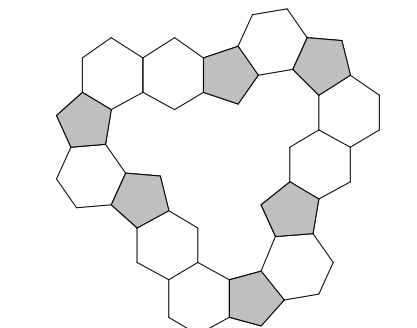

38

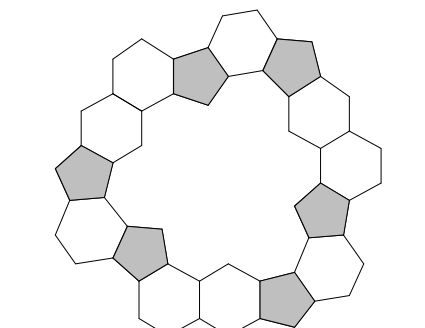

39

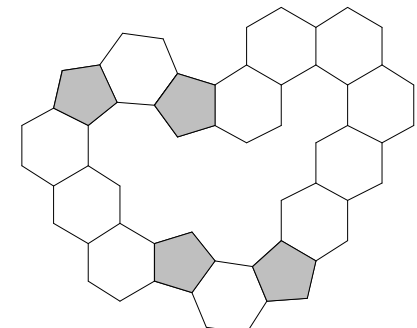

40

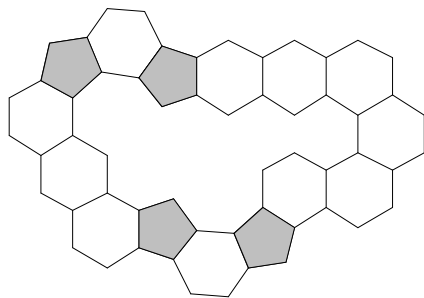

41

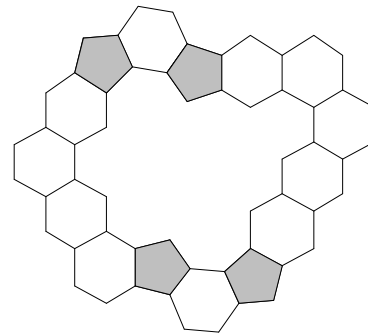

42

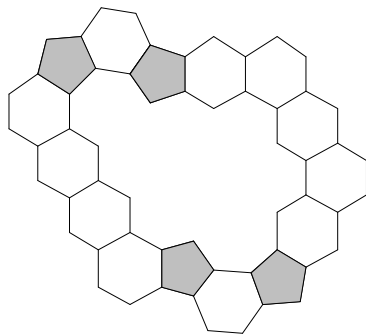

43

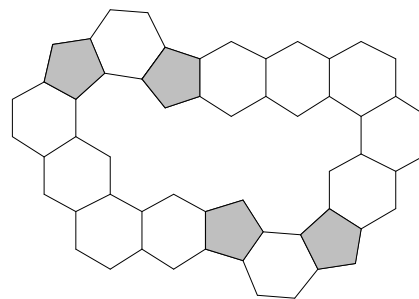

44

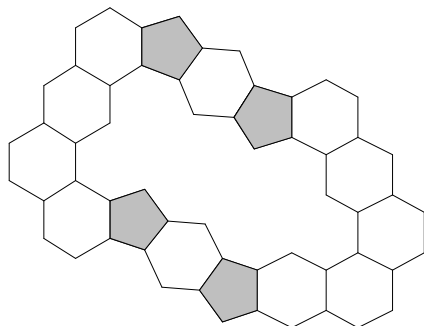

45

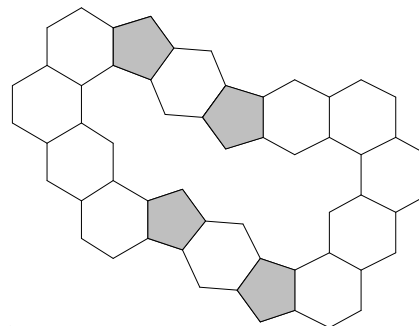

46

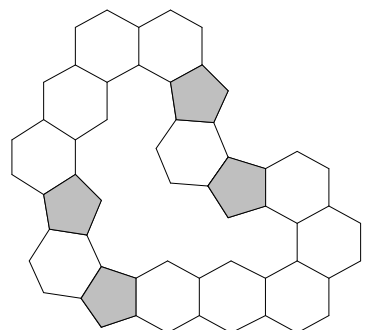

47

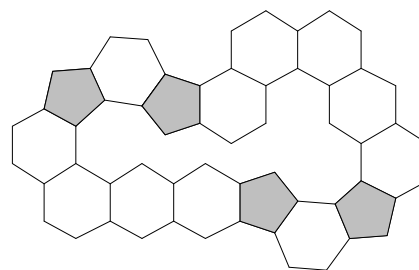

48

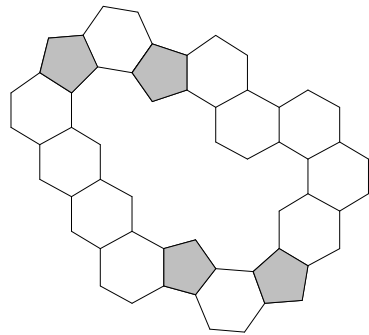

49

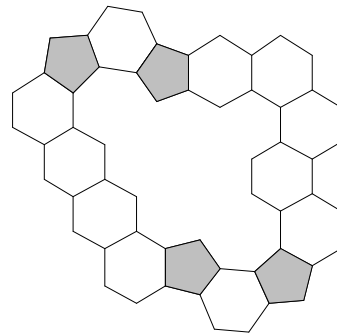

50

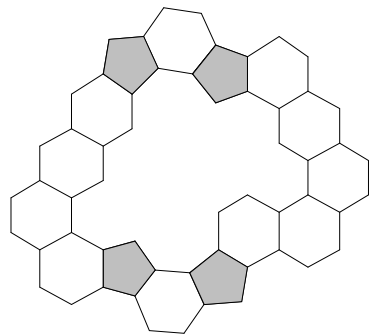

51

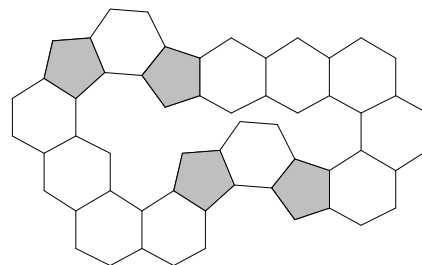

52

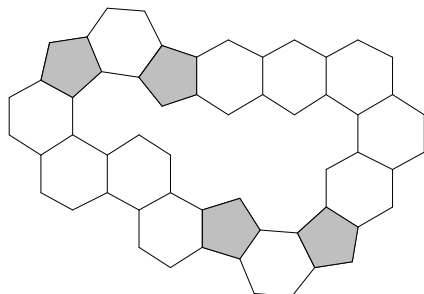

53

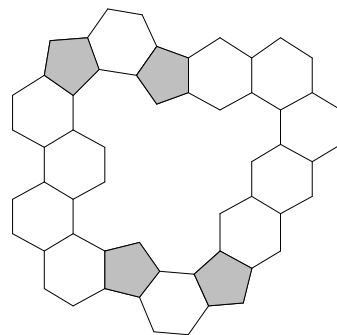

54

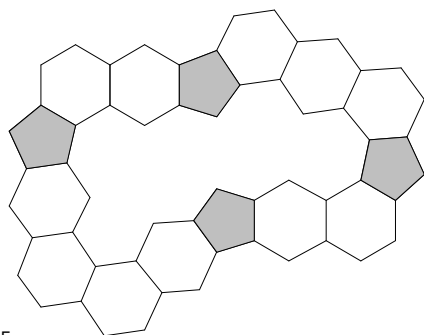

55

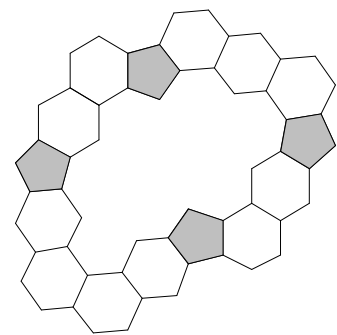

56

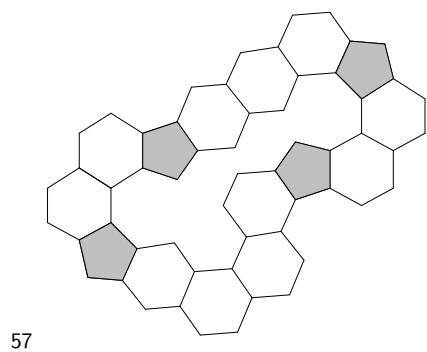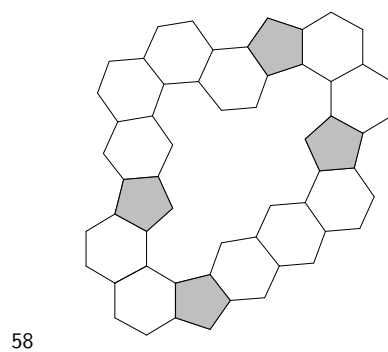

Supplement: s1 [file s1]

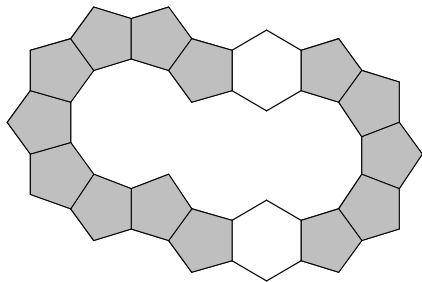

1

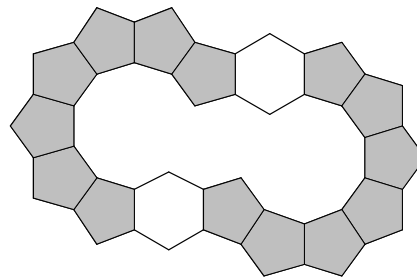

2

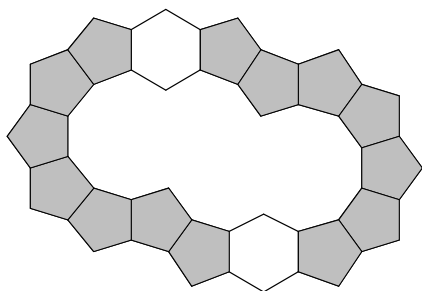

3

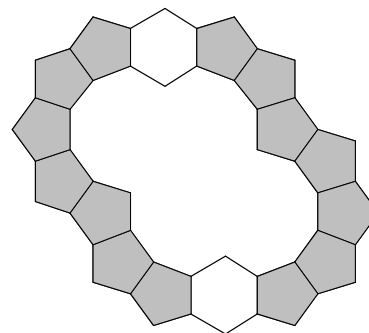

4

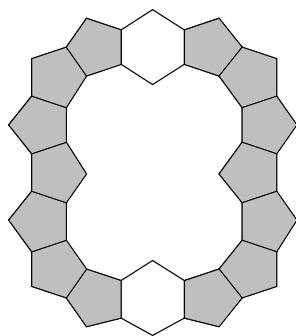

5

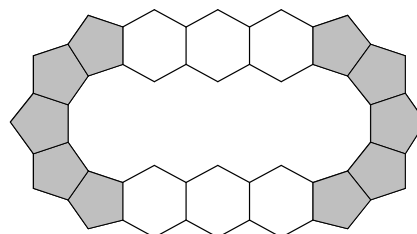

6

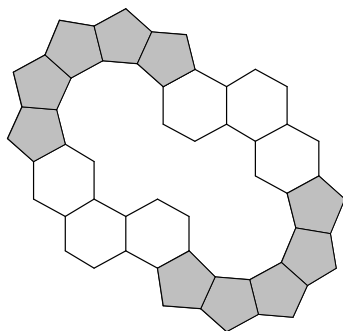

7

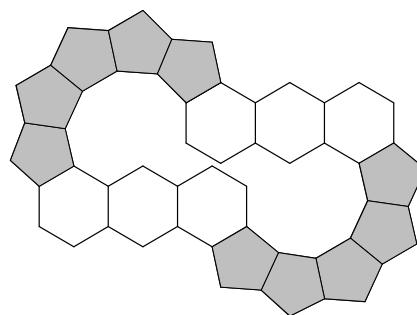

8

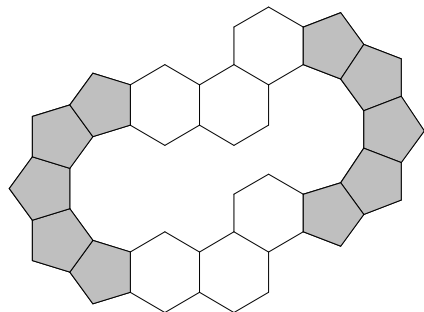

9

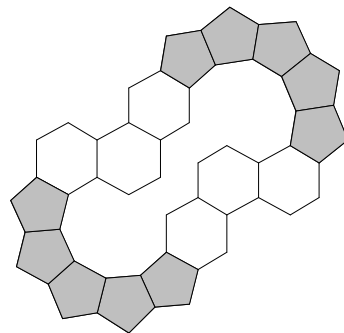

10

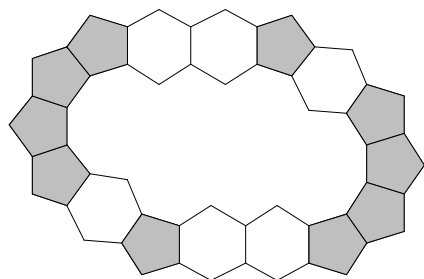

11

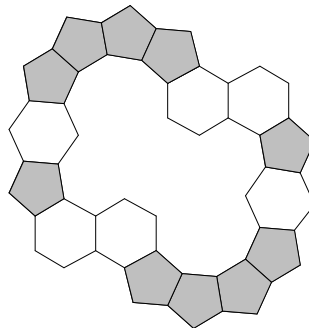

12

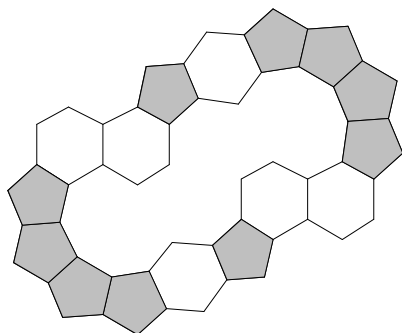

13

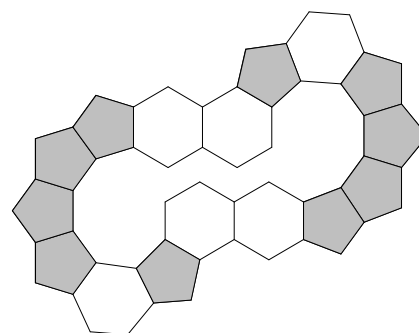

14

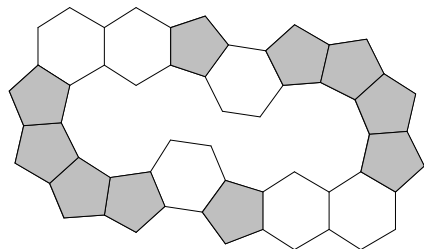

15

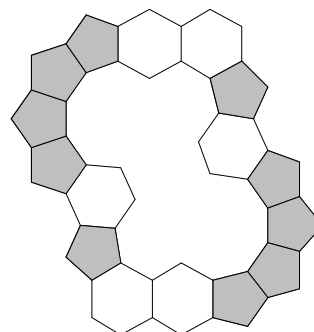

16

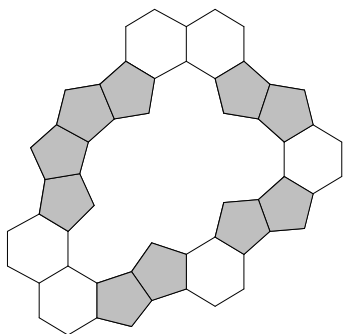

17

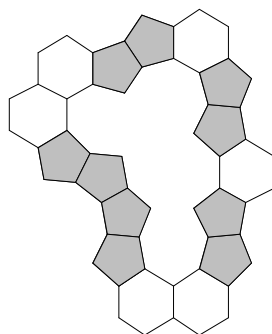

18

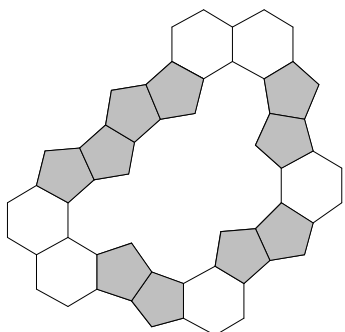

19

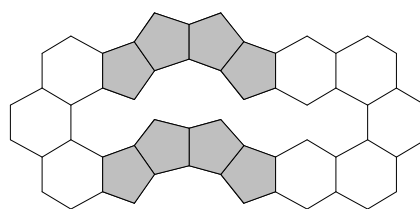

20

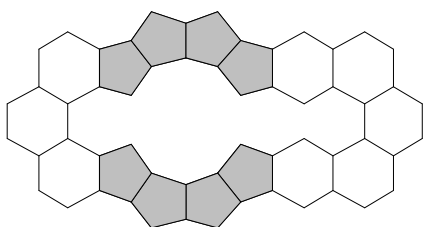

21

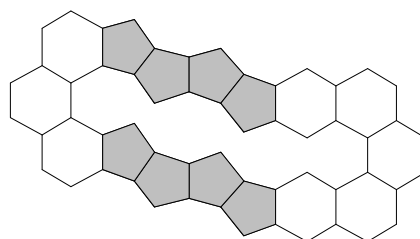

22

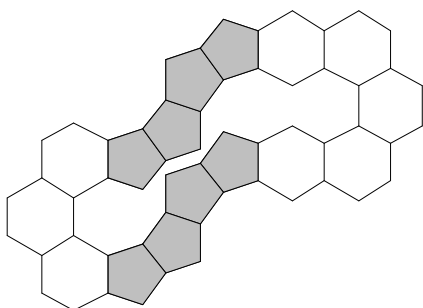

23

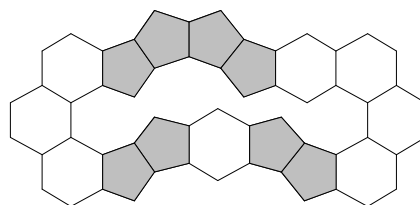

24

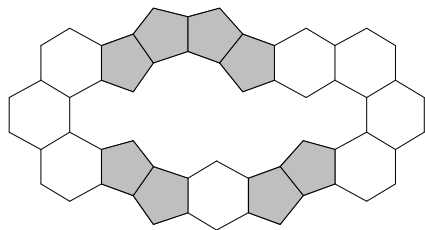

25

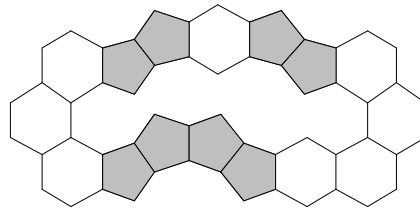

26

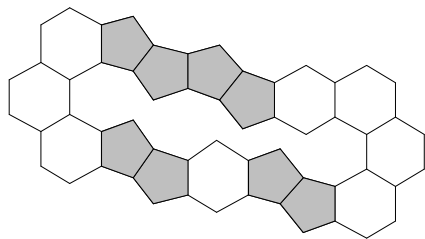

27

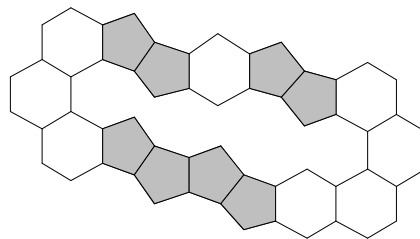

28

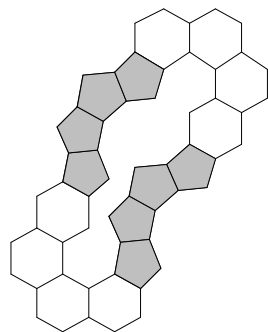

29

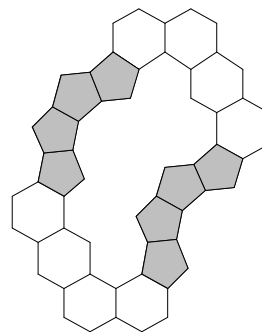

30

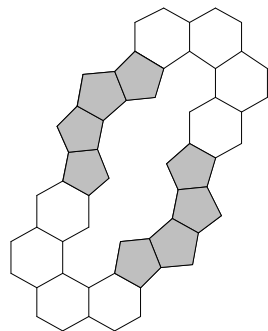

31

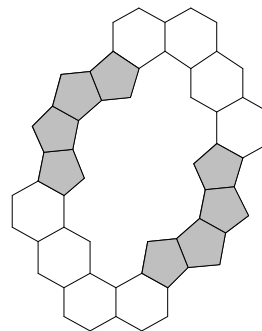

32

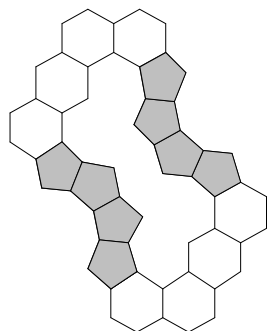

33

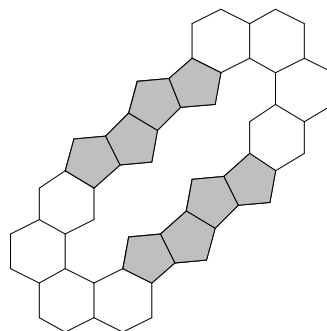

34

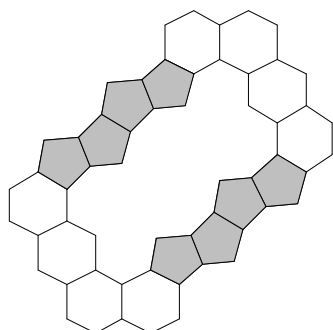

35

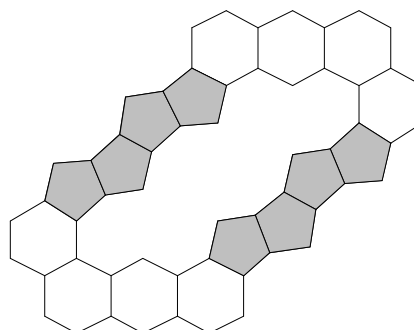

36

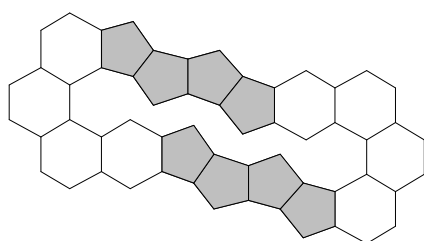

37

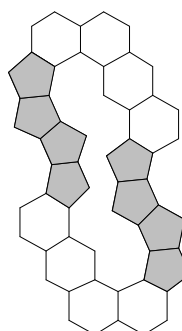

38

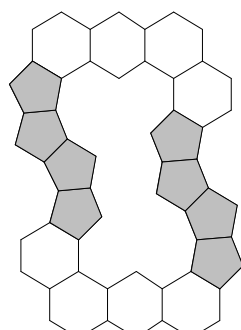

39

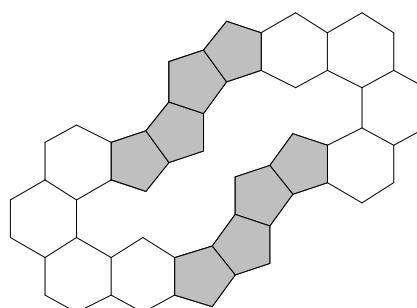

40

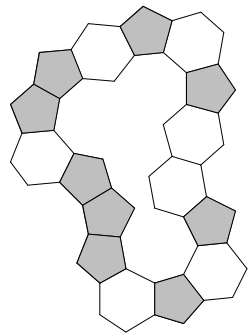

41

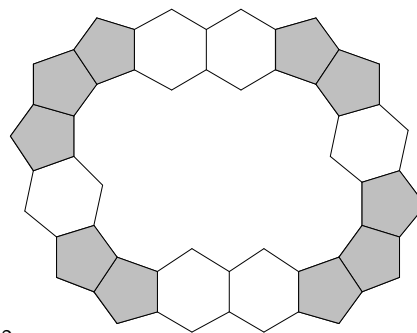

42

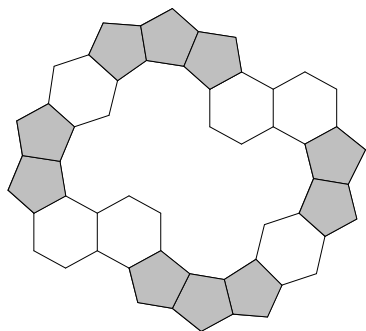

43

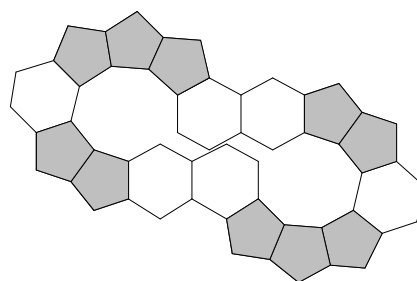

44

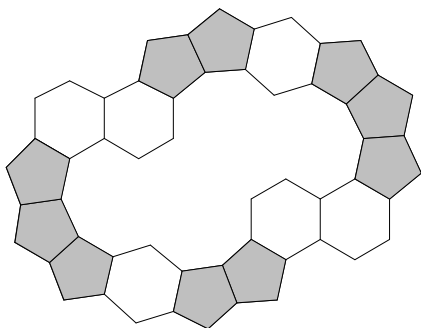

45

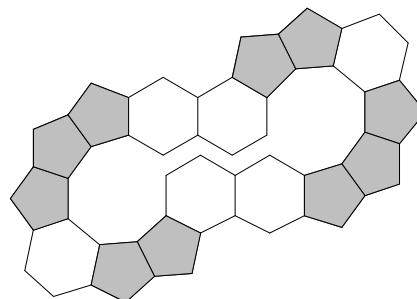

46

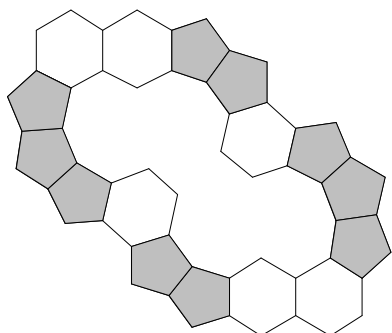

47

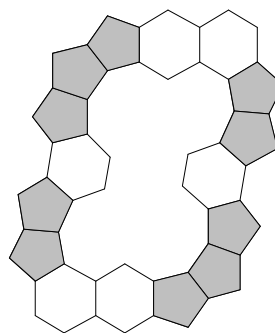

48

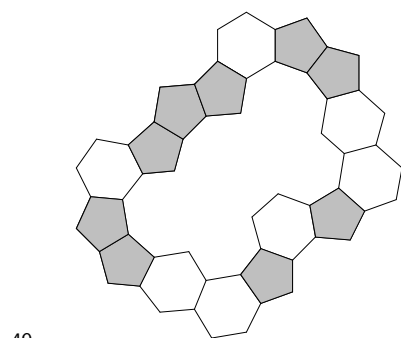

49

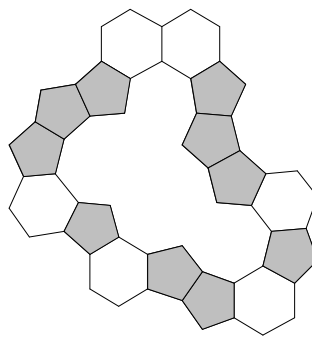

50

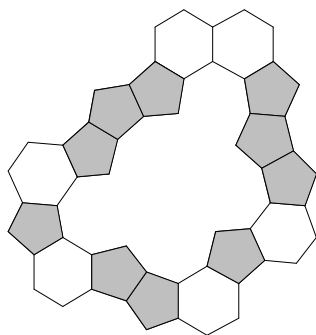

51

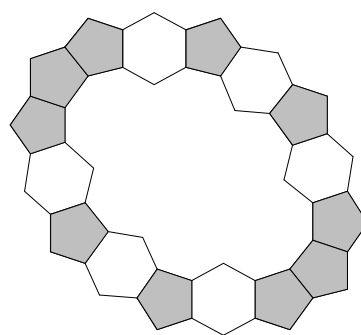

52

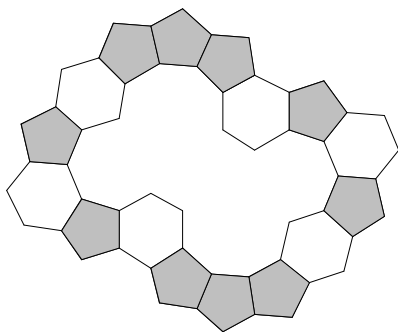

53

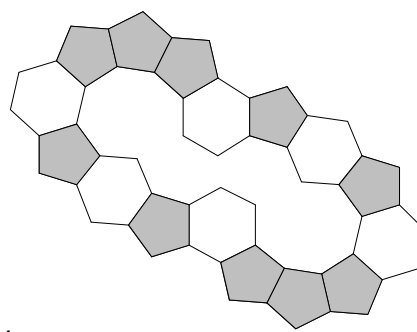

54

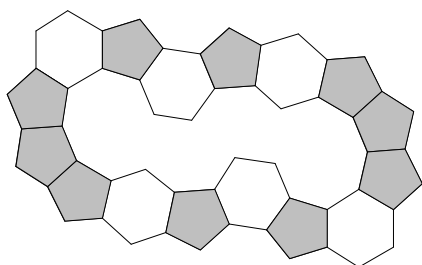

55

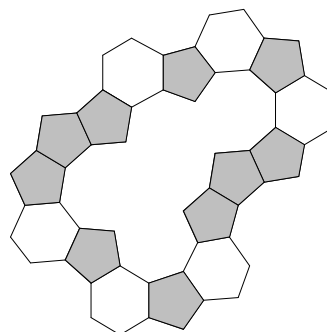

56

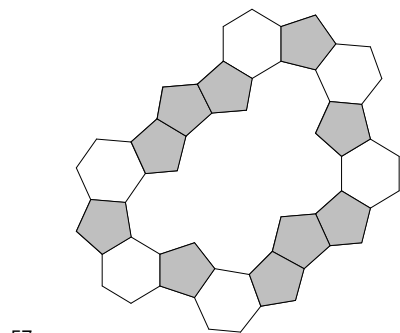

57

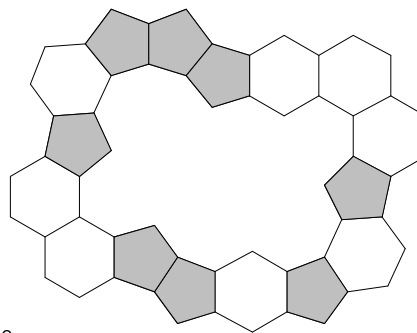

58

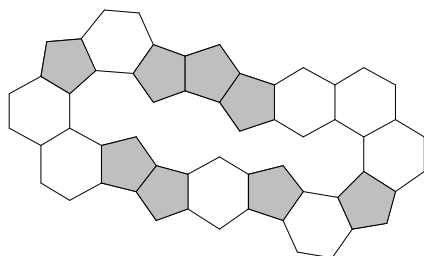

59

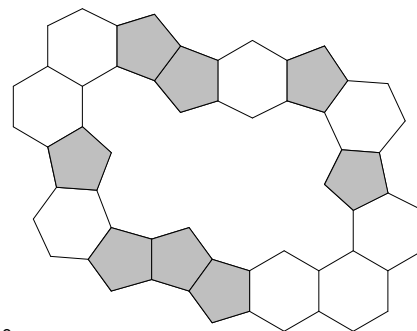

60

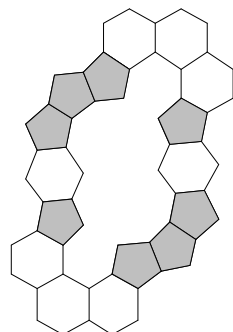

61

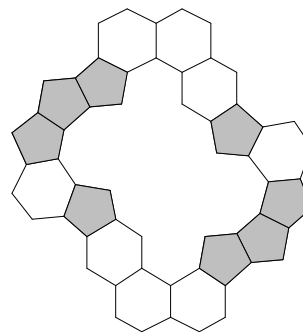

62

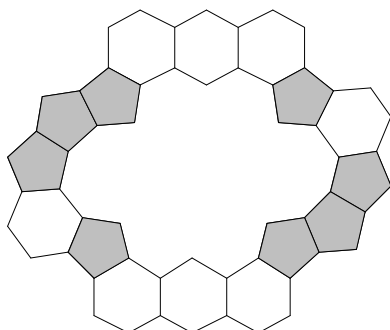

63

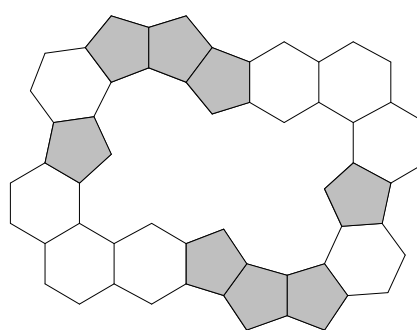

64



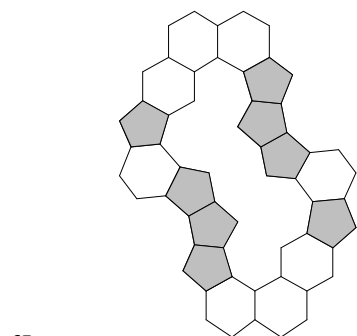

65

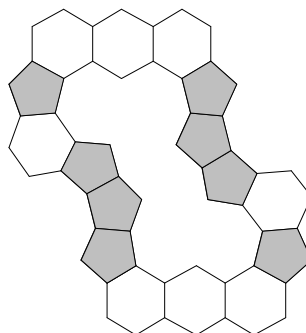

66

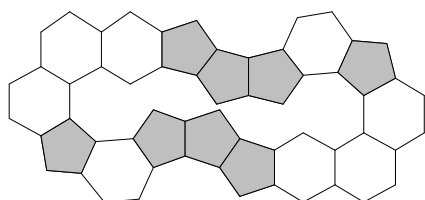

67

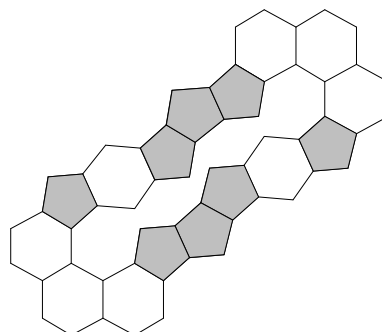

68

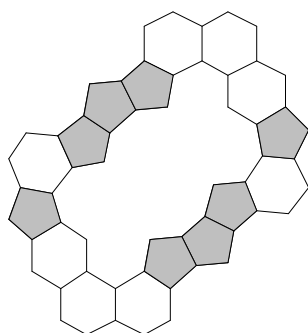

69

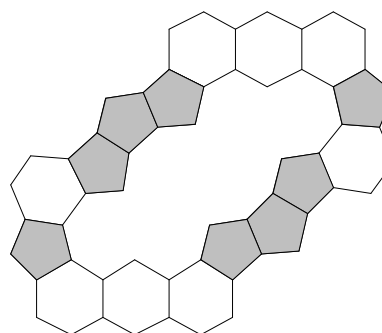

70

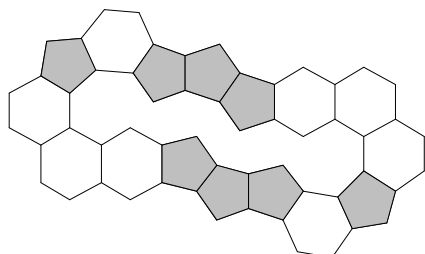

71

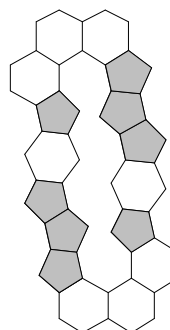

72

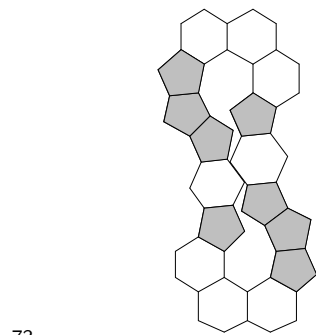

73

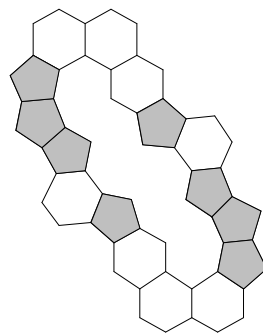

74

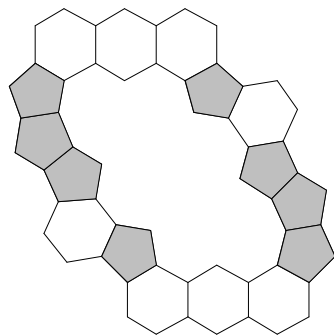

75

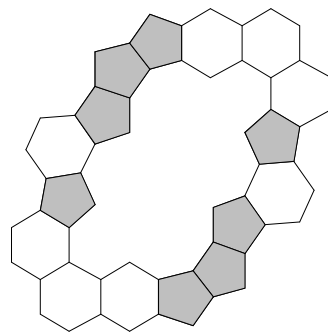

76

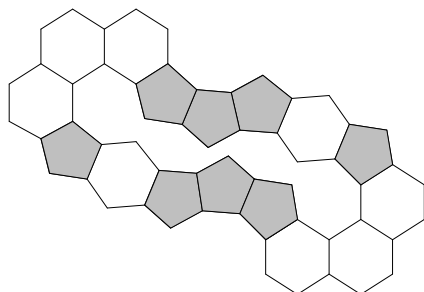

77

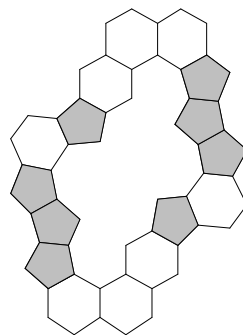

78

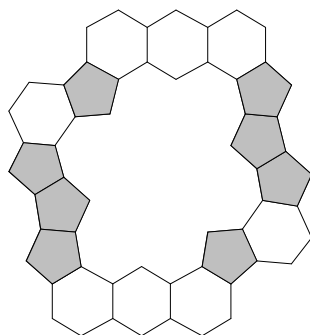

79

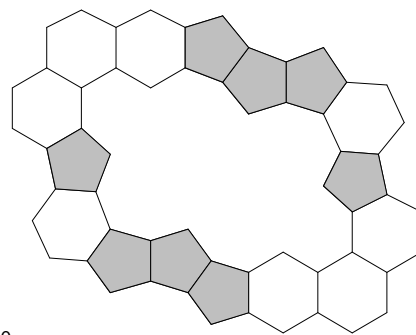

80

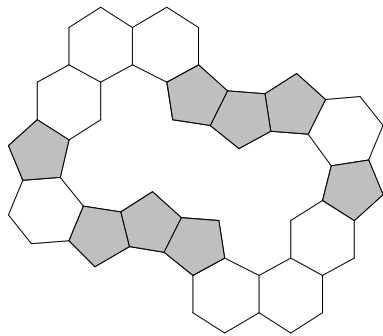

81

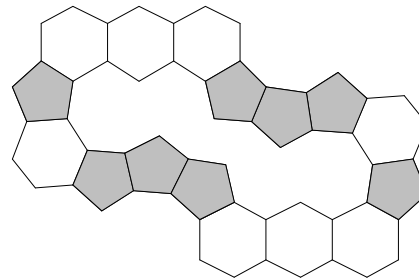

82

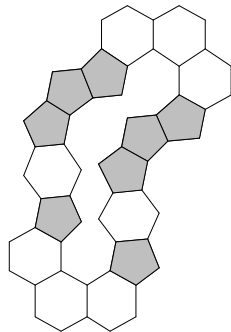

83

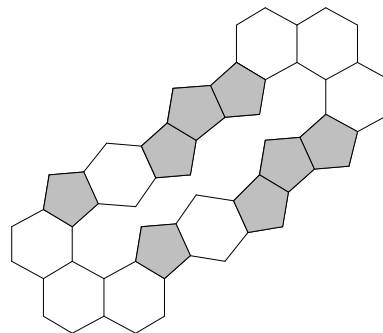

84

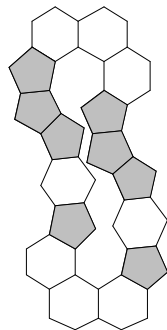

85

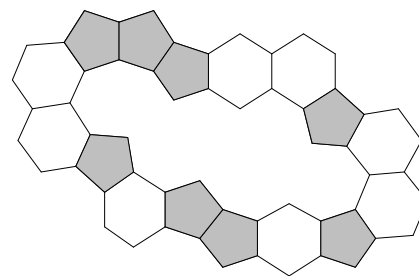

86

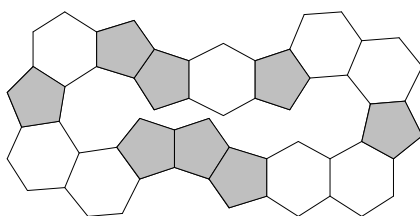

87

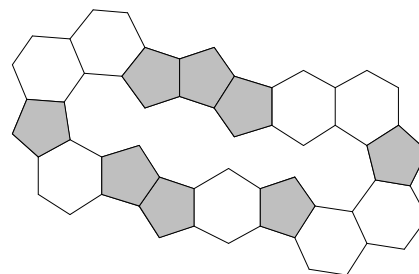

88

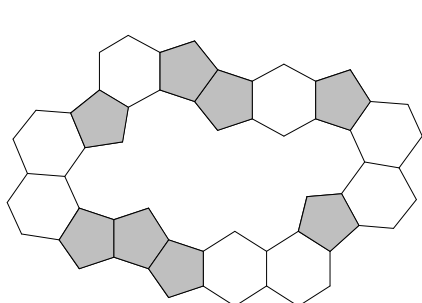

89

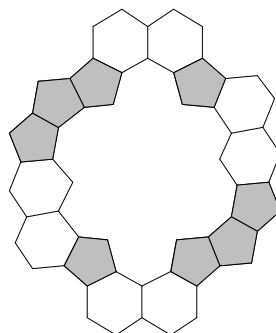

90

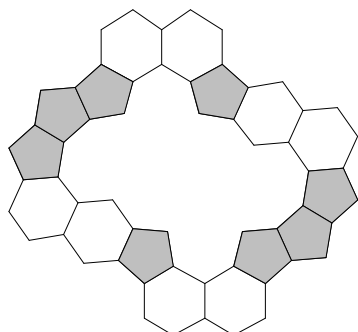

91

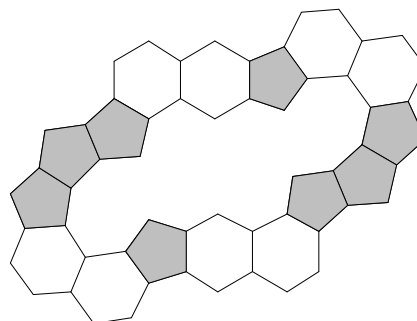

92

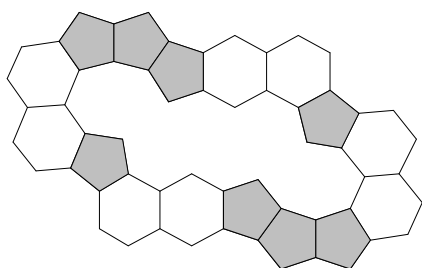

93

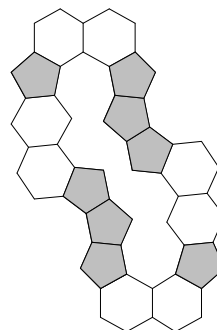

94

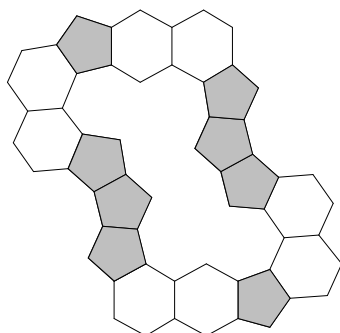

95

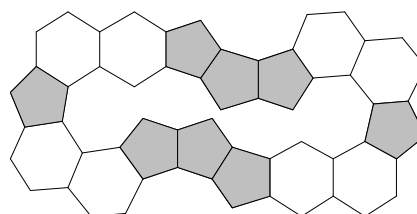

96

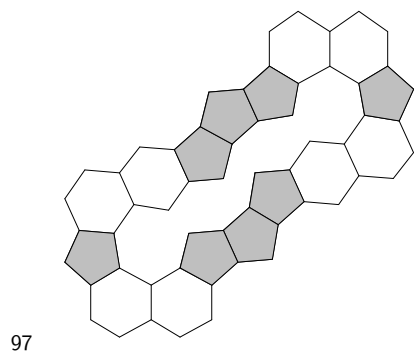

97

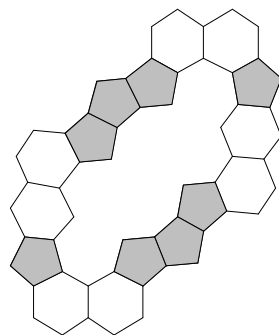

98

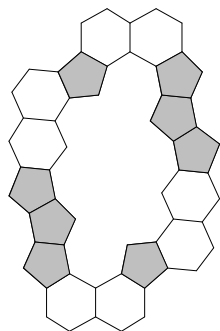

99

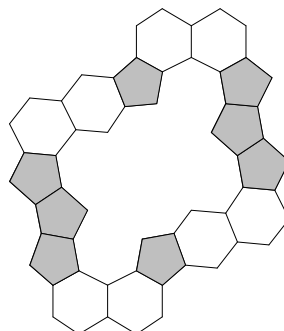

100

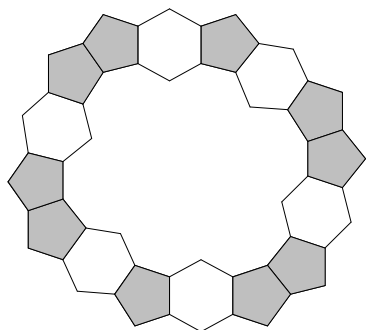

101

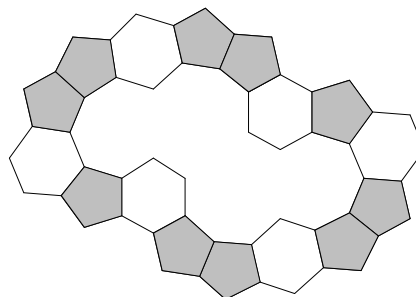

102

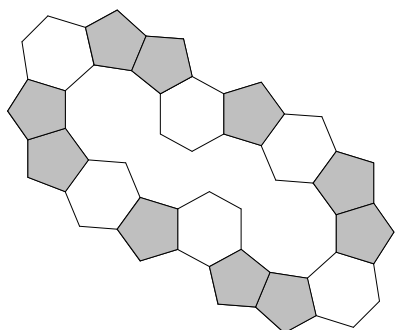

103

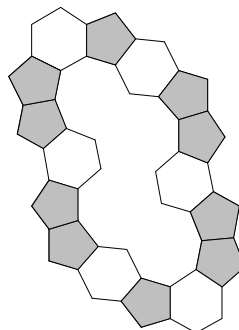

104

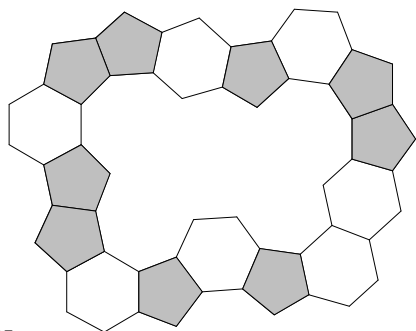

105

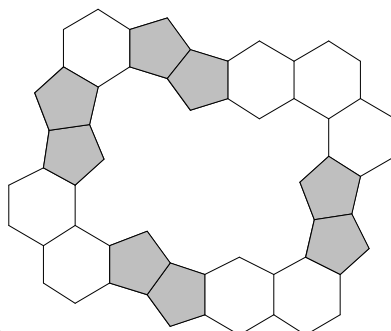

106

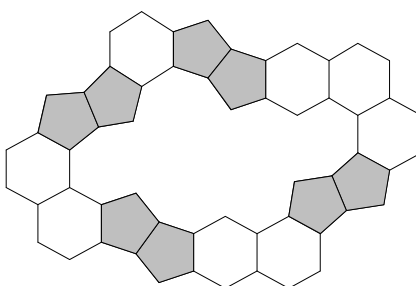

107

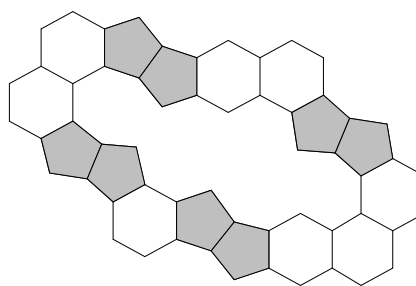

108

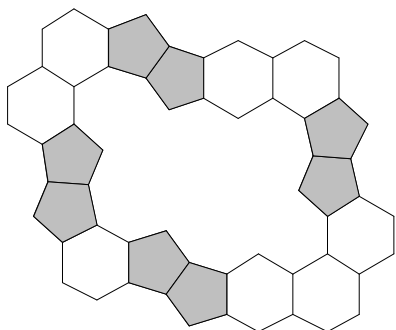

109

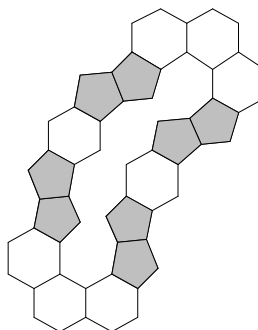

110

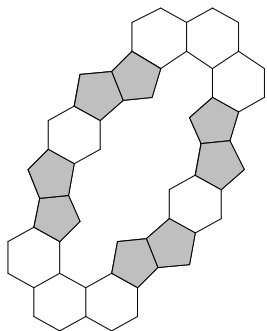

111

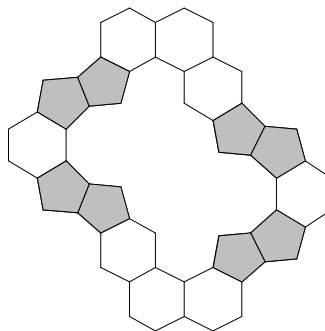

112

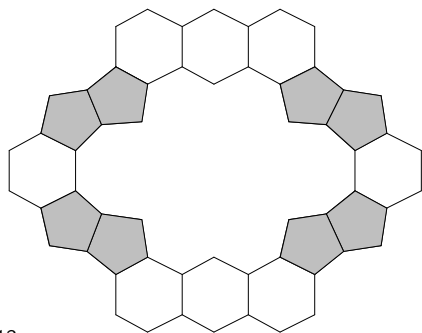

113

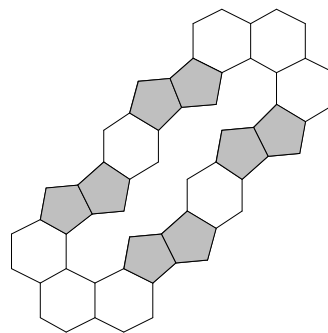

114

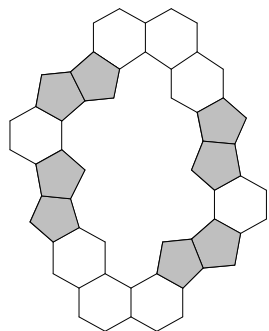

115

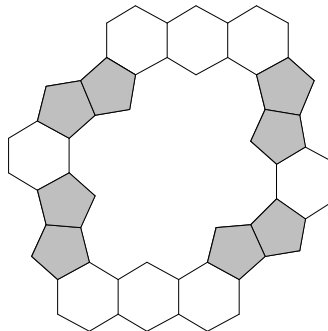

116

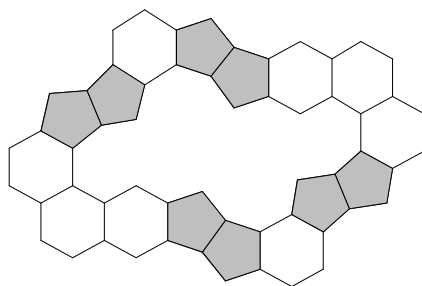

117

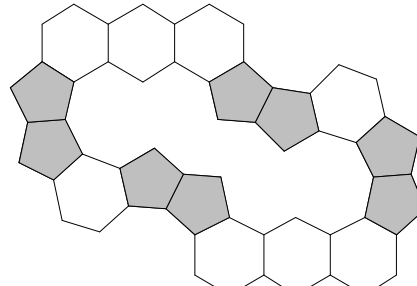

118

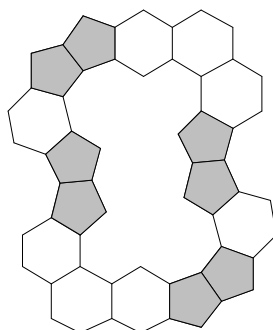

119

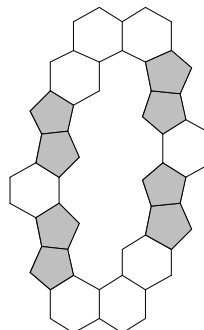

120

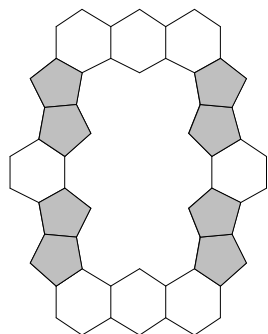

121

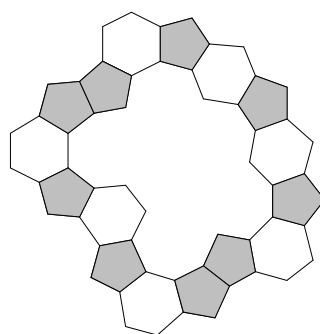

122

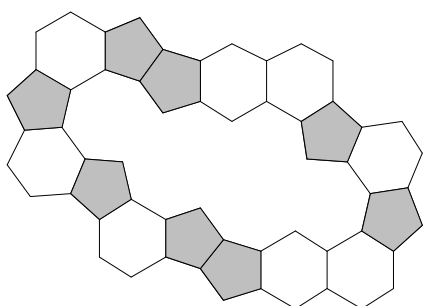

123

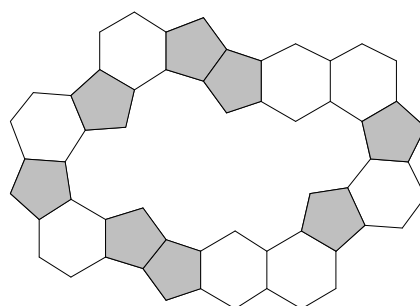

124

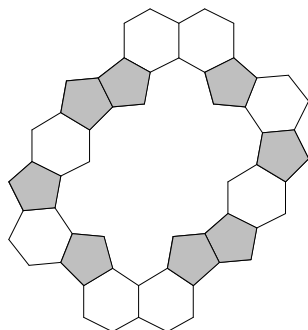

125

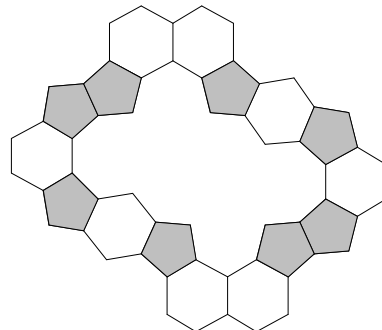

126

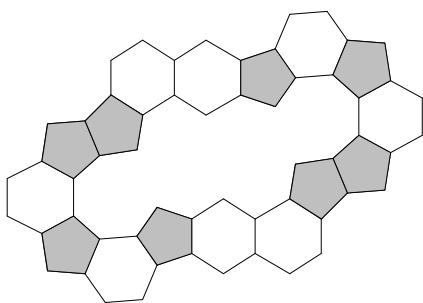

127

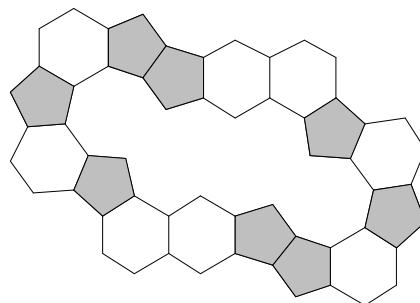

128



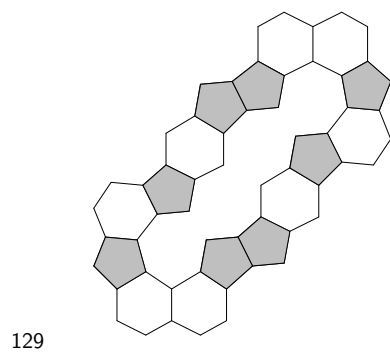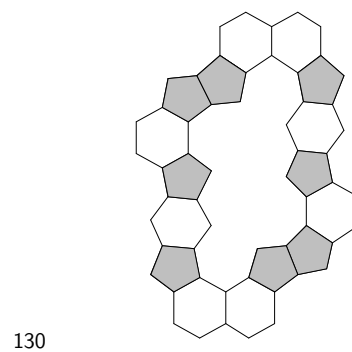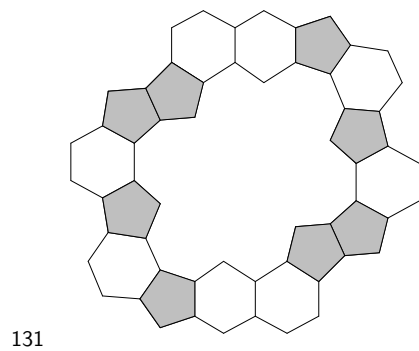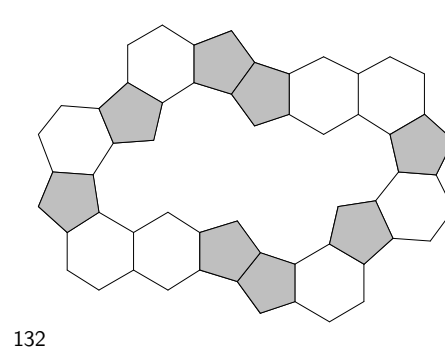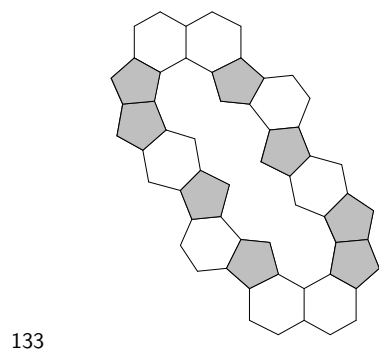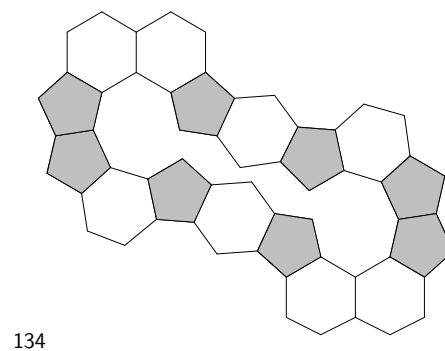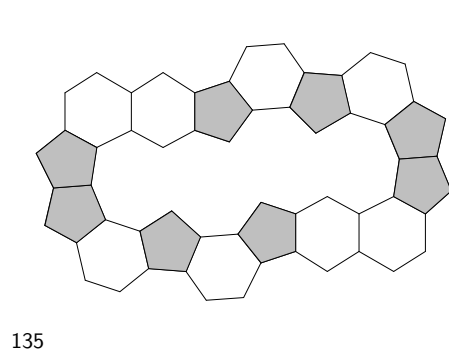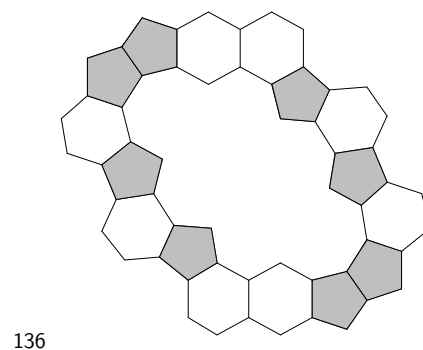

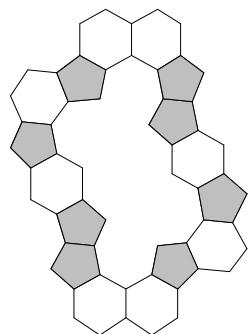

137

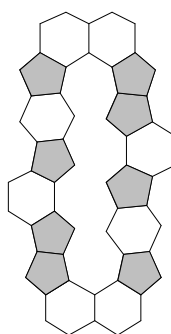

138

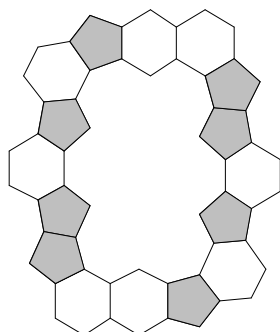

139

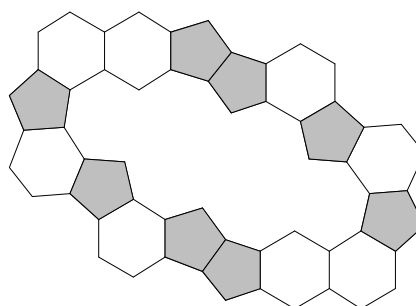

140

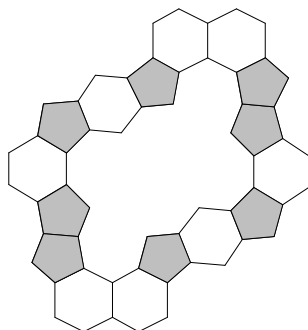

141

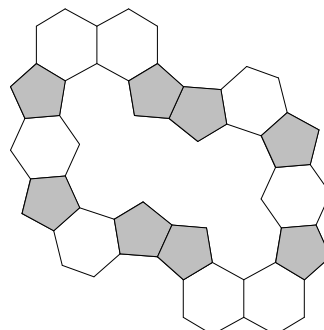

142

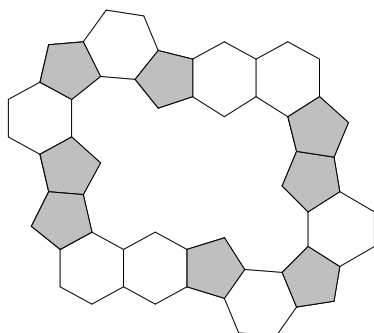

143

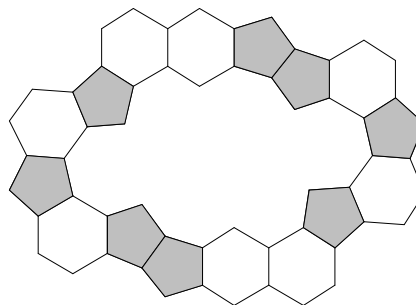

144

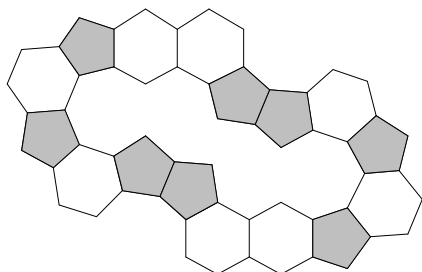

145

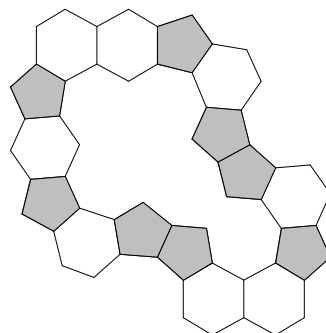

146

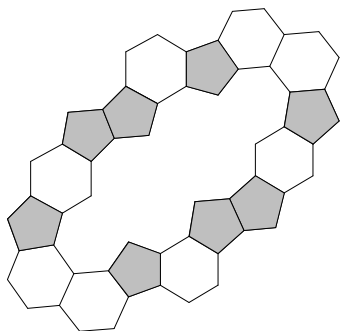

147

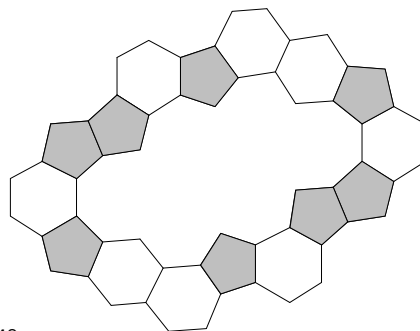

148

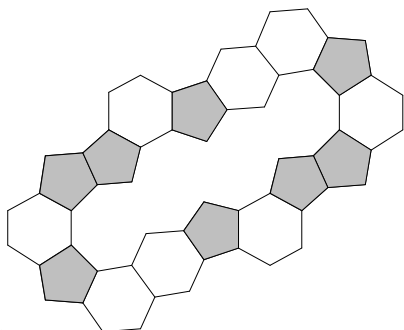

149

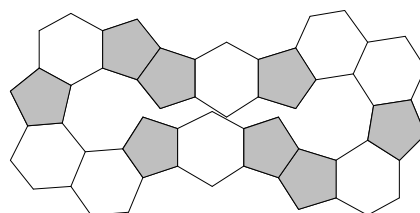

150

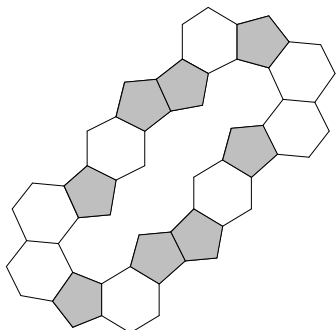

151

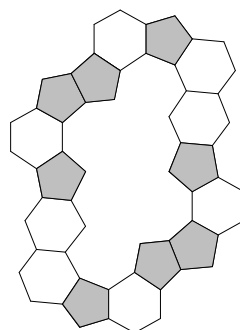

152

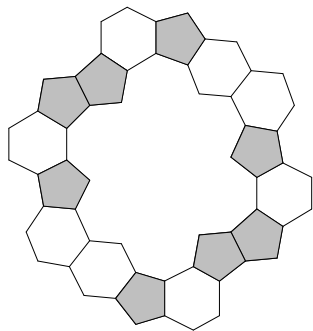

153

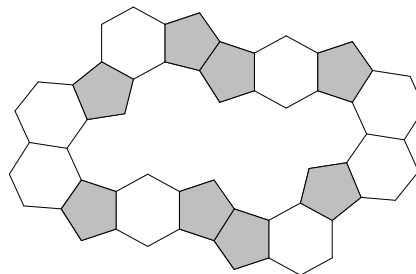

154

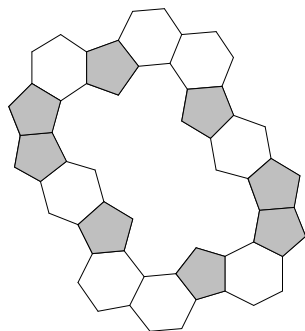

155

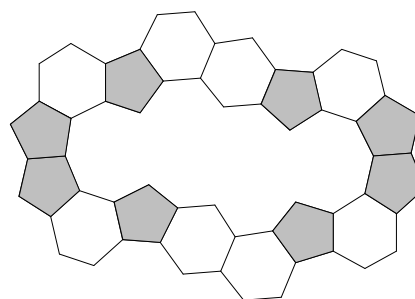

156

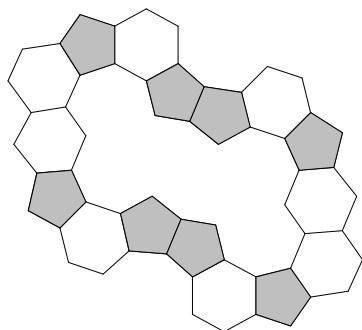

157

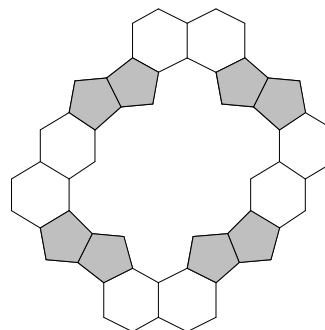

158

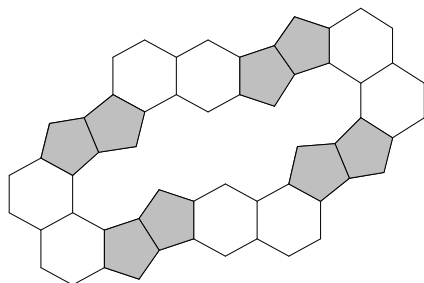

159

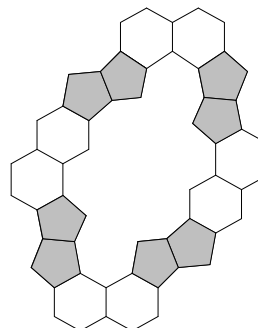

160

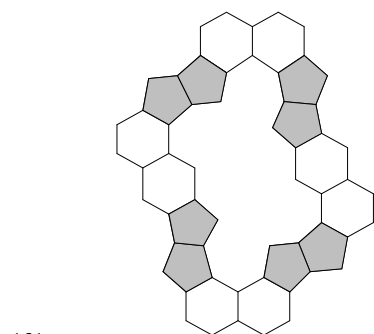

161

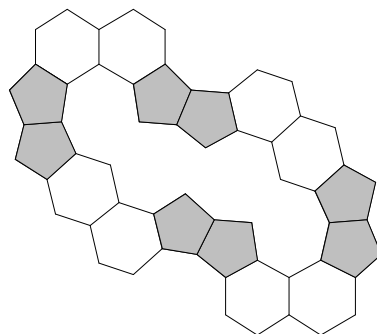

162

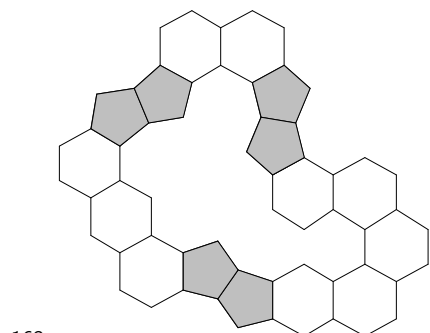

163

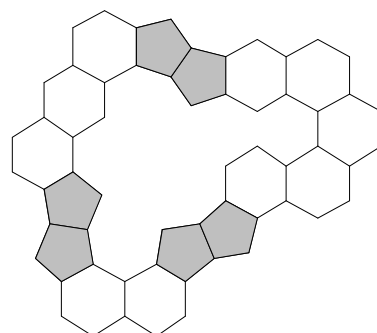

164

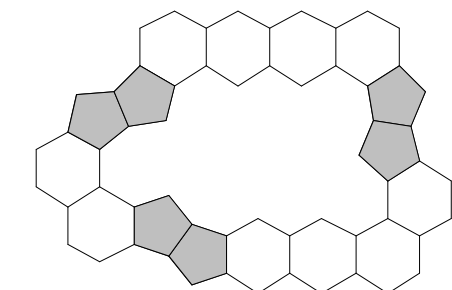

165

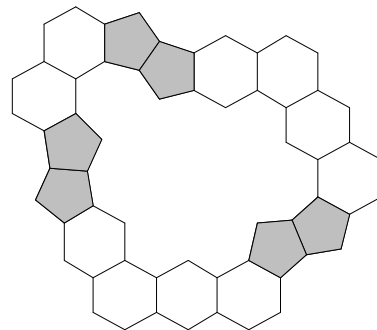

166

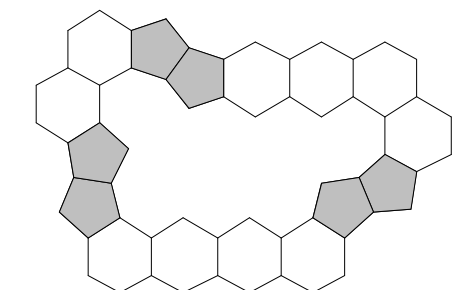

167

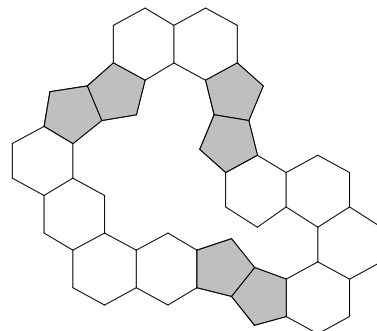

168

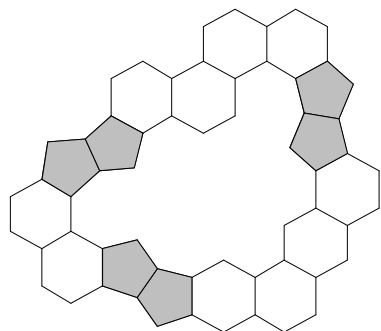

169

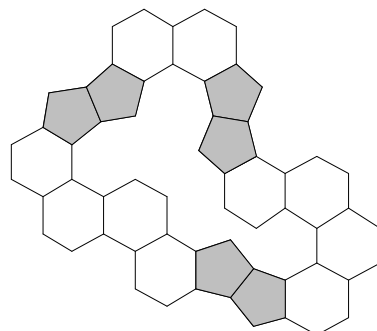

170

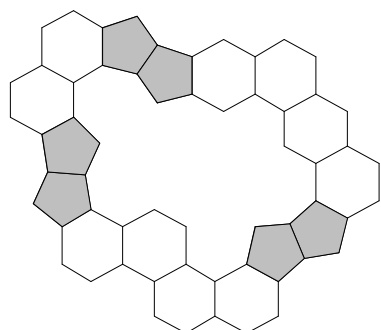

171

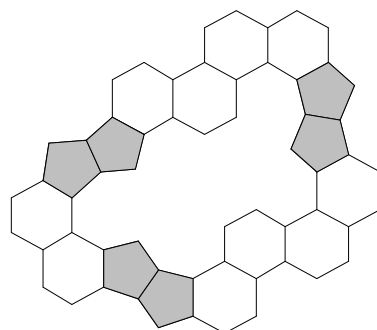

172

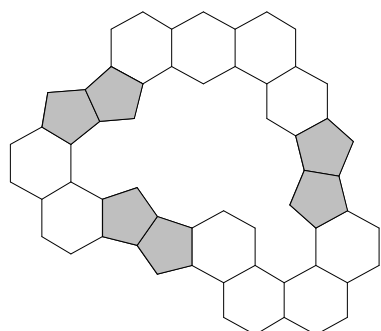

173

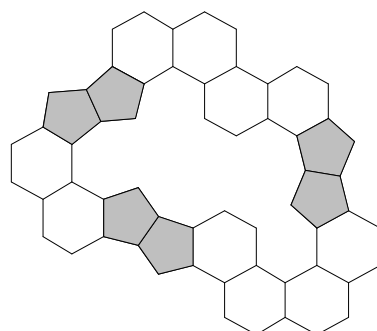

174

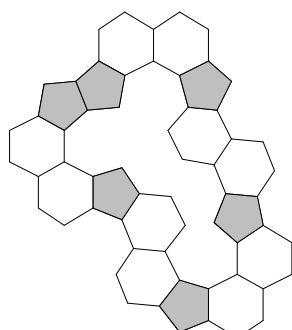

175

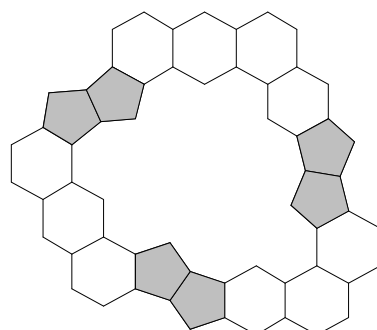

176

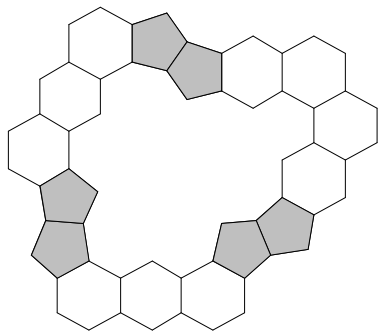

177

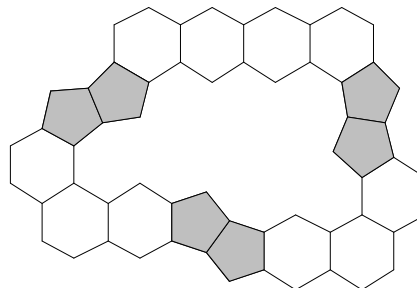

178

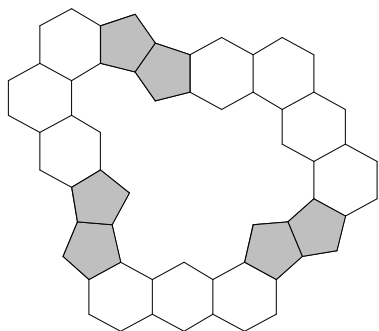

179

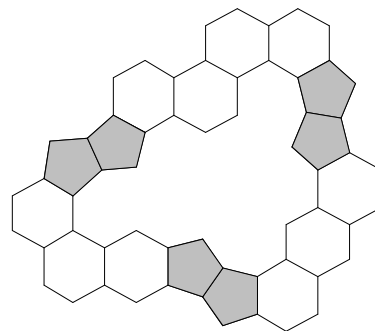

180

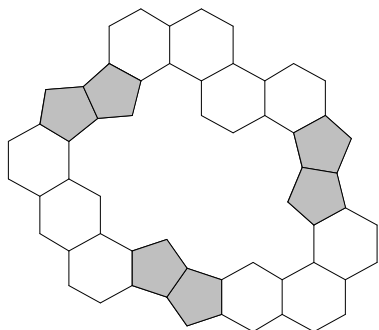

181

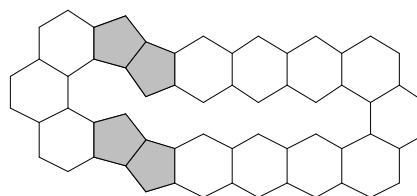

182

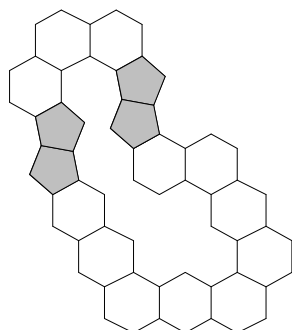

183

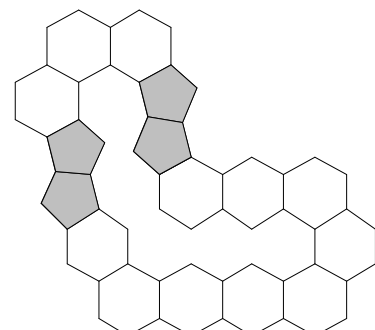

184

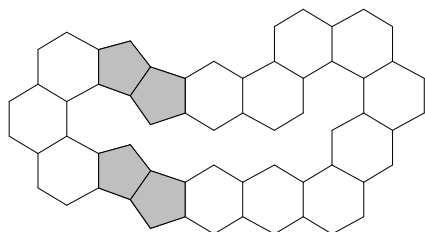

185

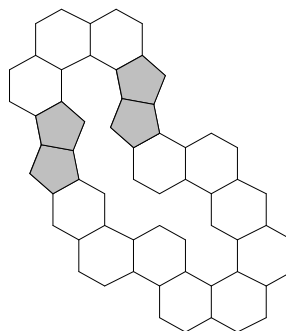

186

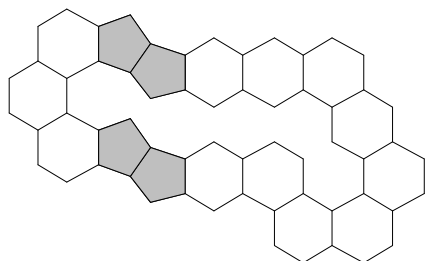

187

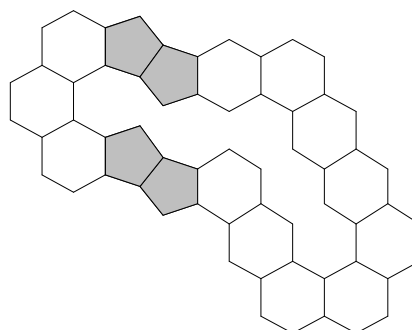

188

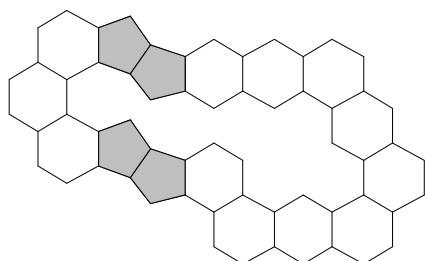

189

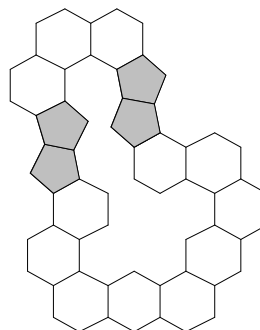

190

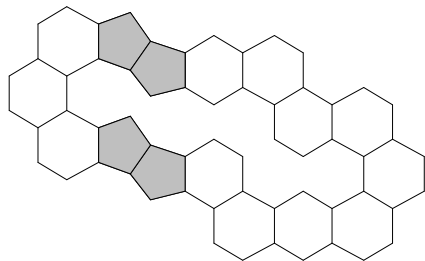

191

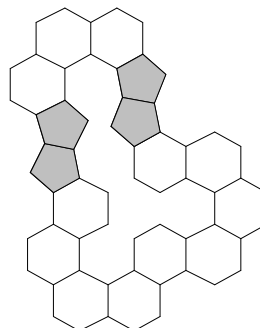

192



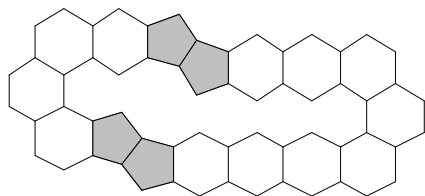

193

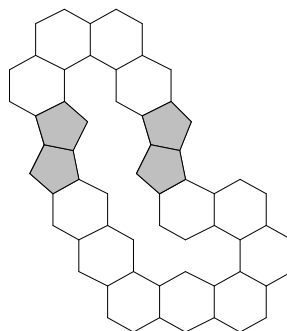

194

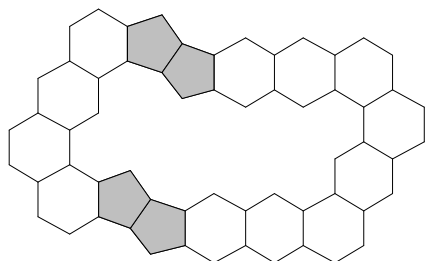

195

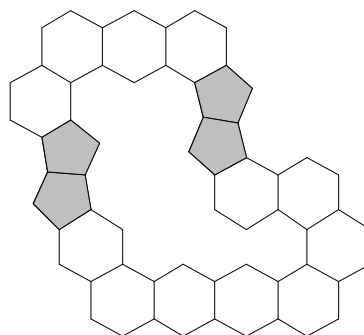

196

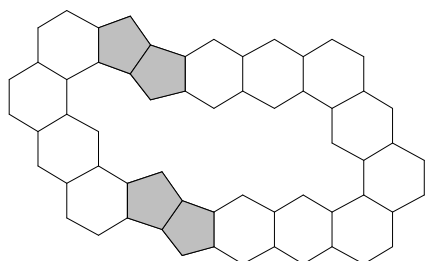

197

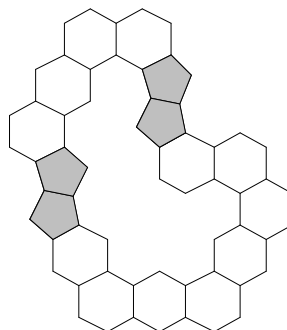

198

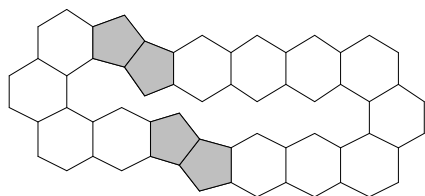

199

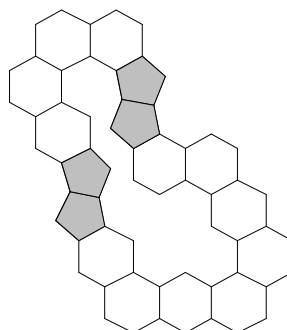

200

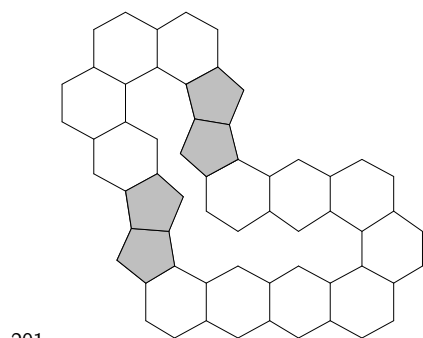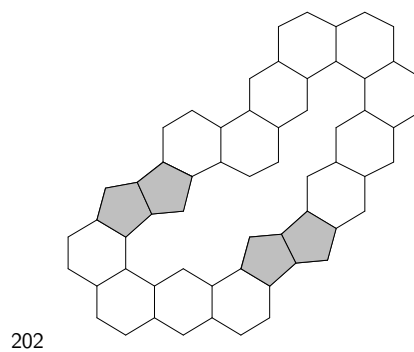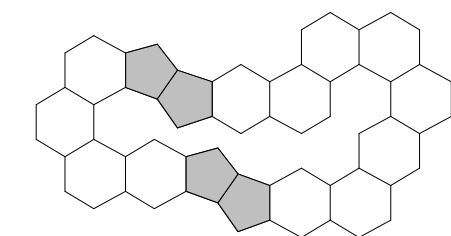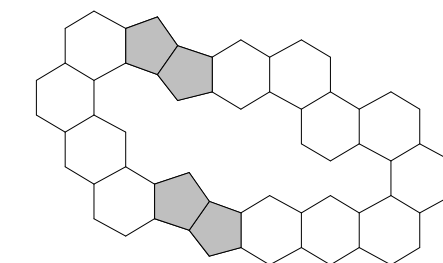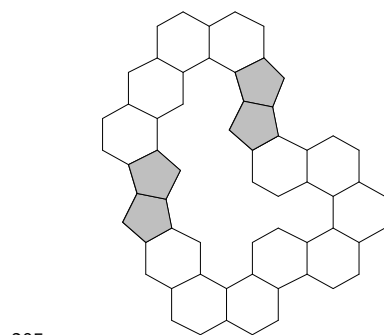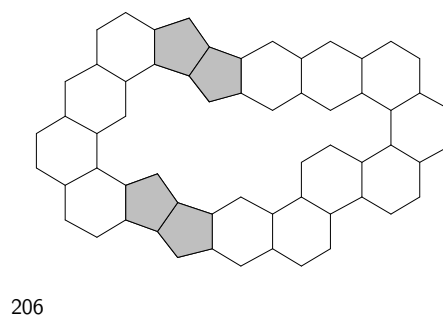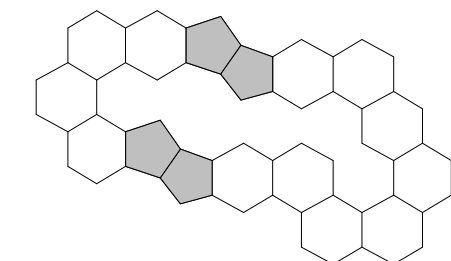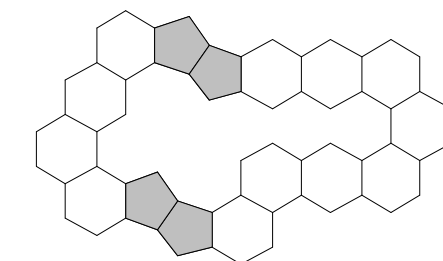

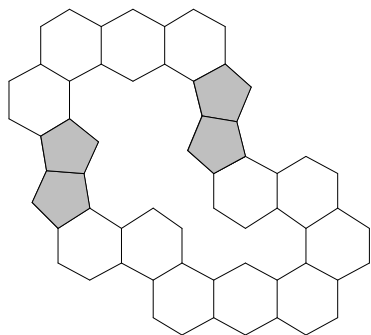

209

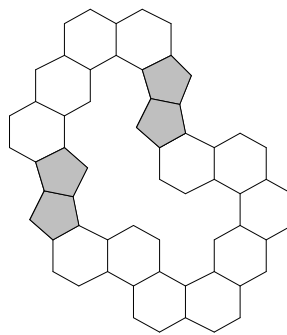

210

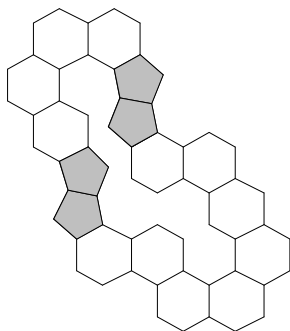

211

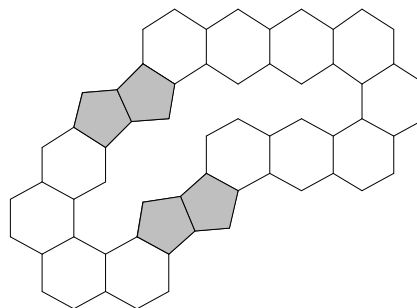

212

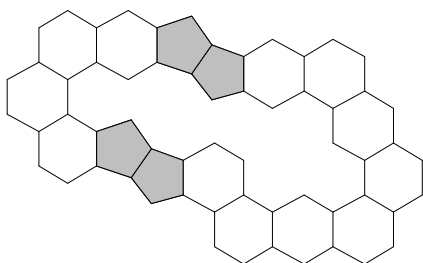

213

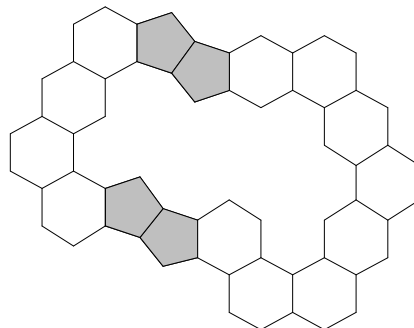

214

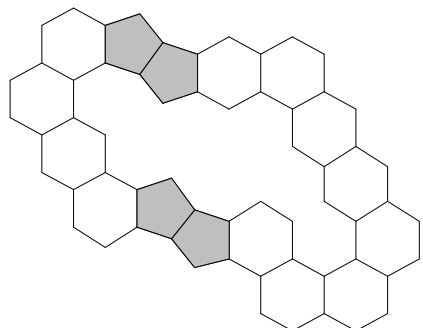

215

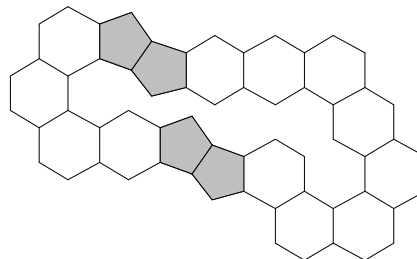

216

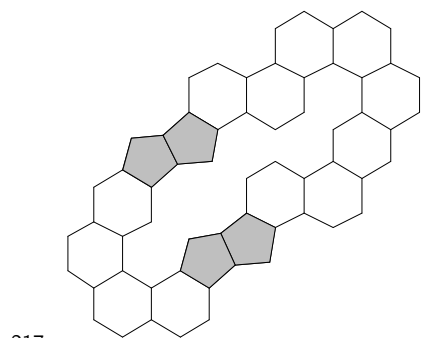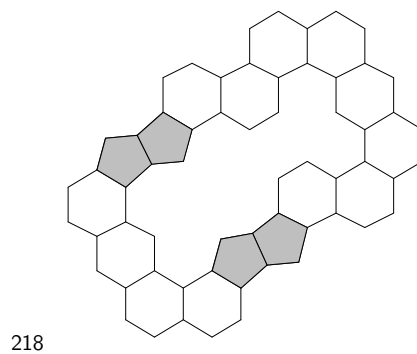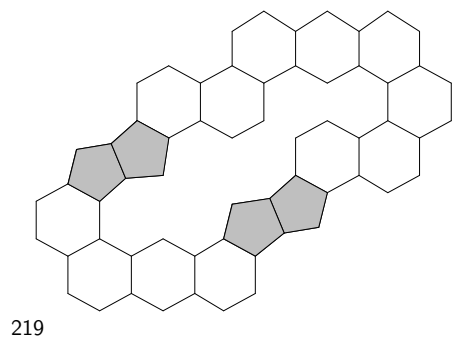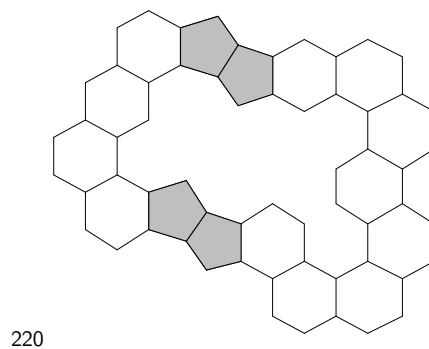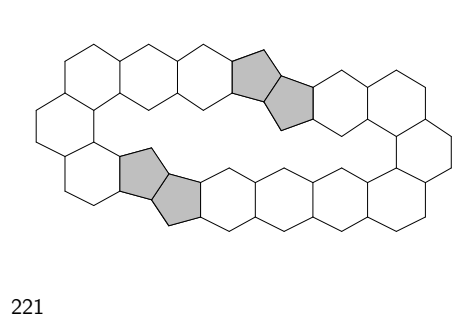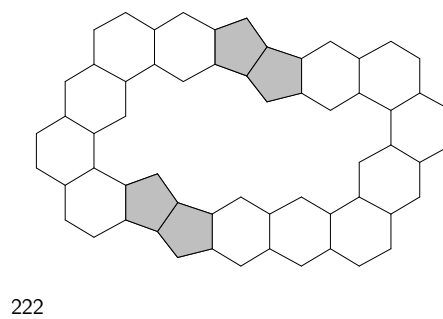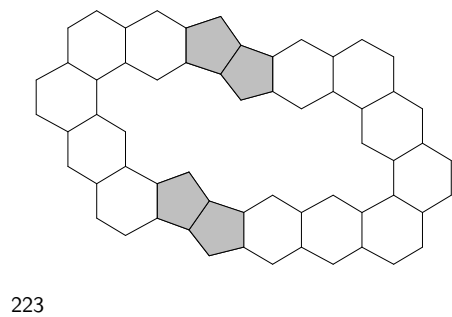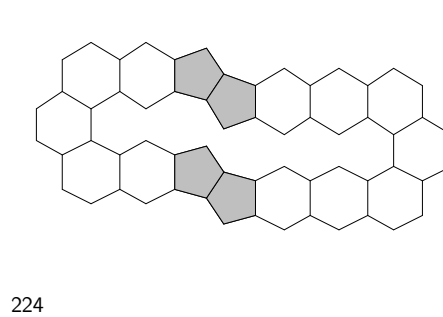

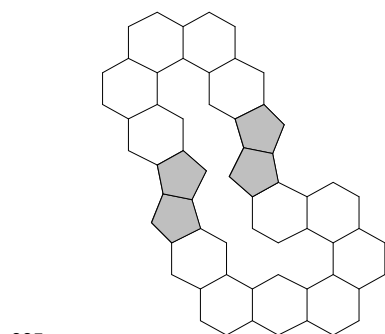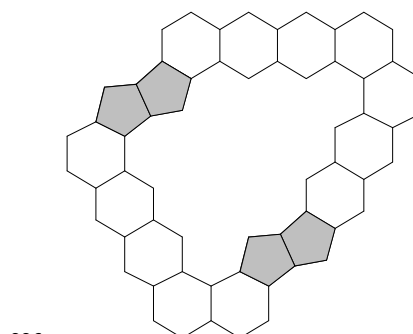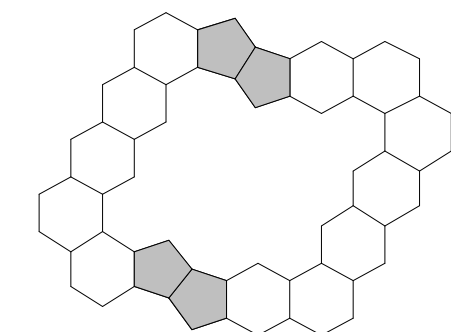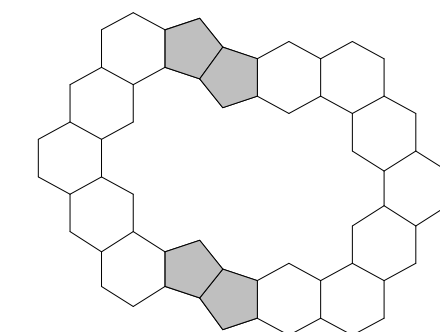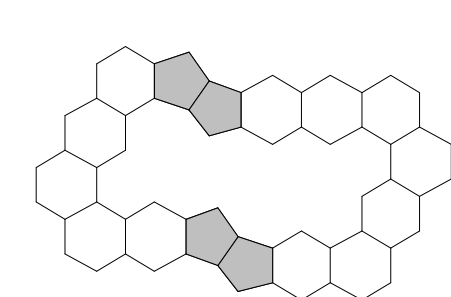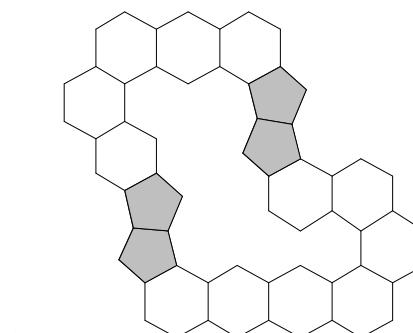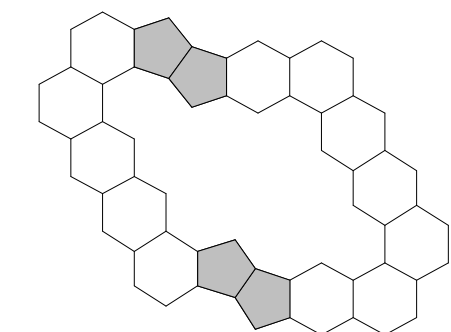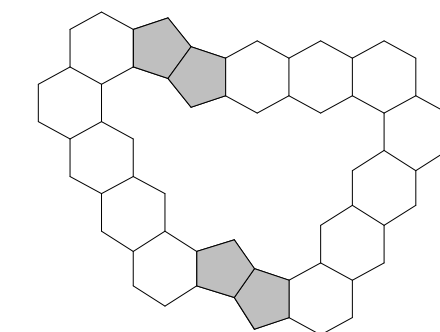

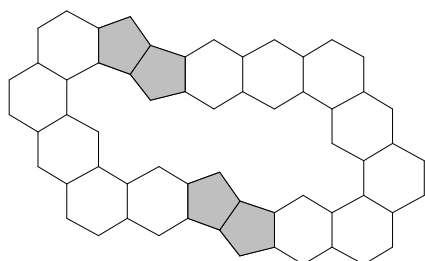

233

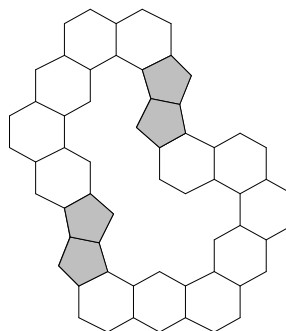

234

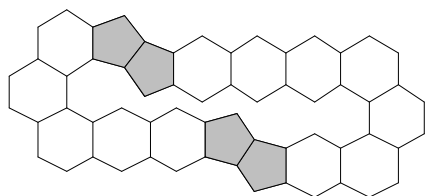

235

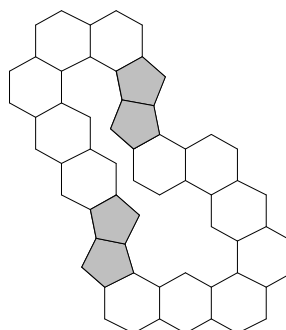

236

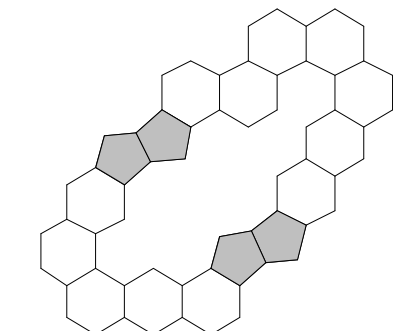

237

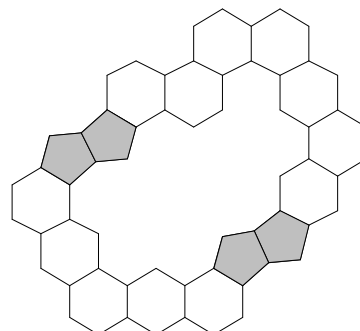

238

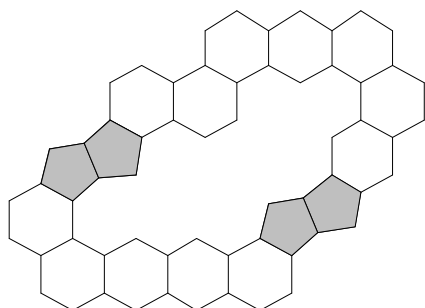

239

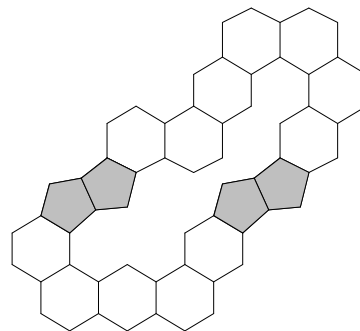

240

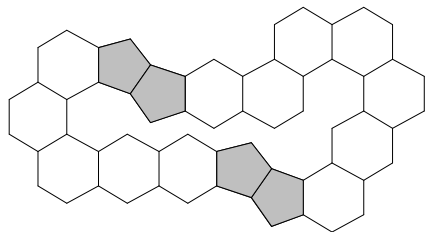

241

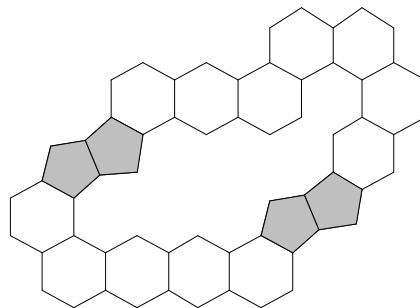

242

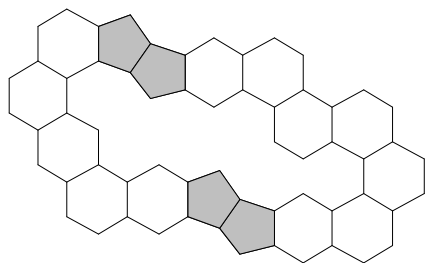

243

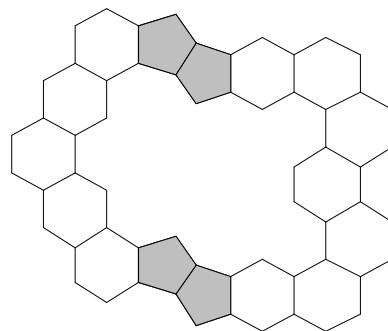

244

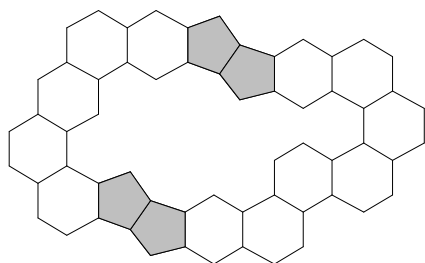

245

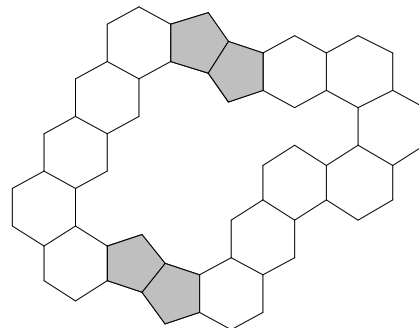

246

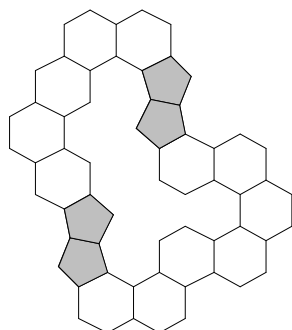

247

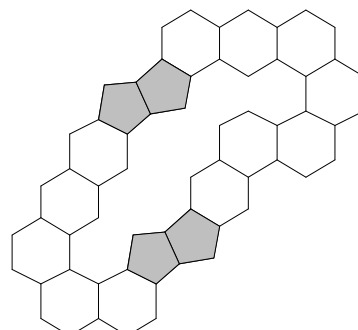

248

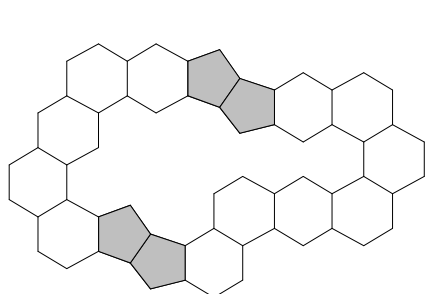

249

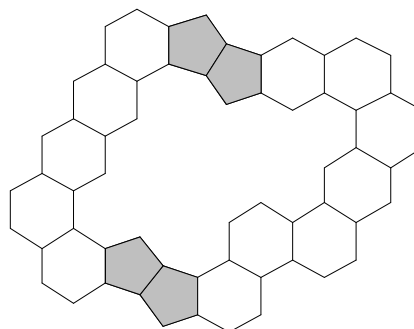

250

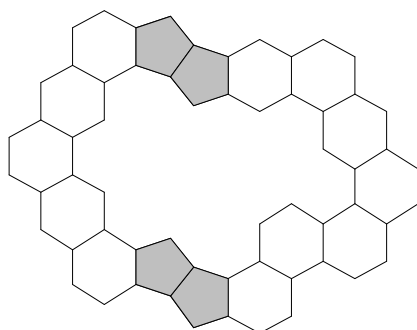

251

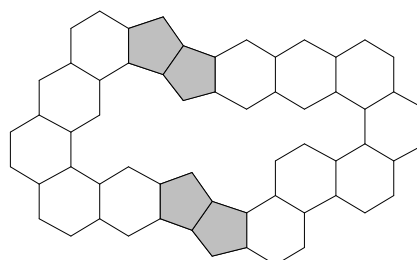

252

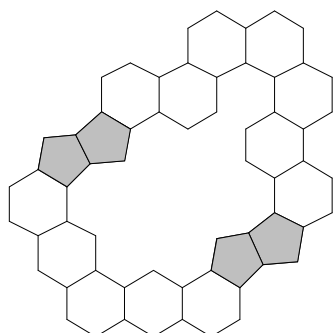

253

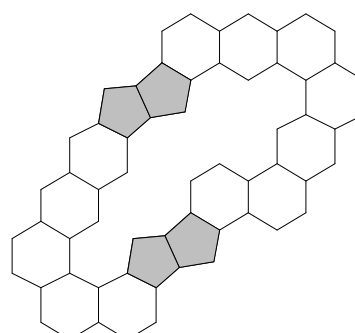

254

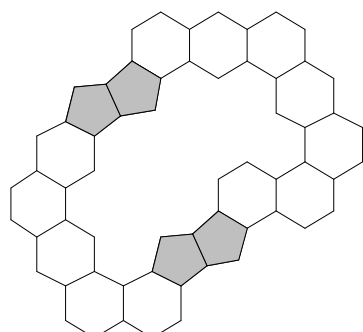

255

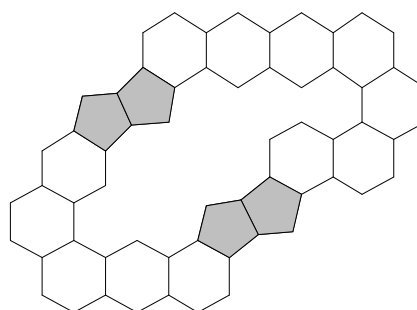

256



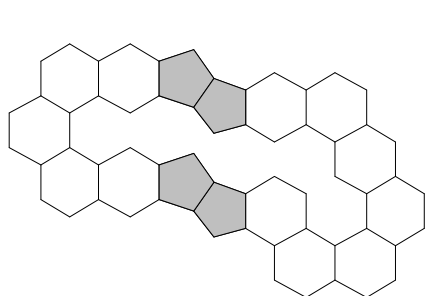

257

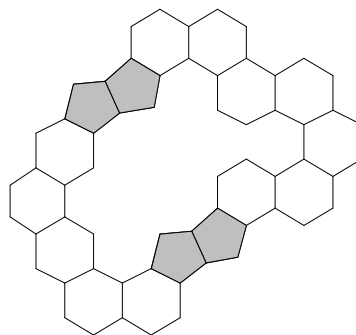

258

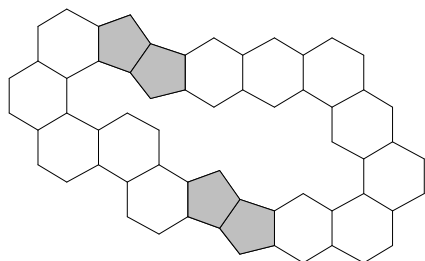

259

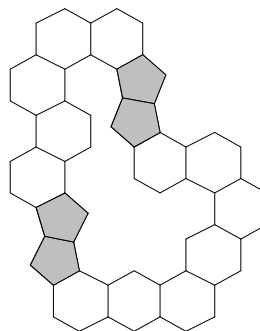

260

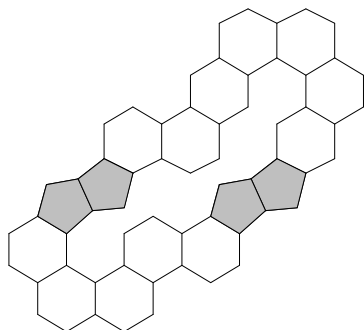

261

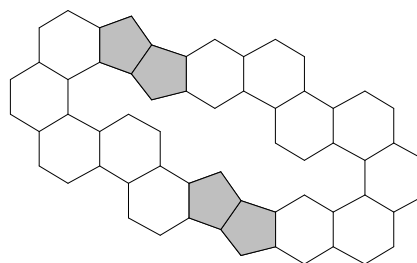

262

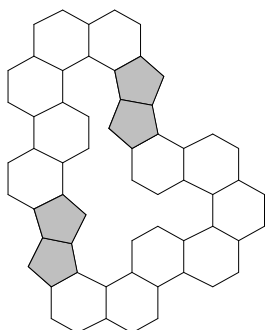

263

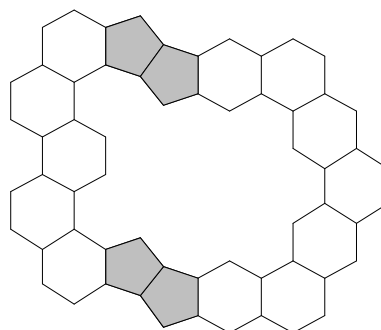

264

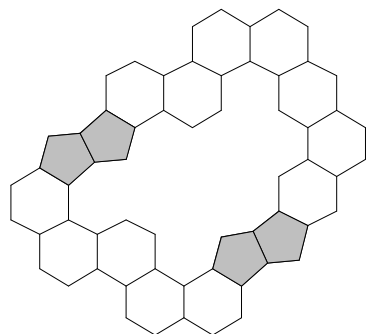

265

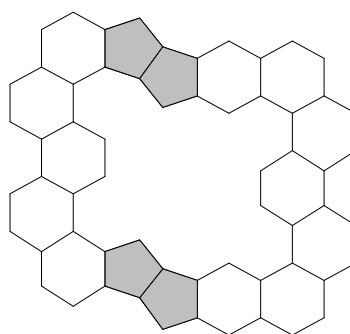

266

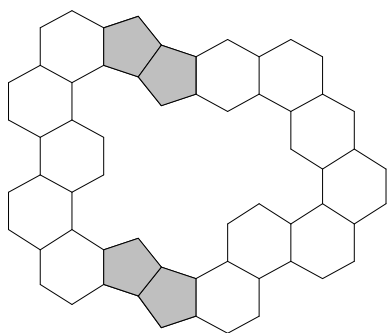

267

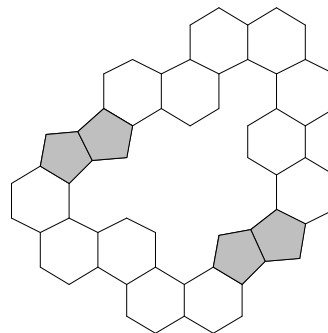

268

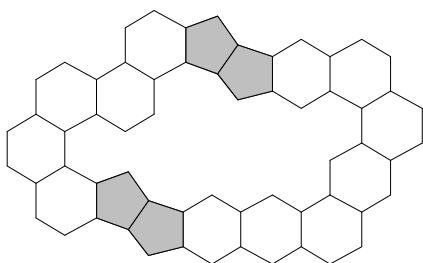

269

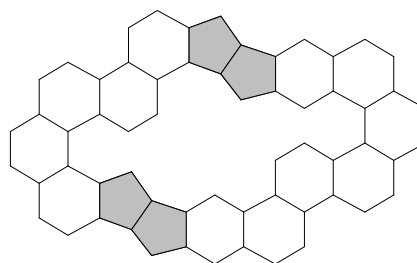

270

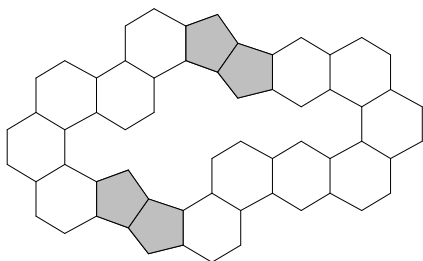

271

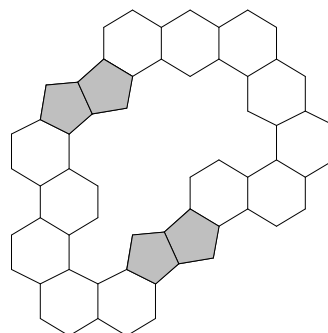

272

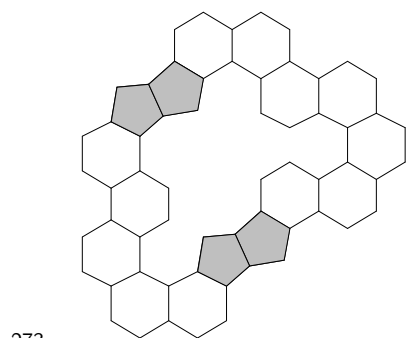

273

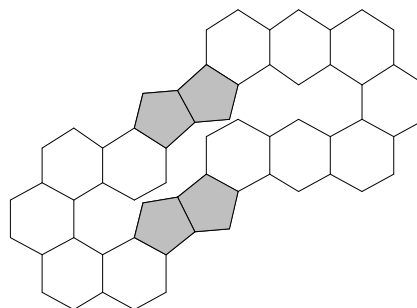

274

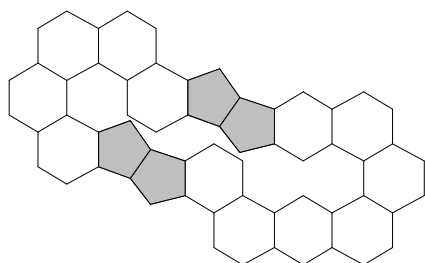

275

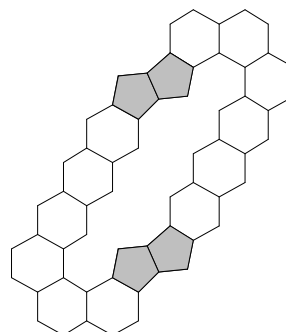

276

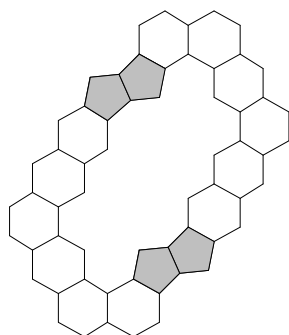

277

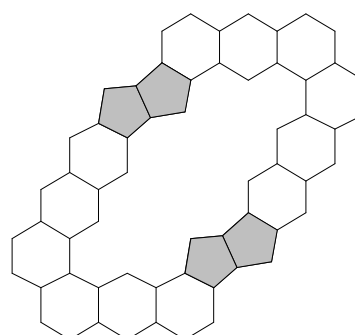

278

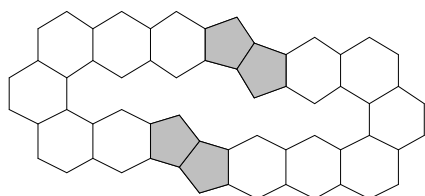

279

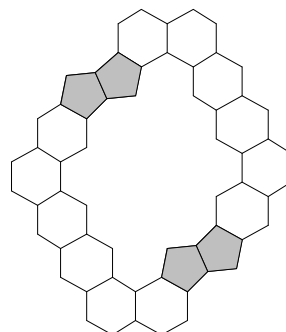

280

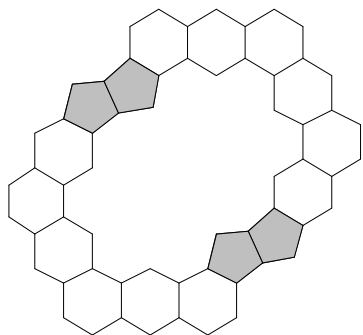

281

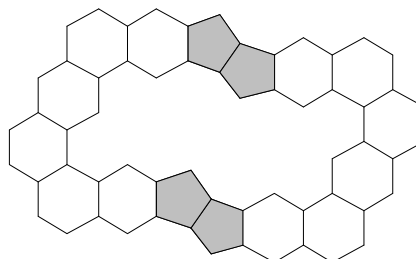

282

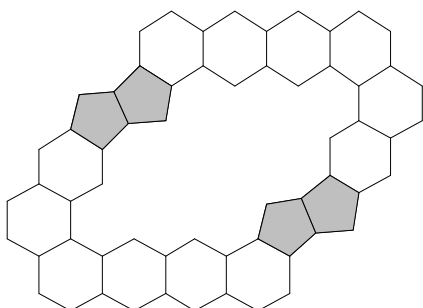

283

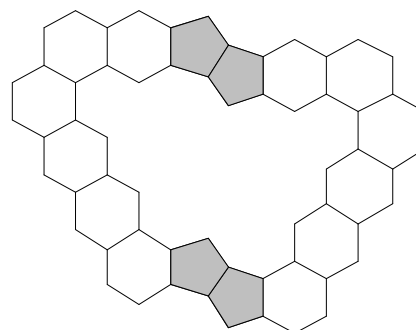

284

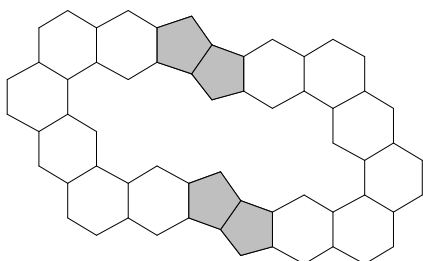

285

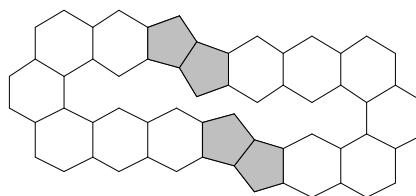

286

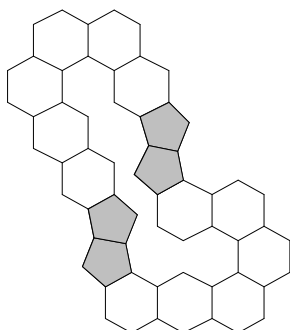

287

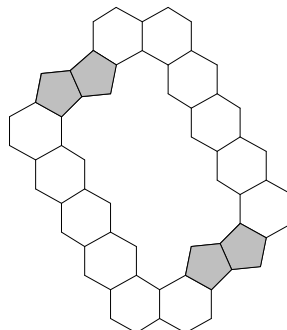

288

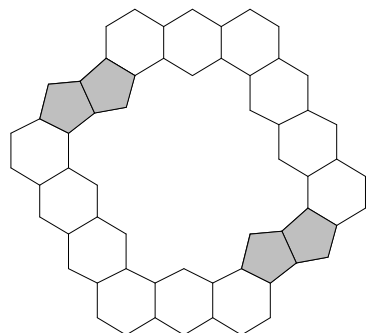

289

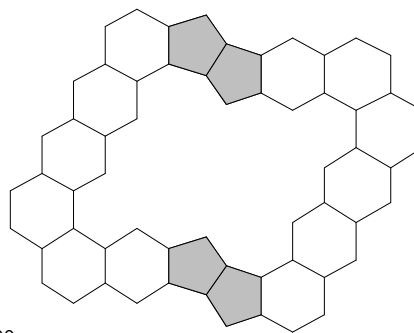

290

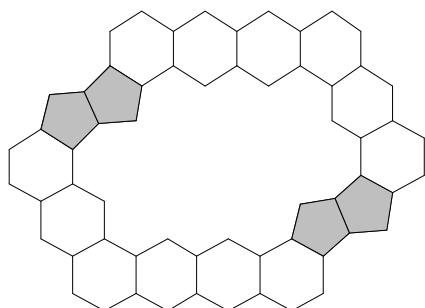

291

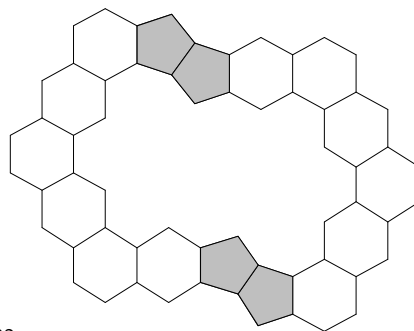

292

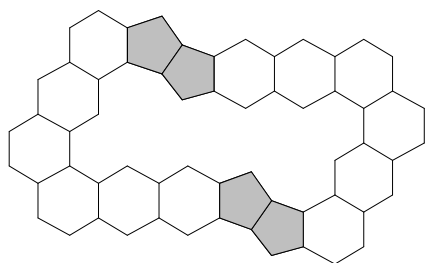

293

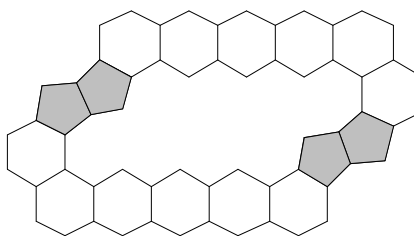

294

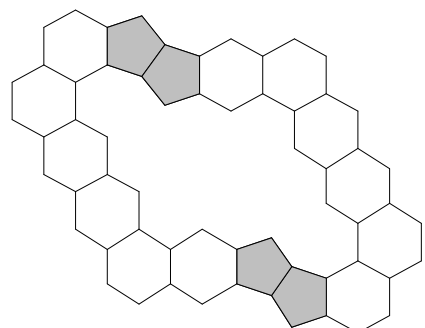

295

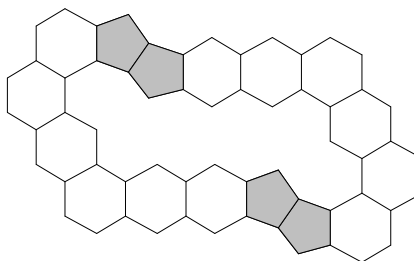

296

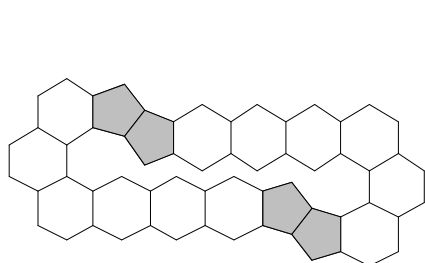

297

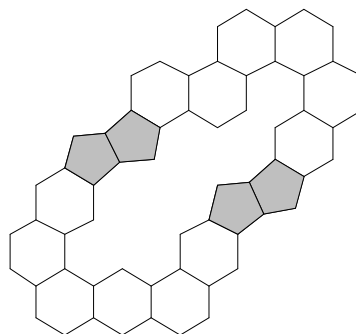

298

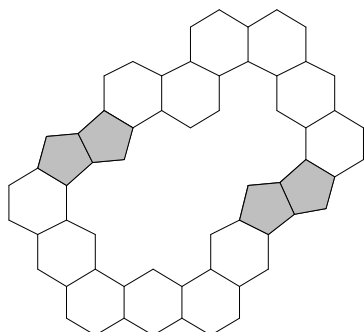

299

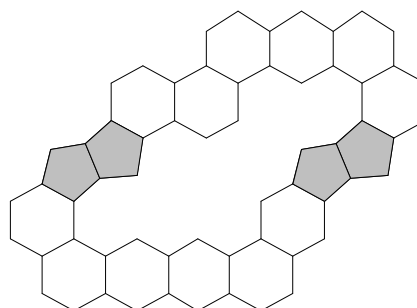

300

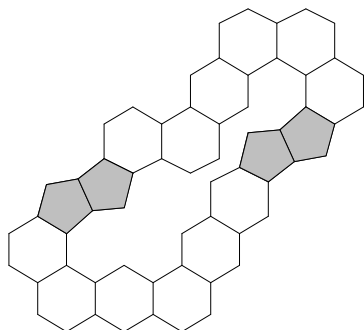

301

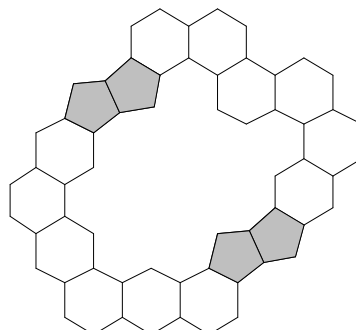

302

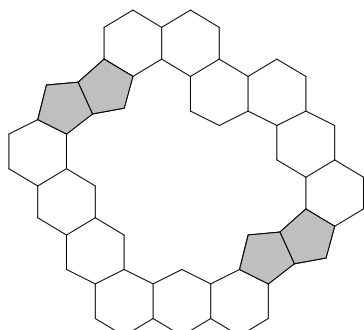

303

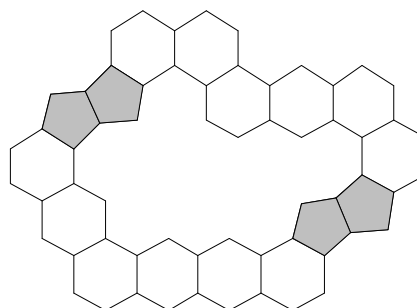

304

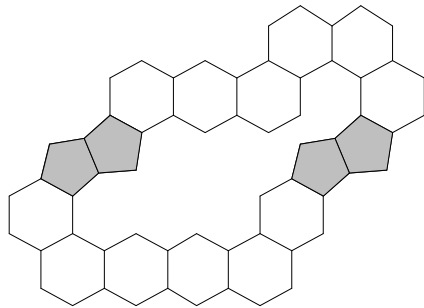

305

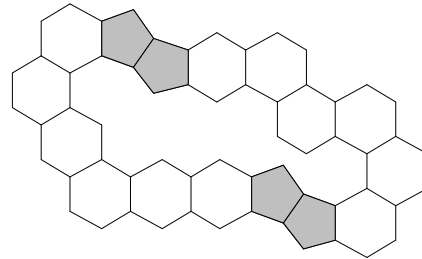

306

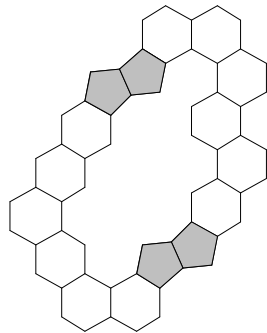

307

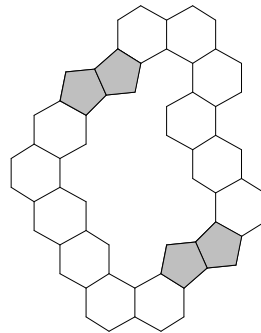

308

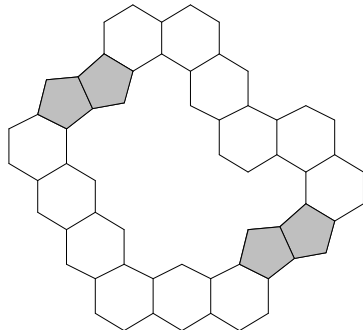

309

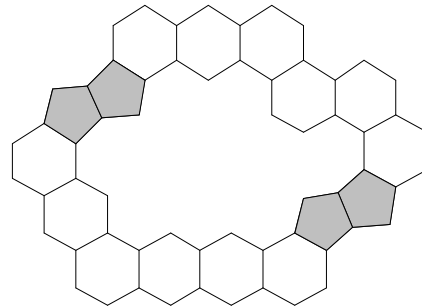

310

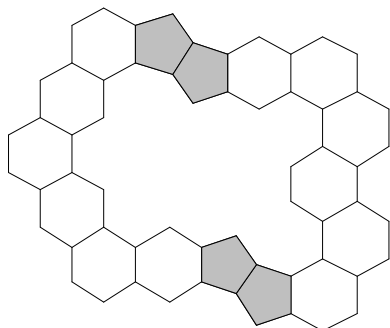

311

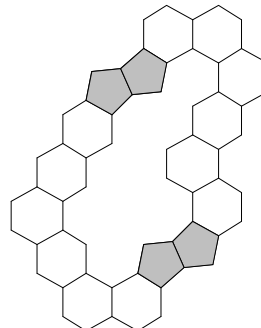

312

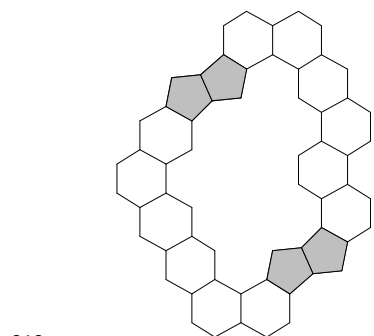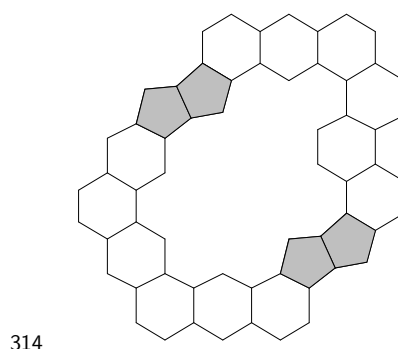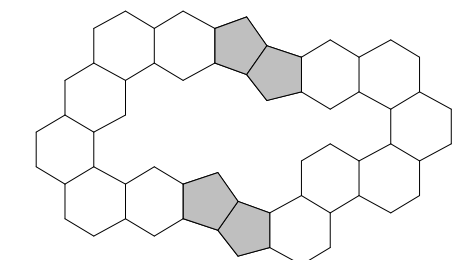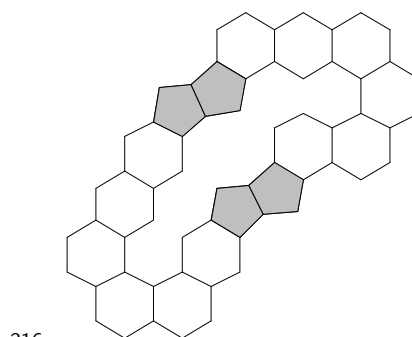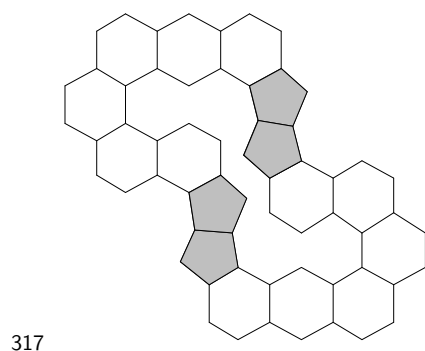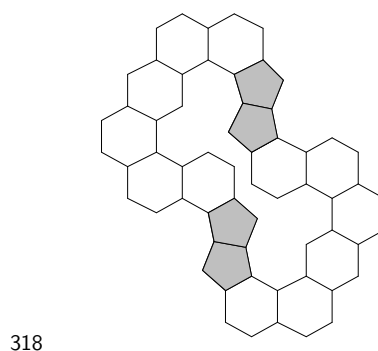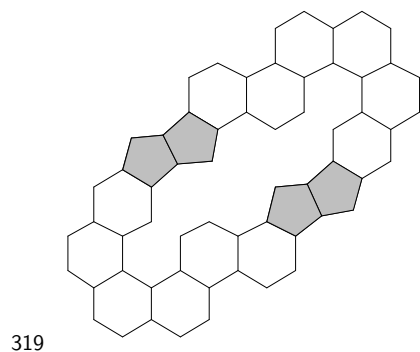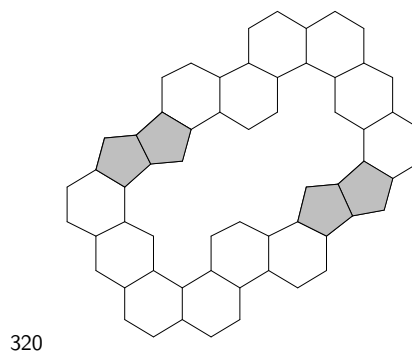



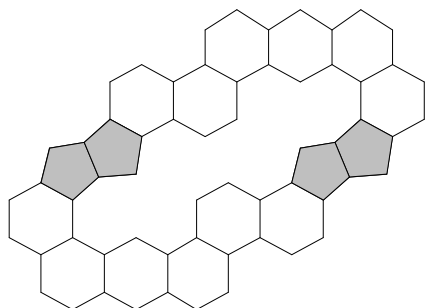

321

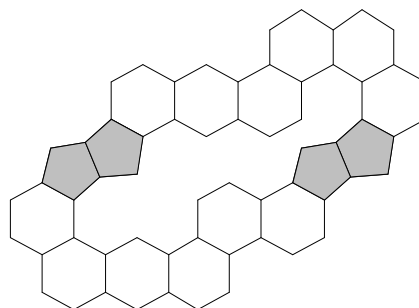

322

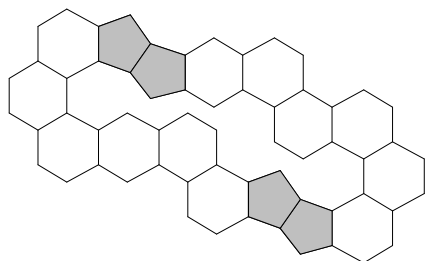

323

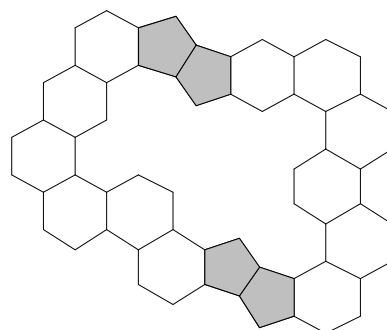

324

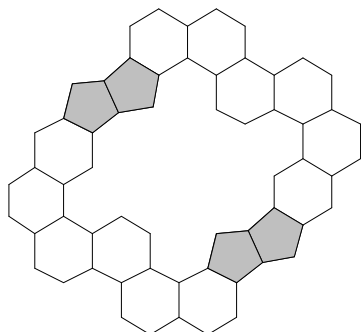

325

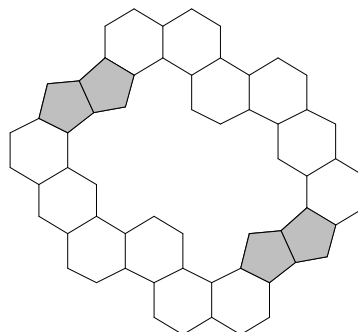

326

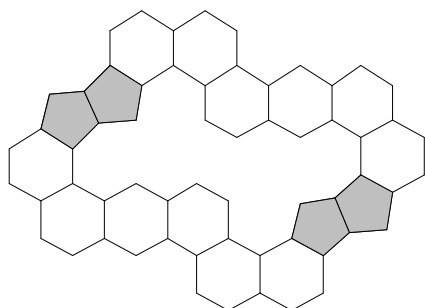

327

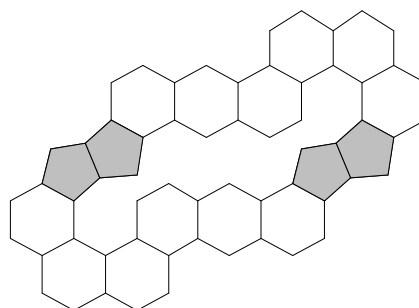

328

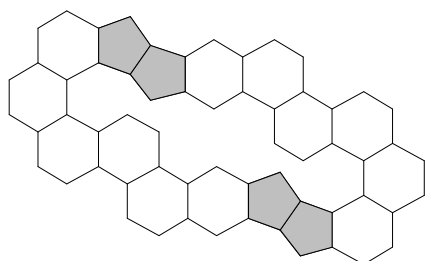

329

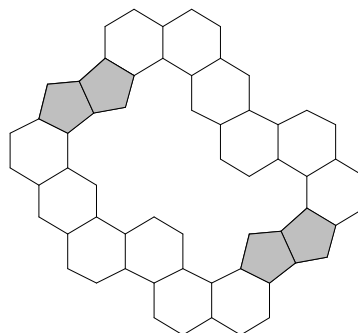

330

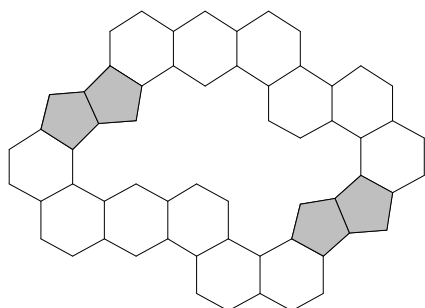

331

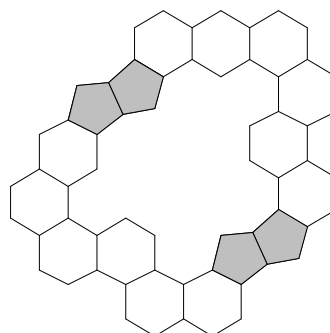

332

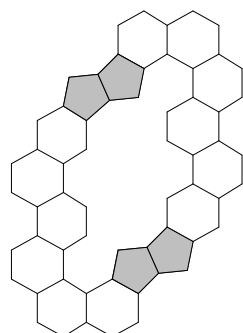

333

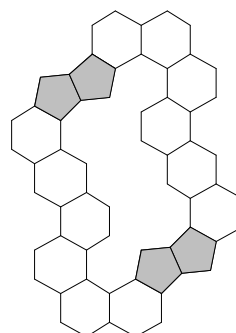

334

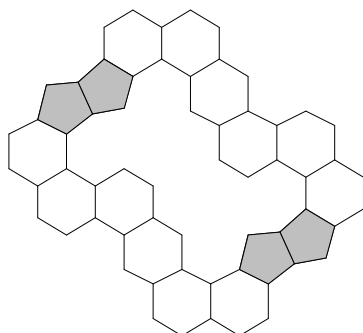

335

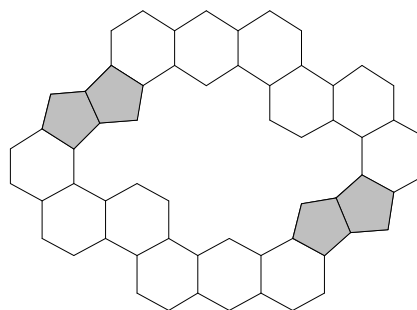

336

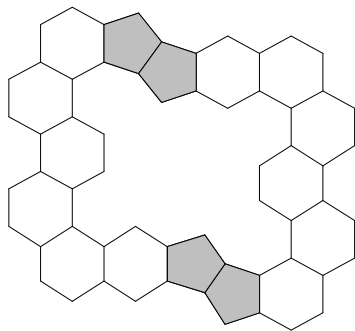

337

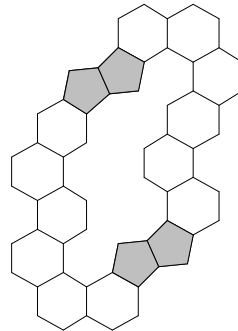

338

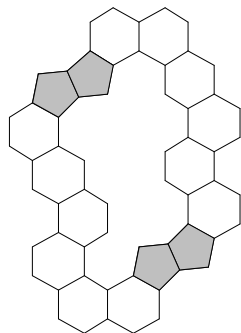

339

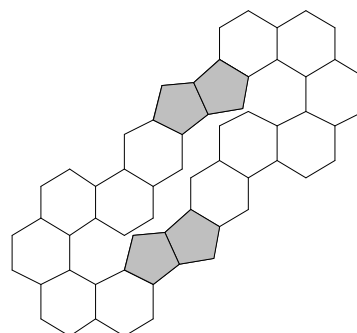

340

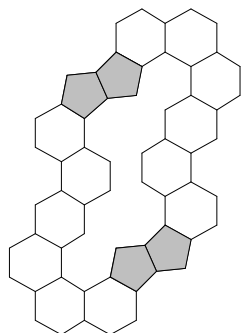

341

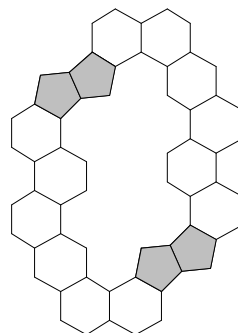

342

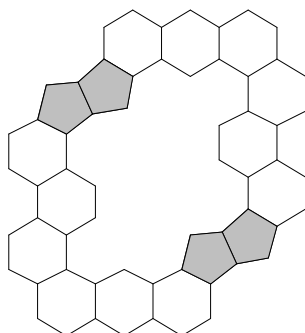

343

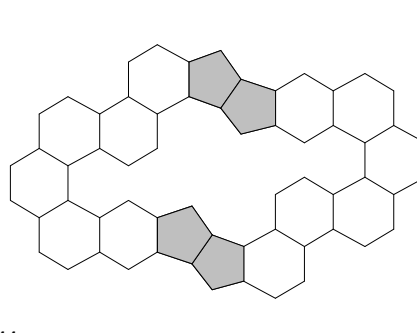

344

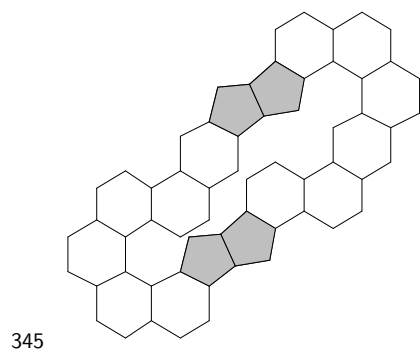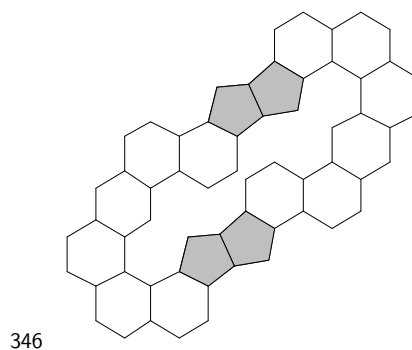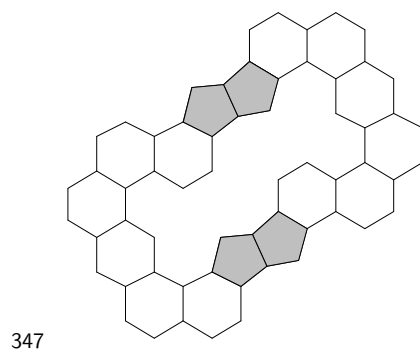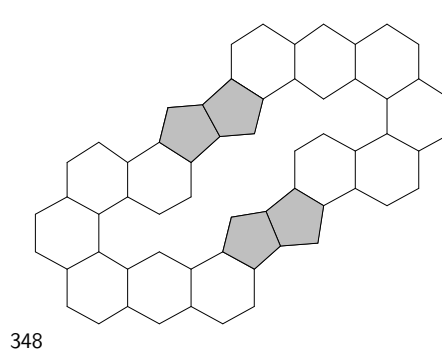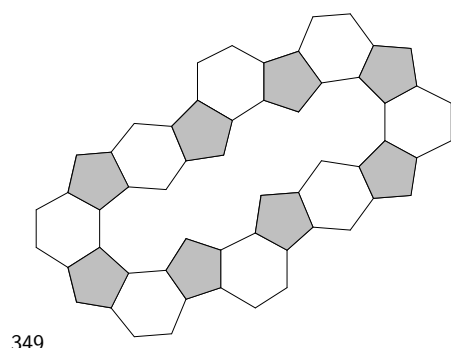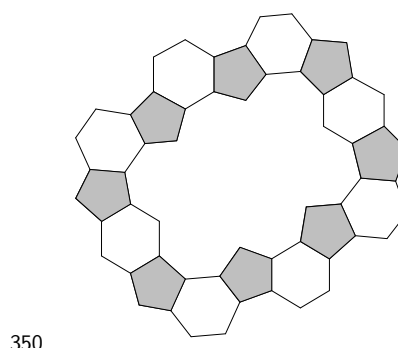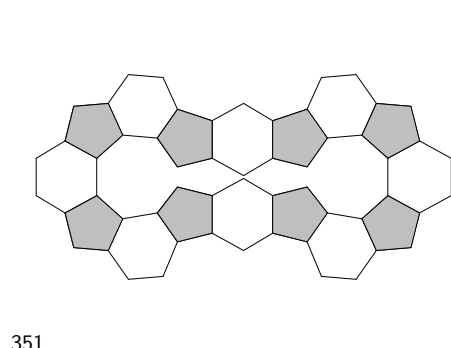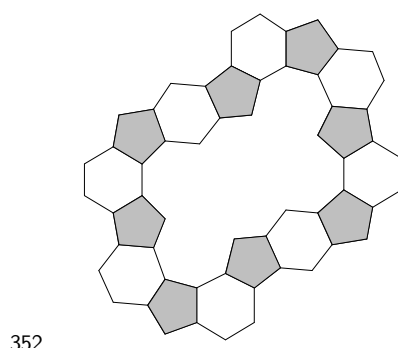

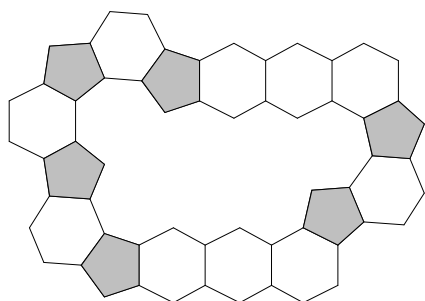

353

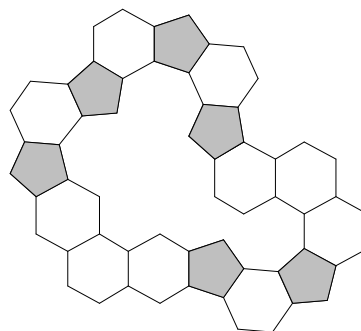

354

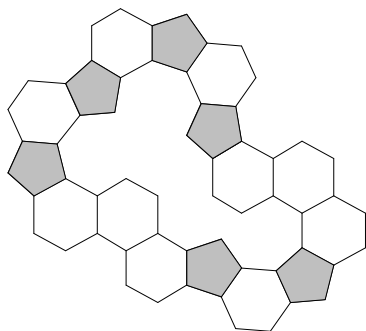

355

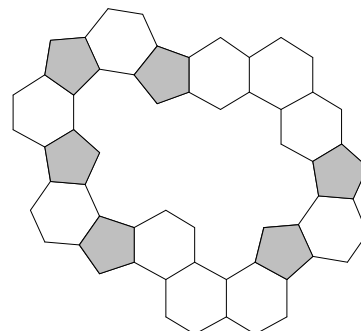

356

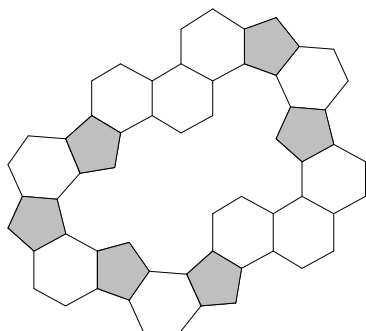

357

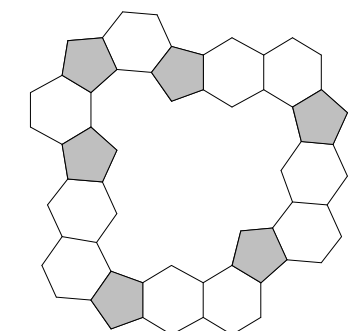

358

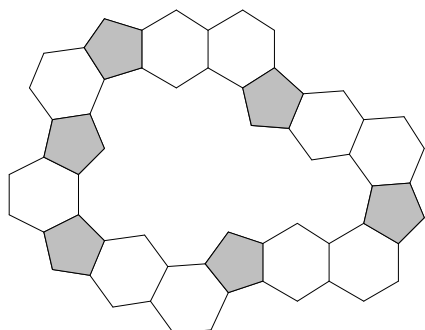

359

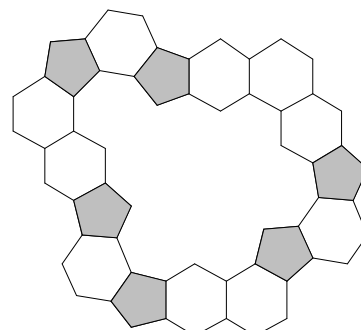

360

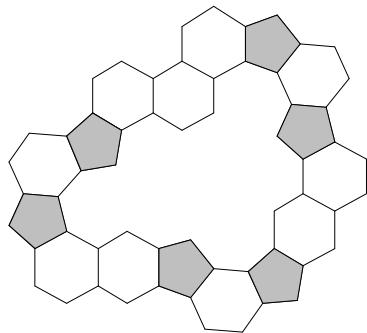

361

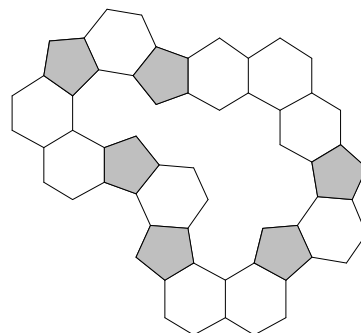

362

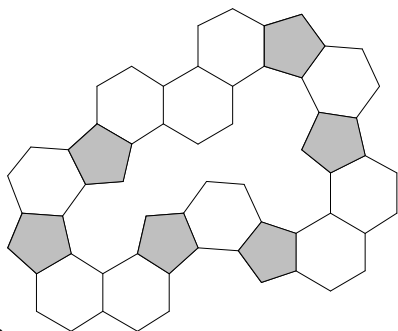

363

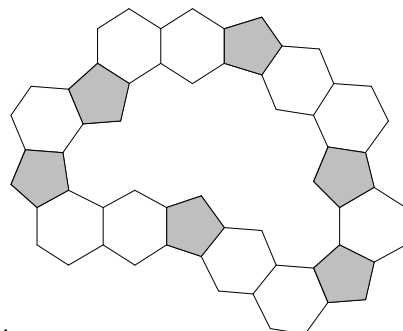

364

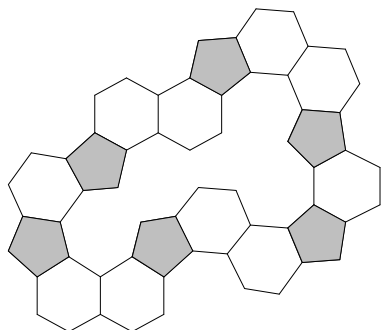

365

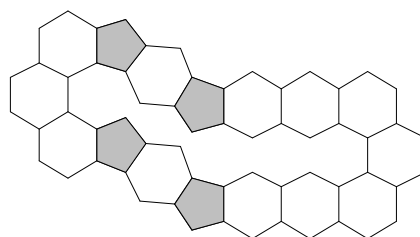

366

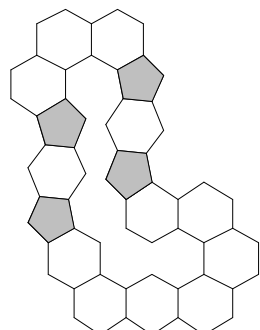

367

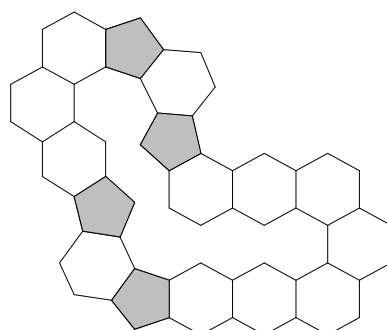

368

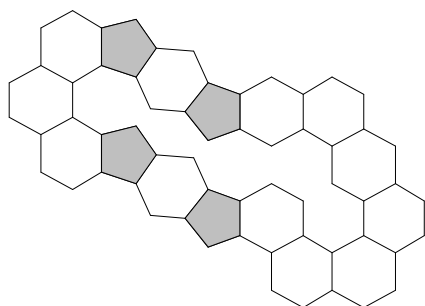

369

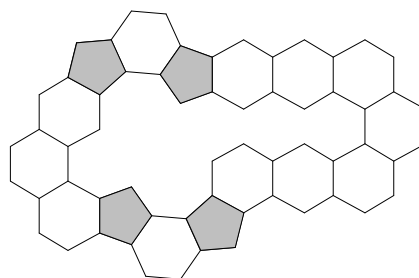

370

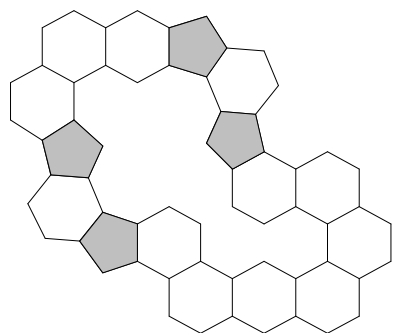

371

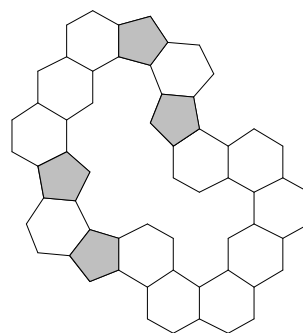

372

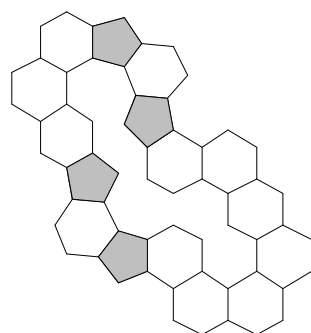

373

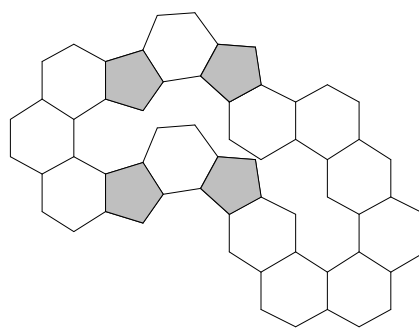

374

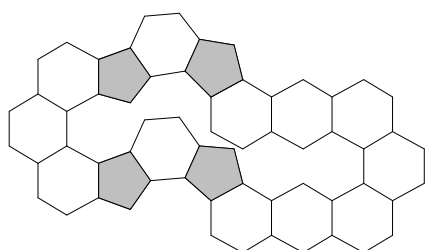

375

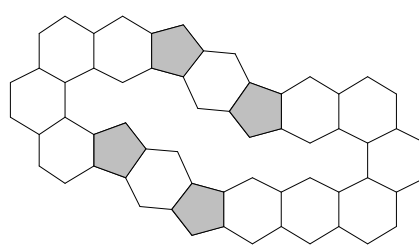

376

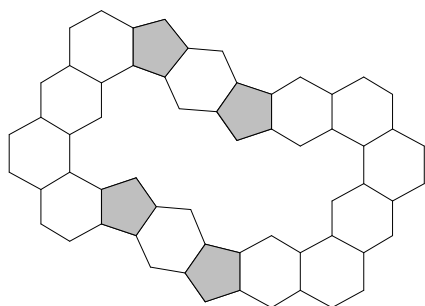

377

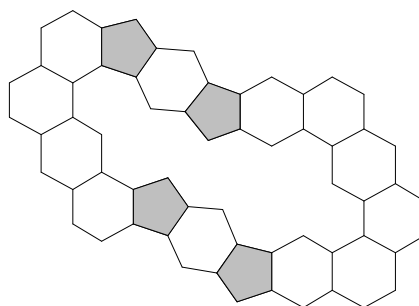

378

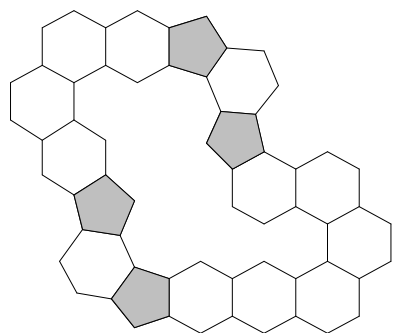

379

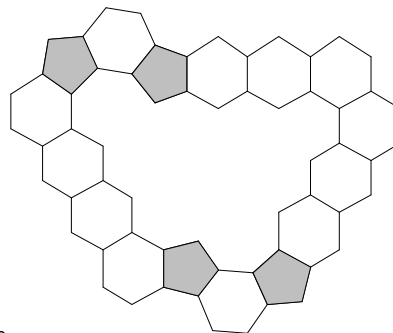

380

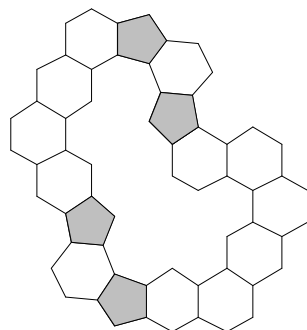

381

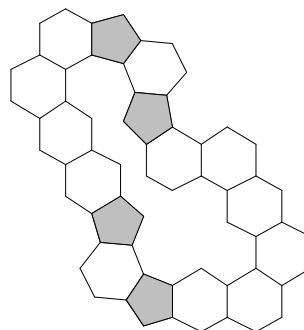

382

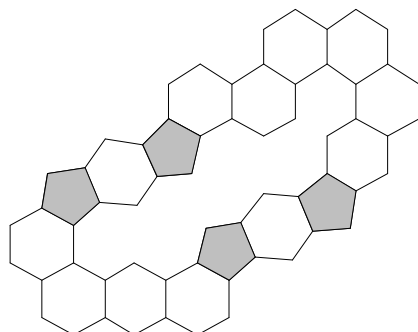

383

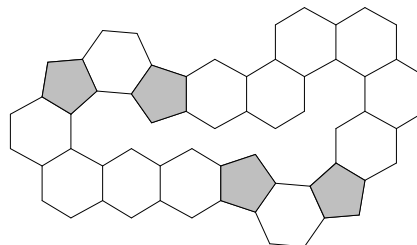

384



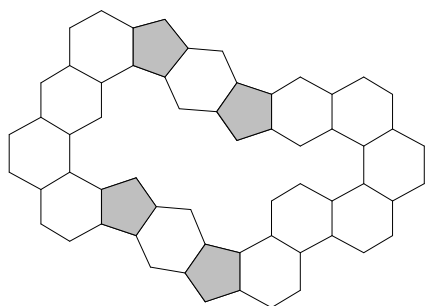

385

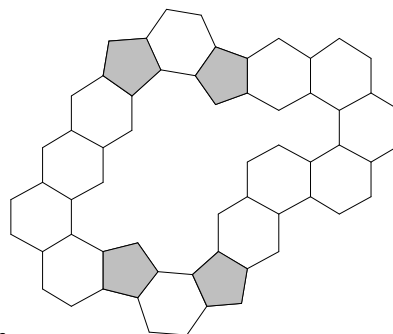

386

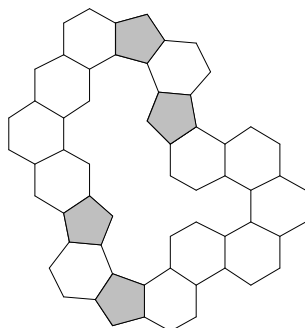

387

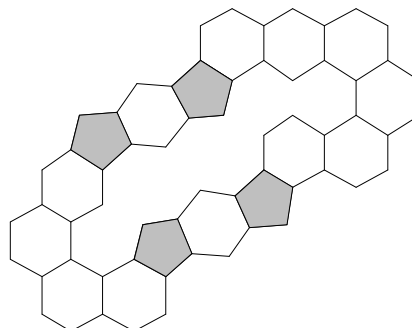

388

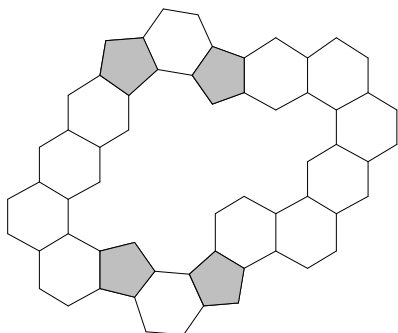

389

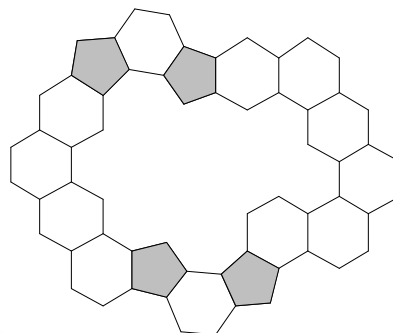

390

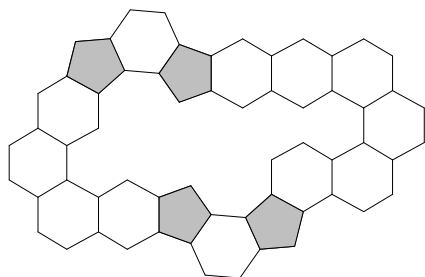

391

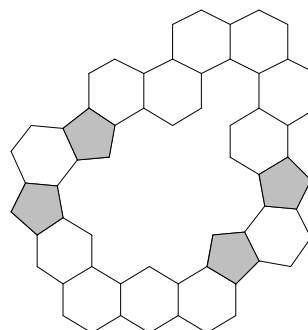

392

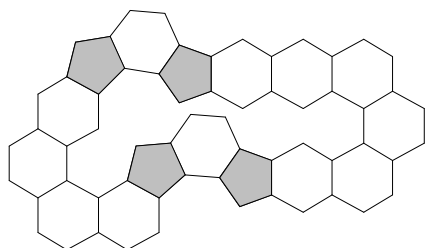

393

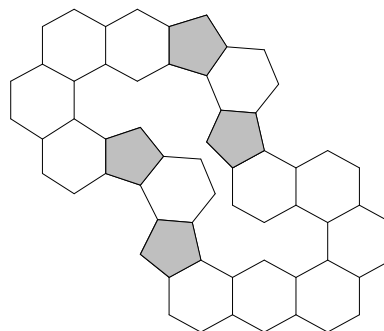

394

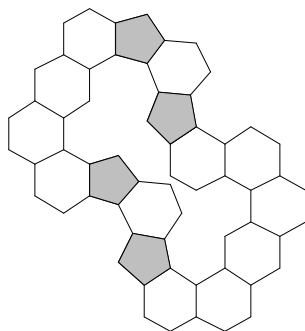

395

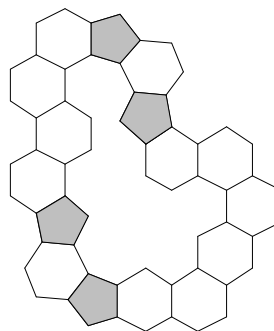

396

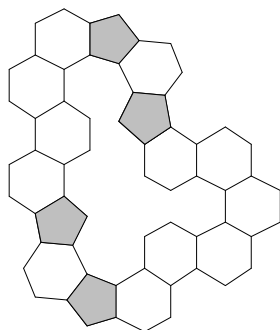

397

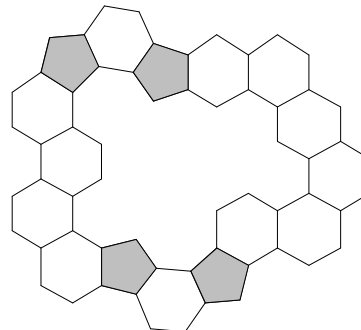

398

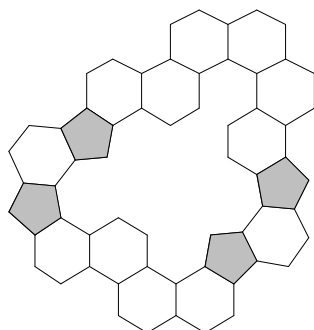

399

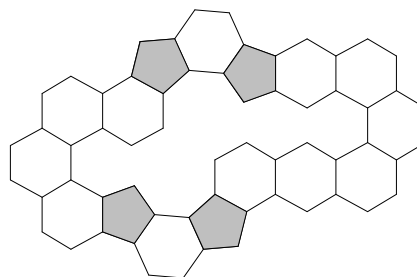

400

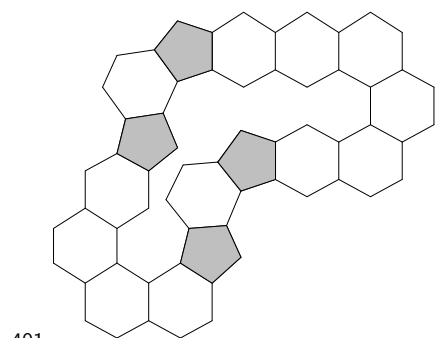

401

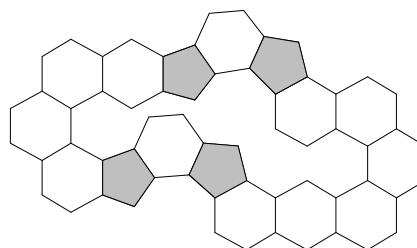

402

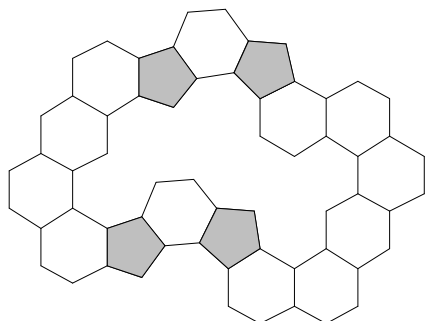

403

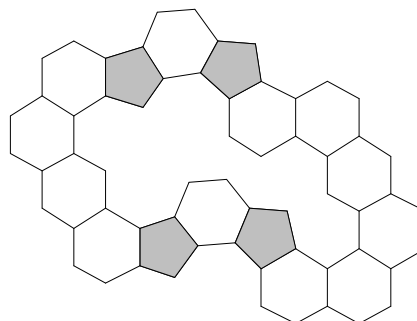

404

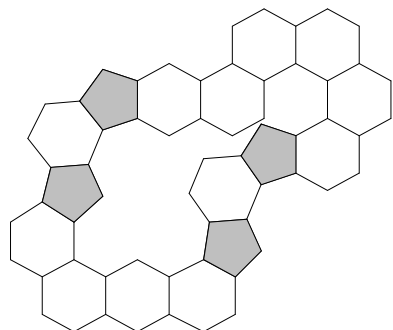

405

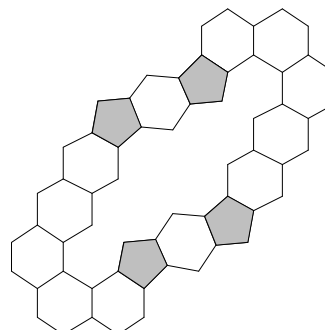

406

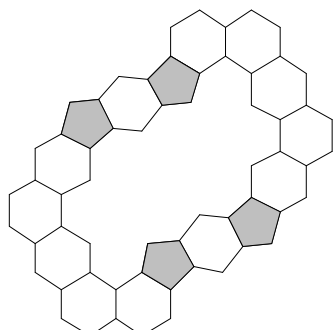

407

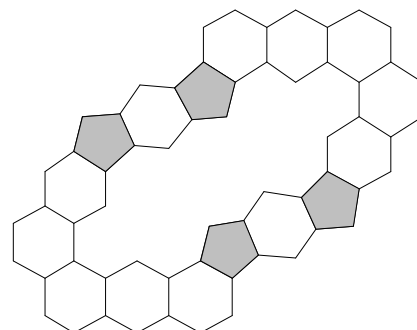

408

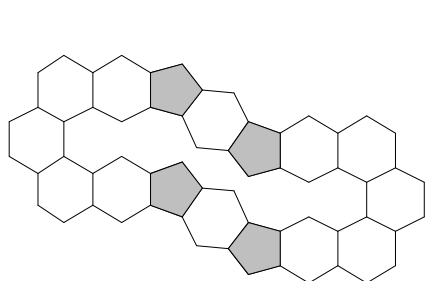

409

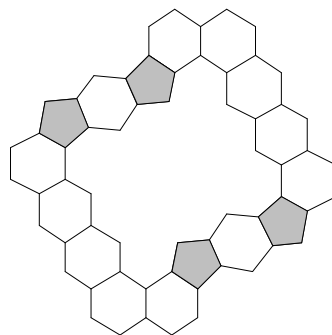

410

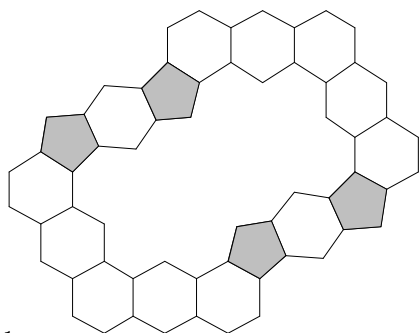

411

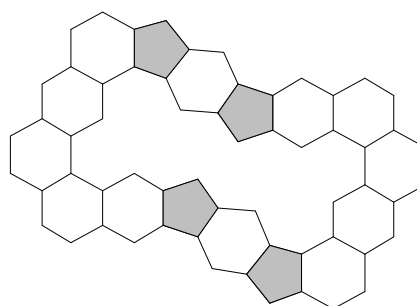

412

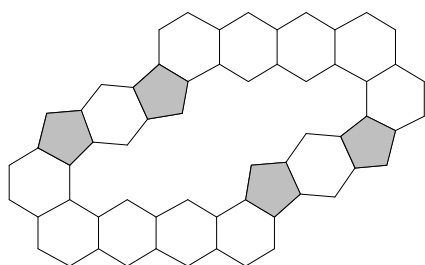

413

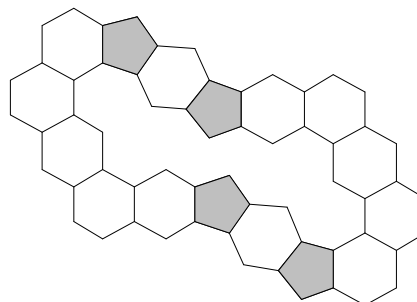

414

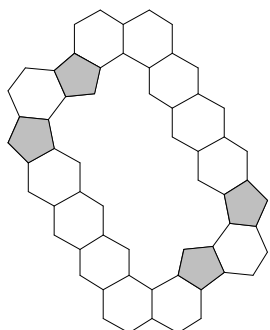

415

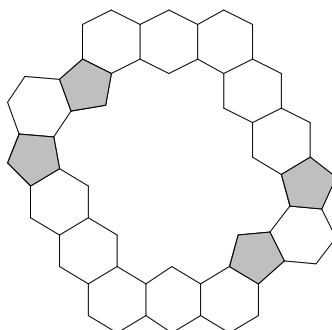

416

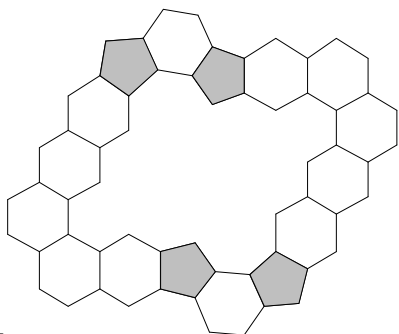

417

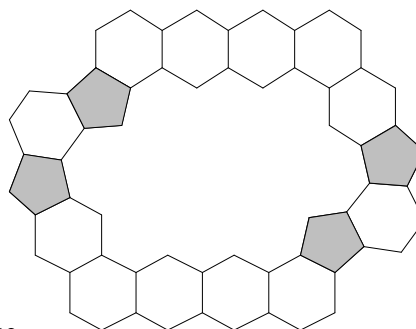

418

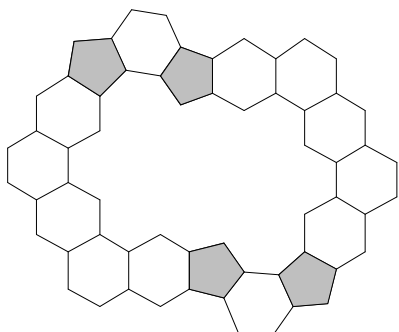

419

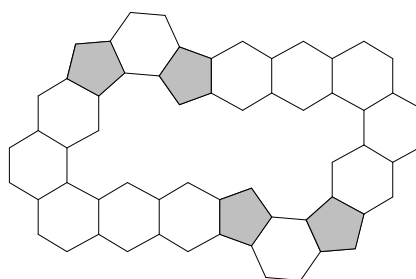

420

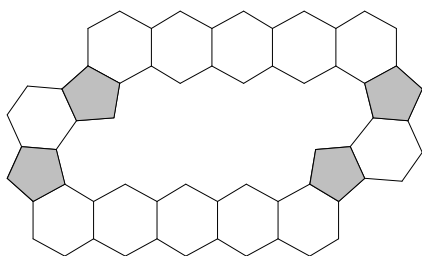

421

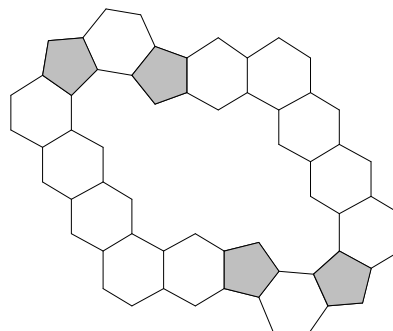

422

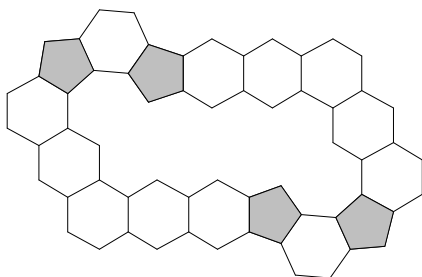

423

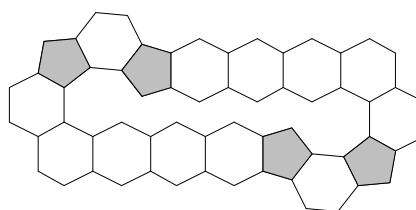

424

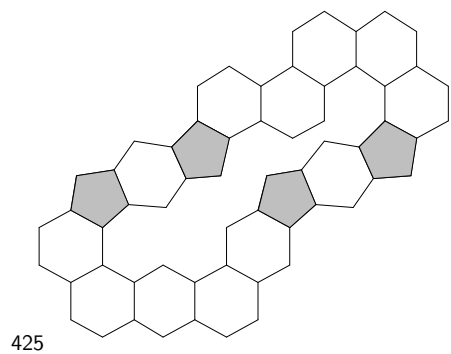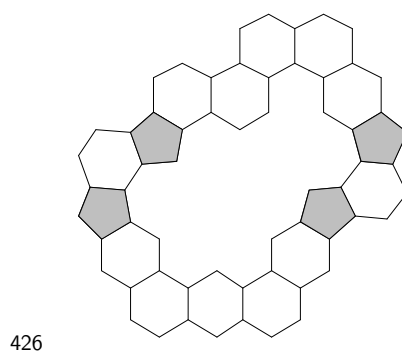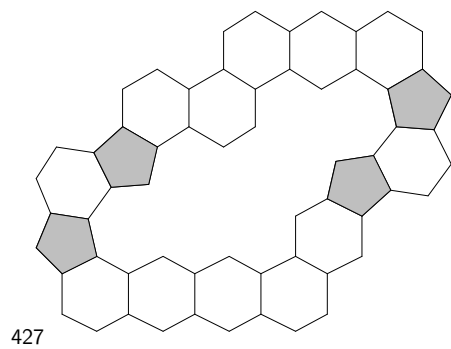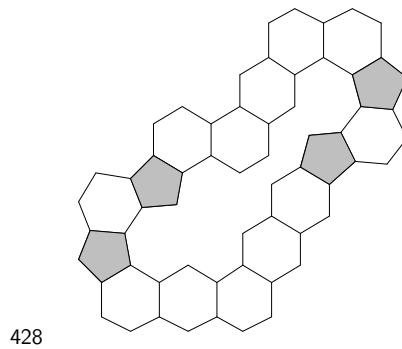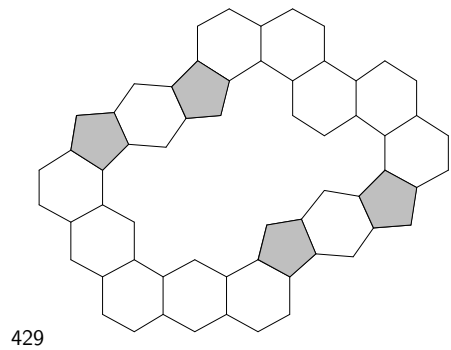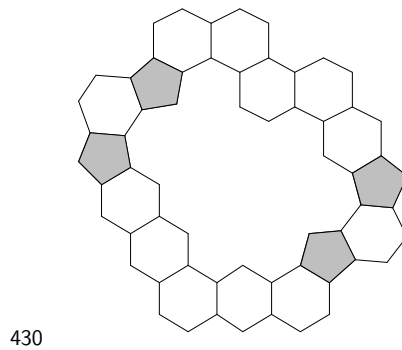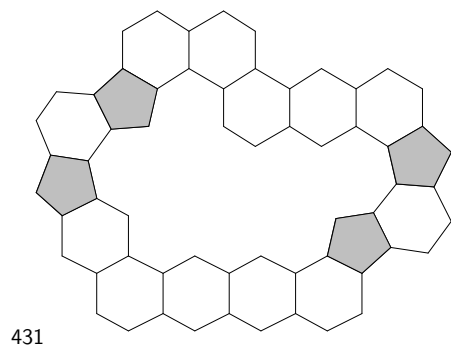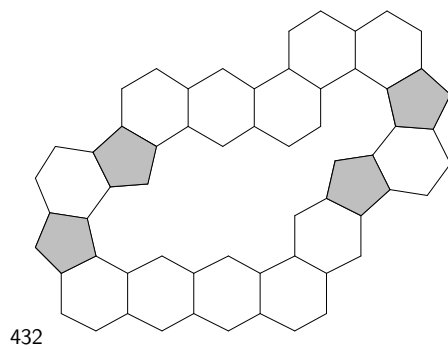

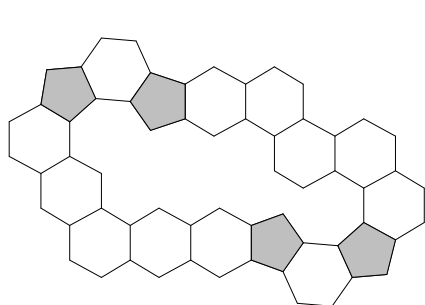

433

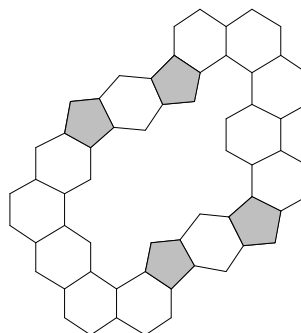

434

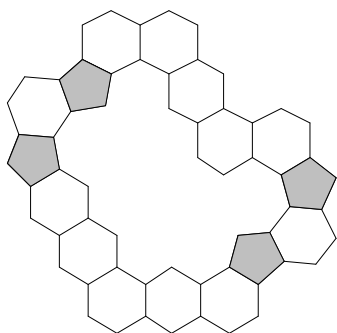

435

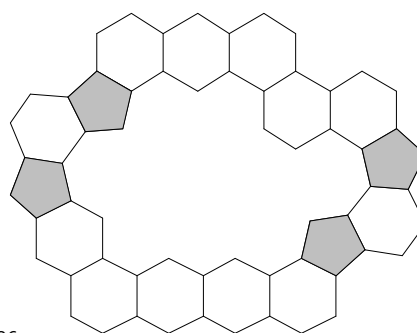

436

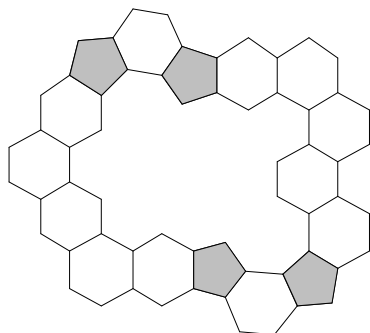

437

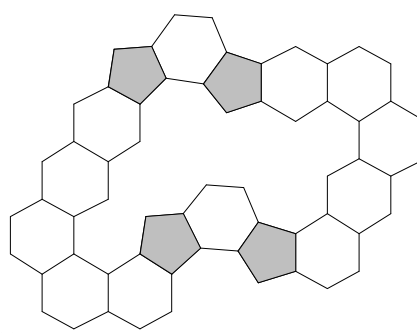

438

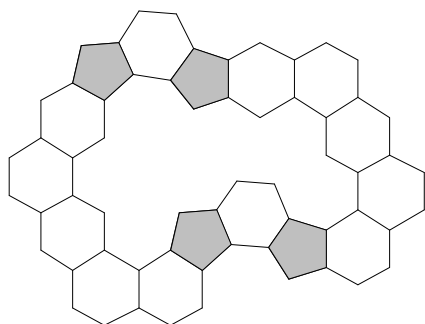

439

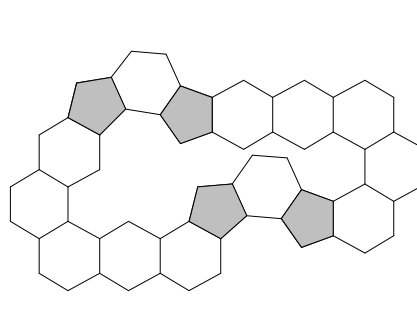

440

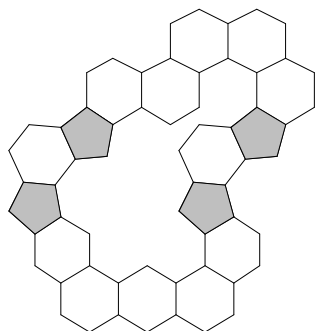

441

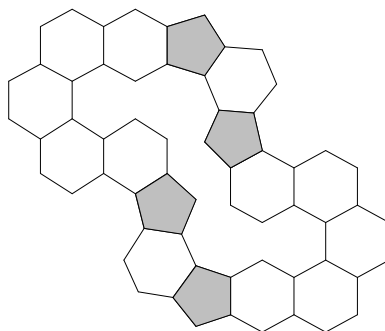

442

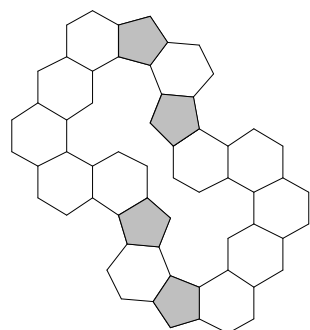

443

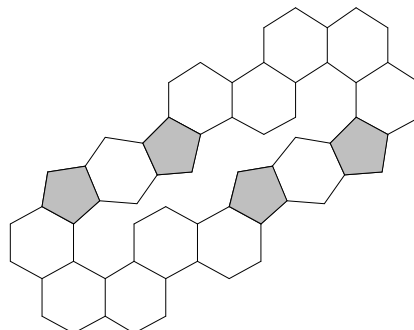

444

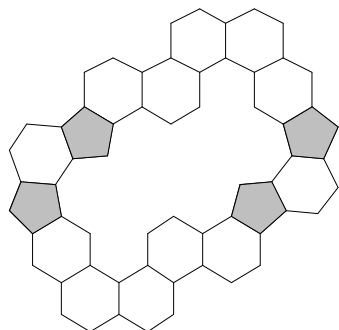

445

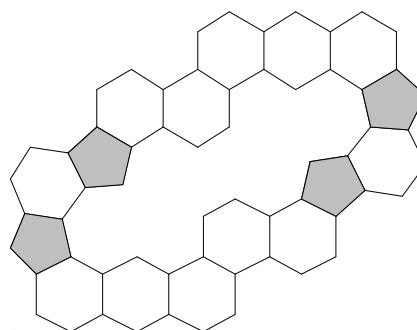

446

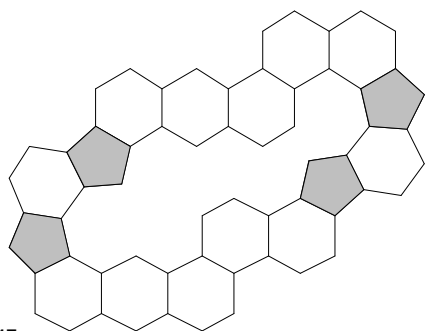

447

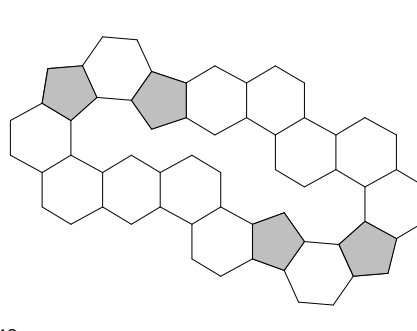

448



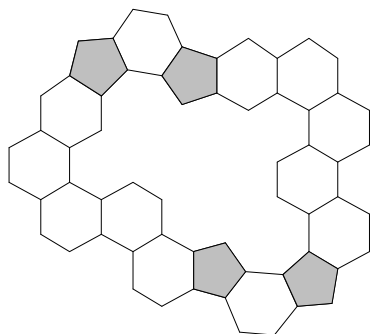

449

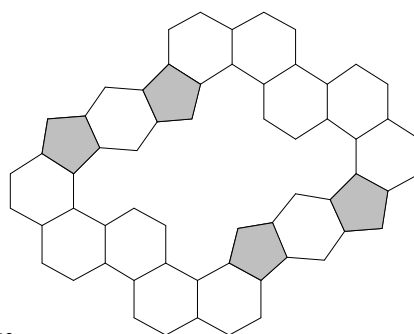

450

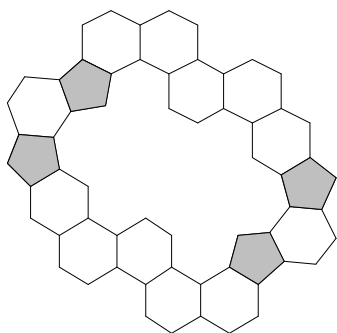

451

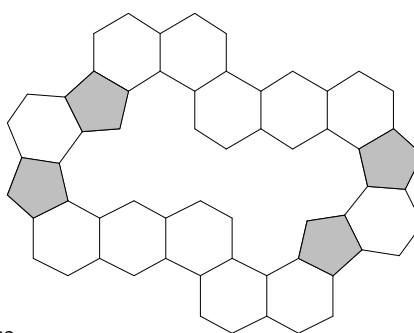

452

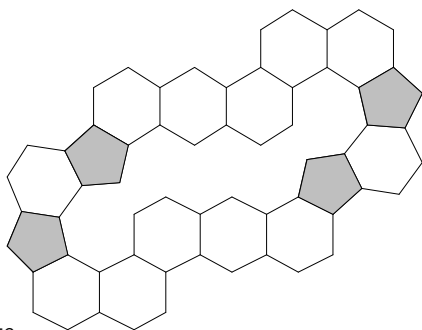

453

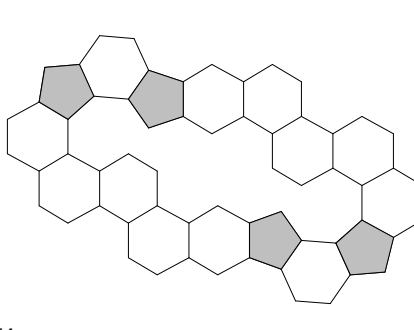

454

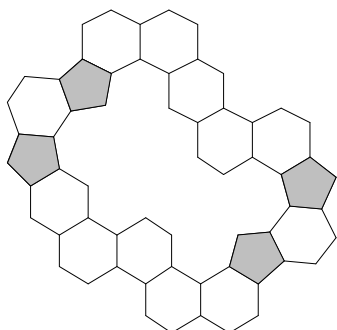

455

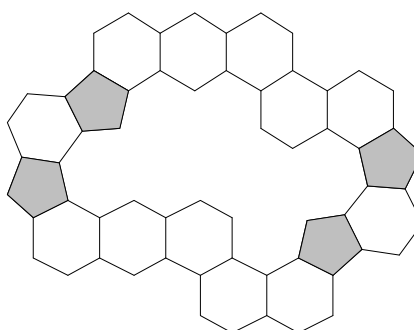

456

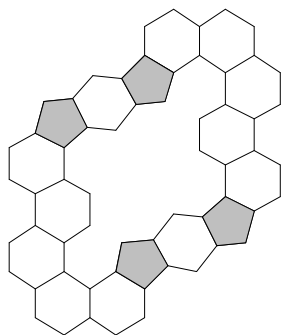

457

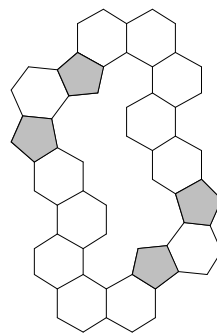

458

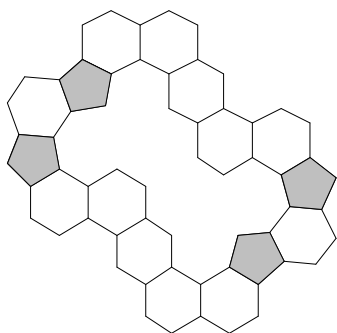

459

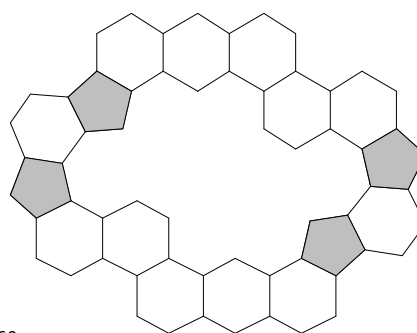

460

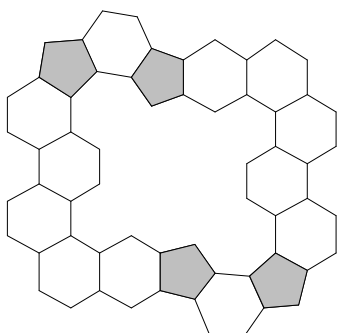

461

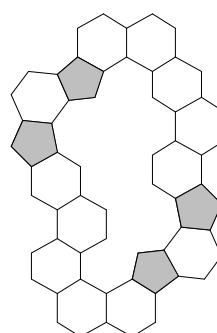

462

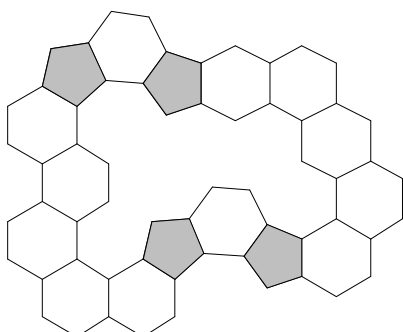

463

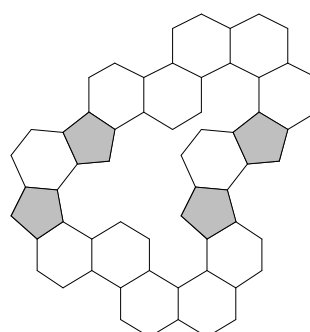

464

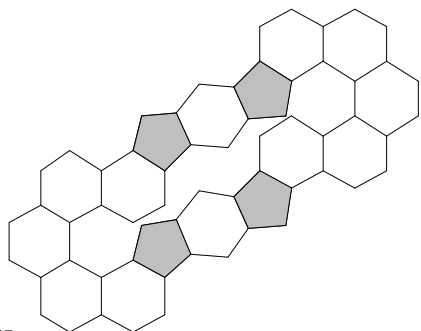

465

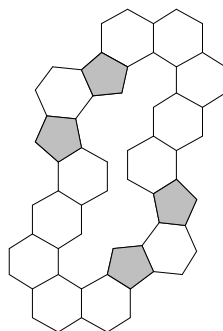

466

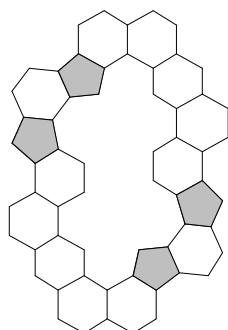

467

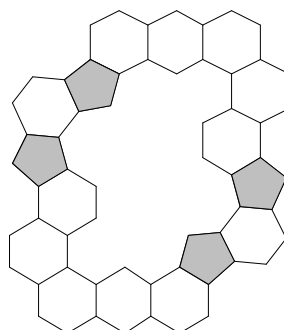

468

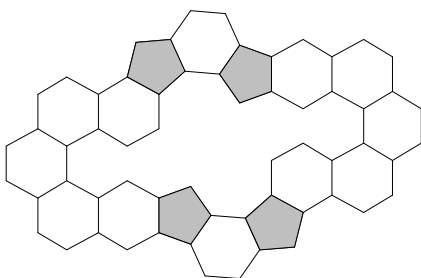

469

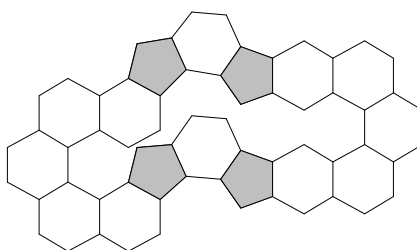

470

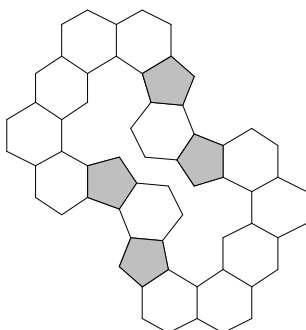

471

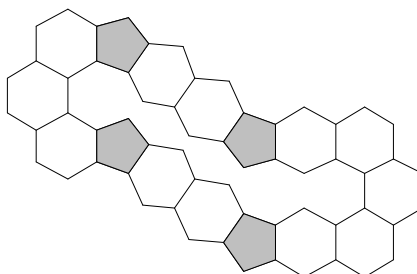

472

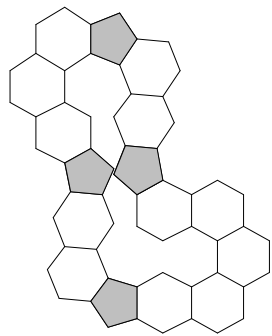

473

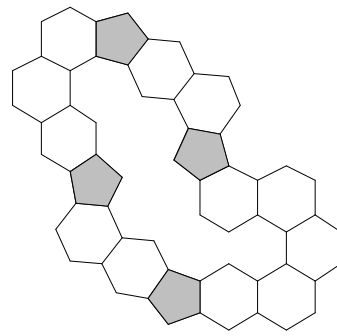

474

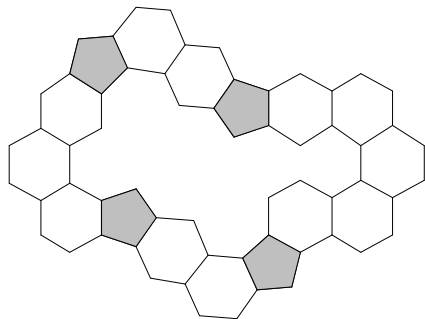

475

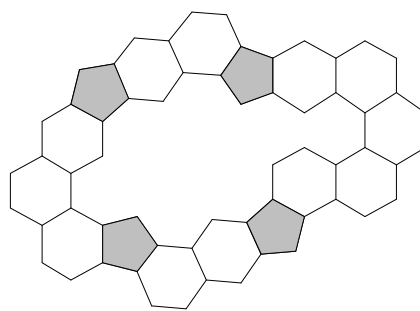

476

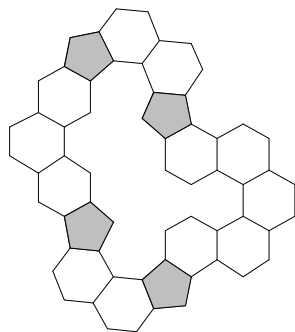

477

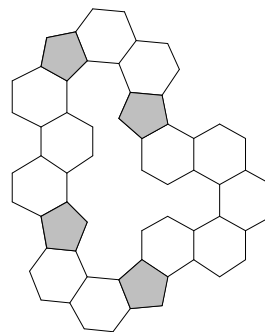

478

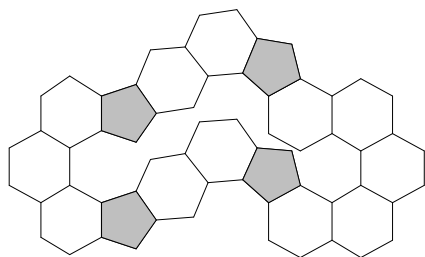

479

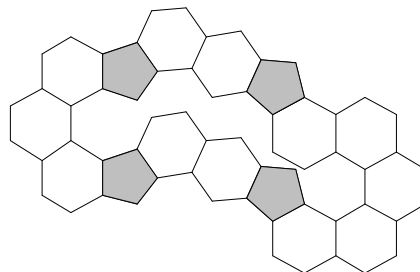

480

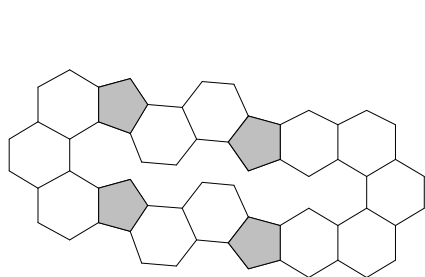

481

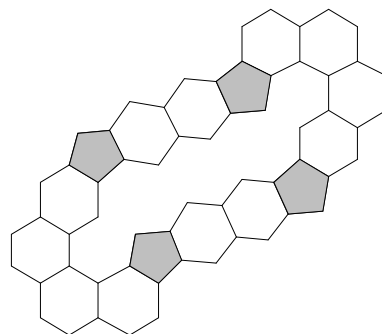

482

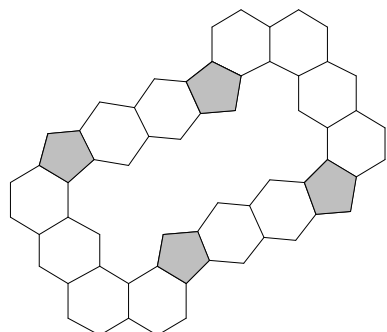

483

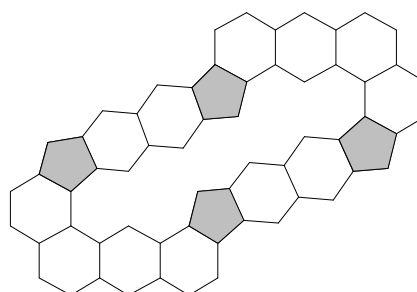

484

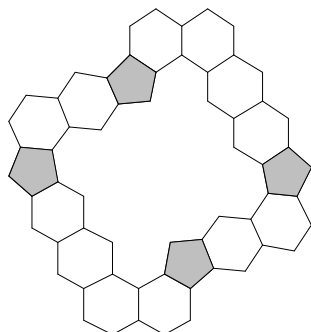

485

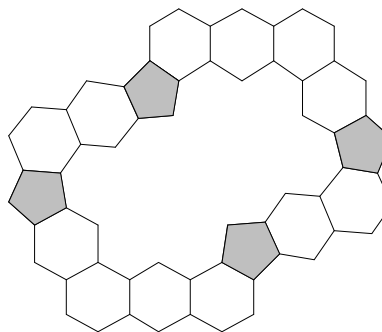

486

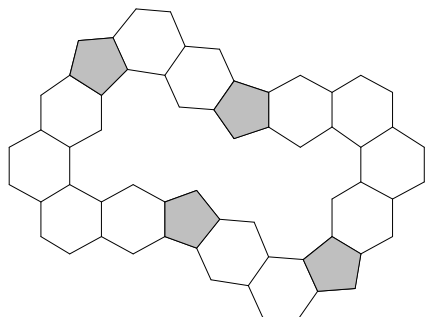

487

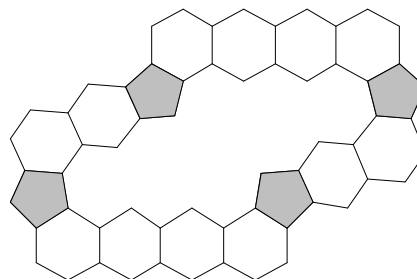

488

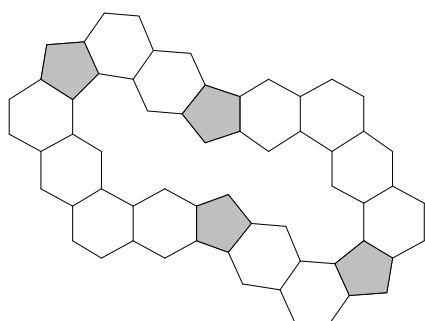

489

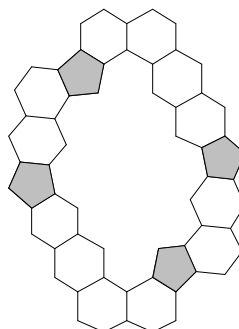

490

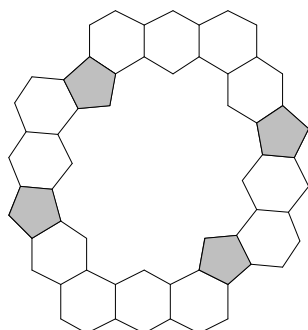

491

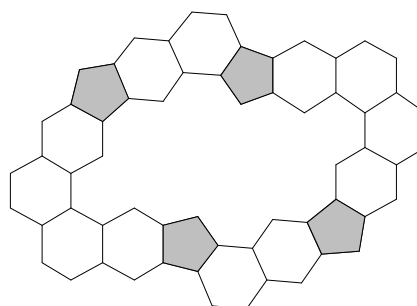

492

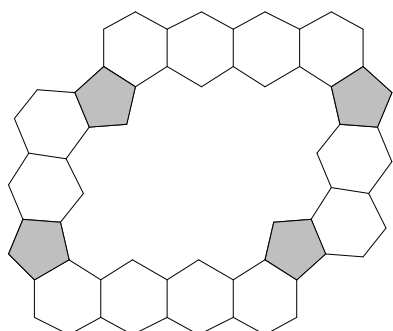

493

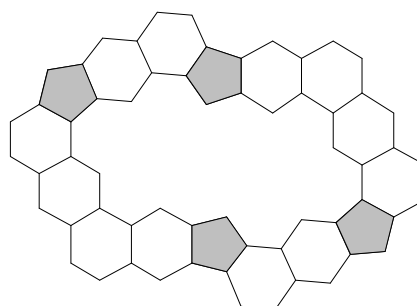

494

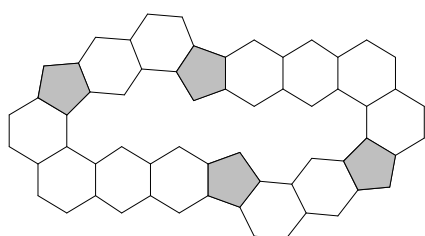

495

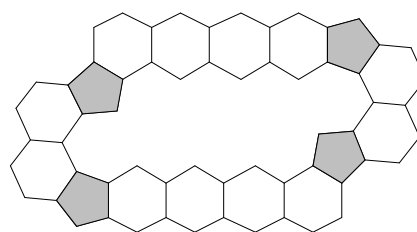

496

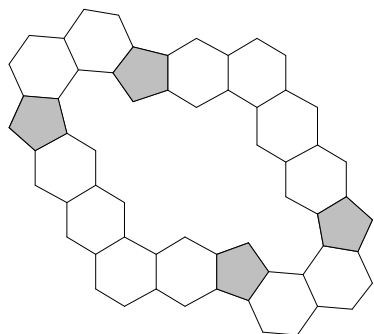

497

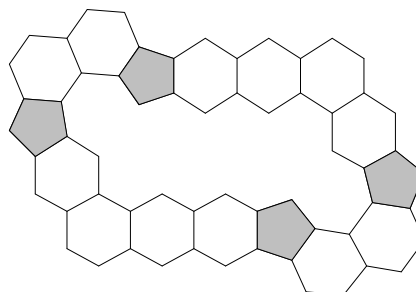

498

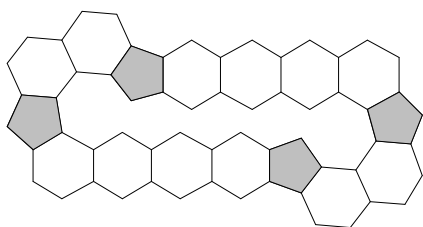

499

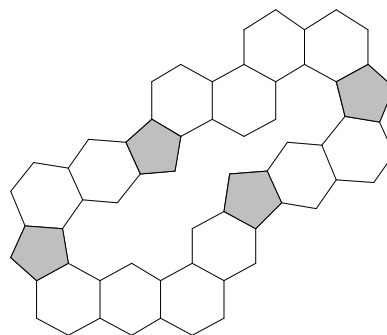

500

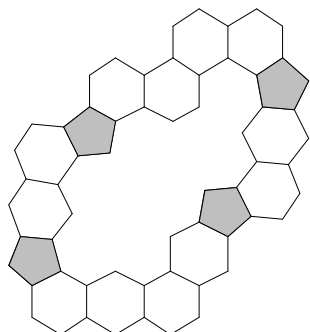

501

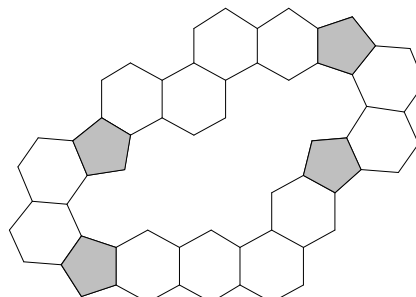

502

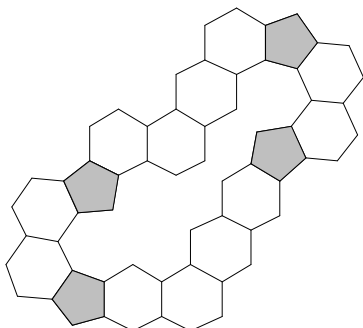

503

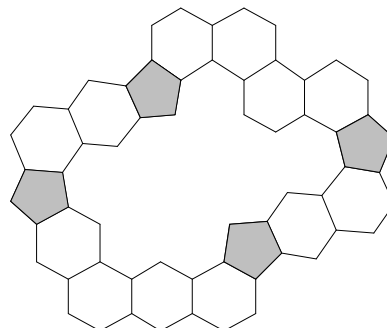

504

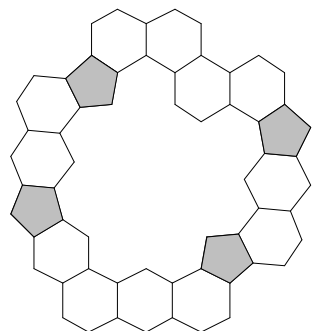

505

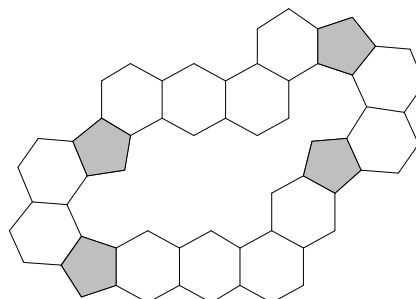

506

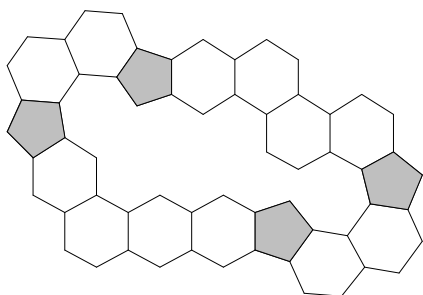

507

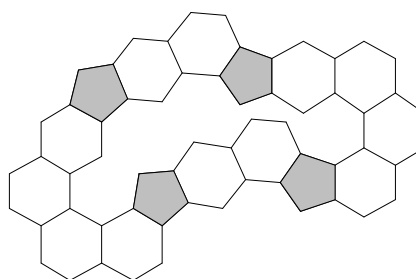

508

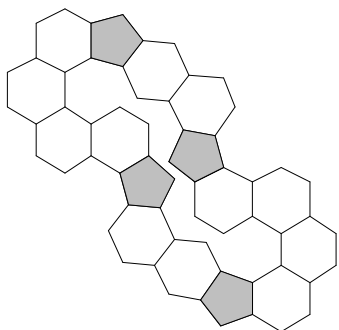

509

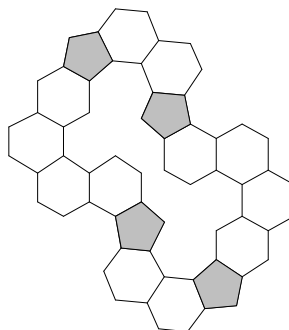

510

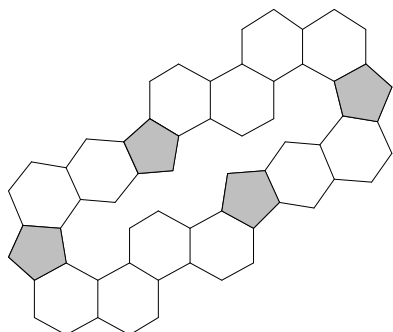

511

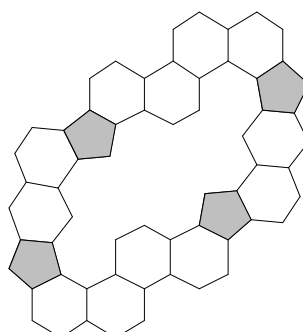

512



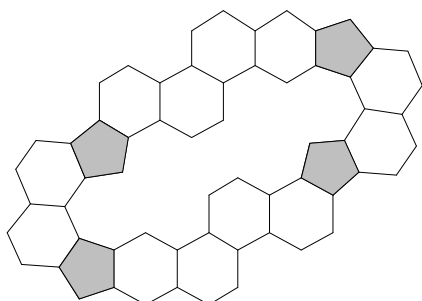

513

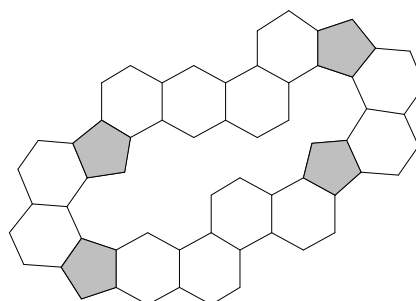

514

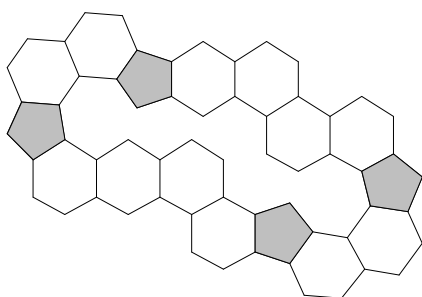

515

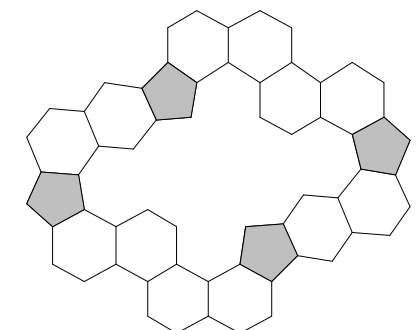

516

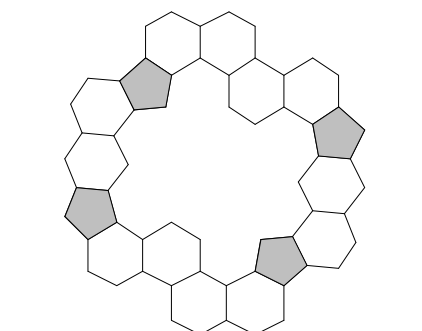

517

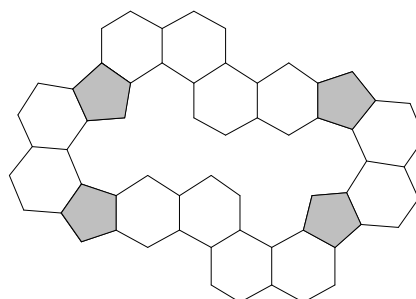

518

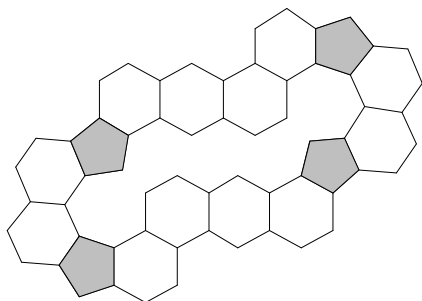

519

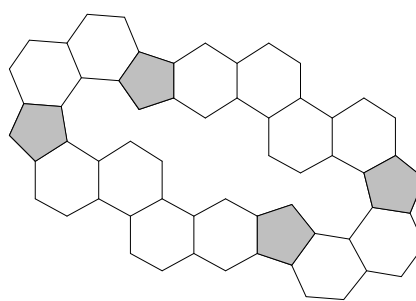

520

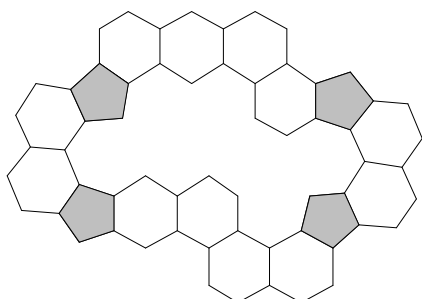

521

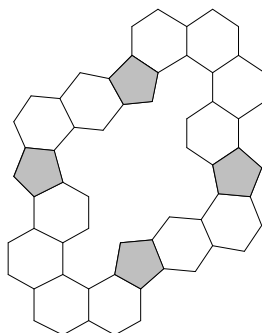

522

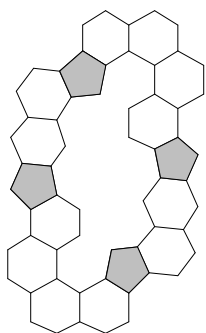

523

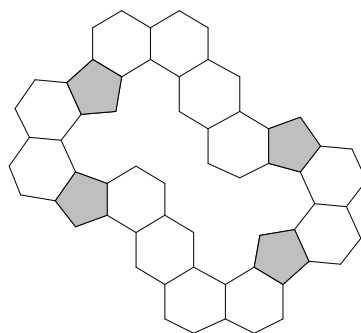

524

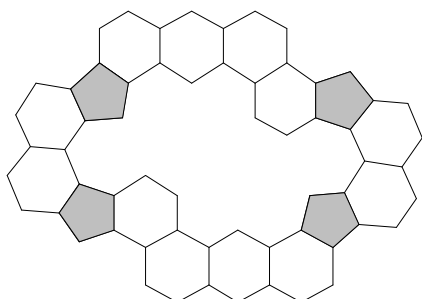

525

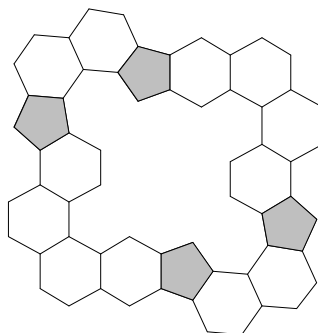

526

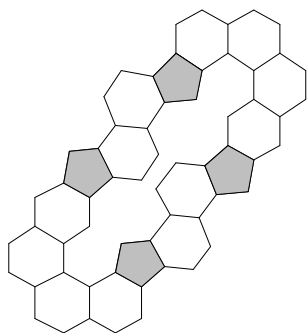

527

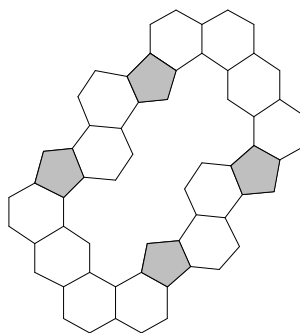

528

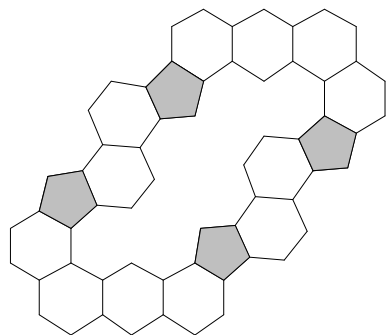

529

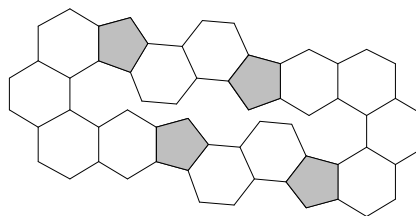

530

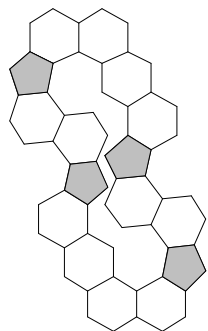

531

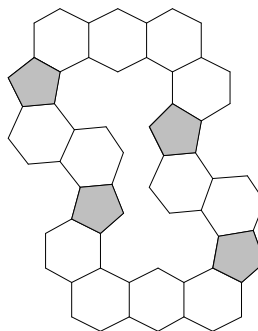

532

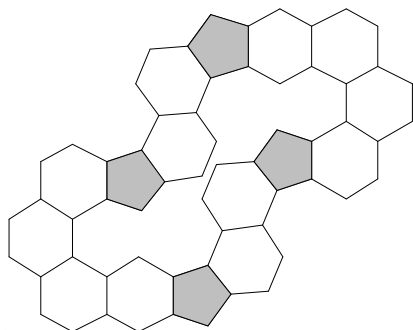

533

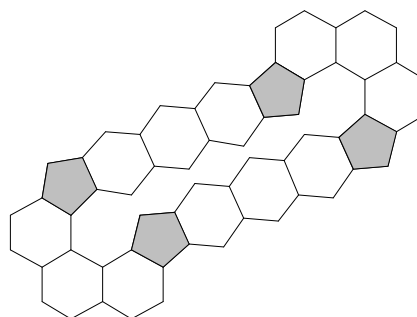

534

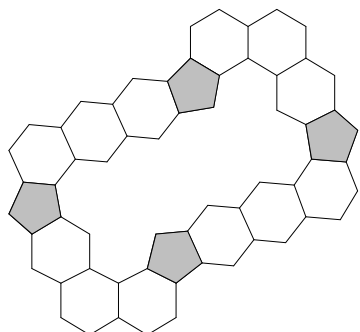

535

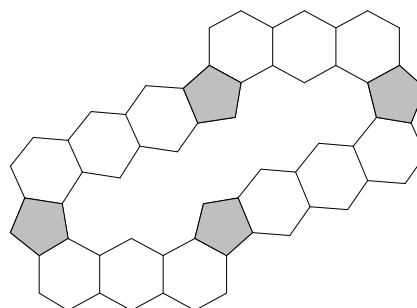

536

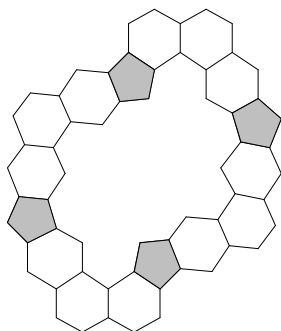

537

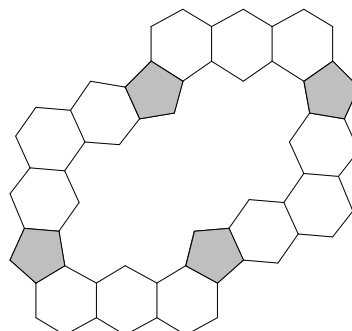

538

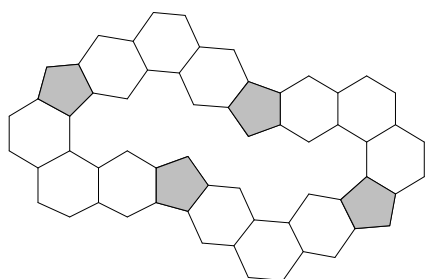

539

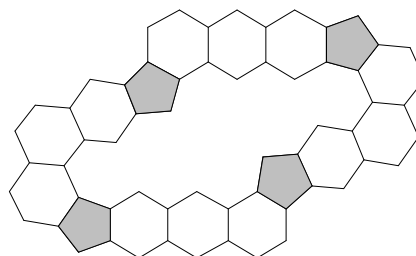

540

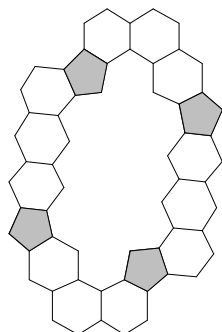

541

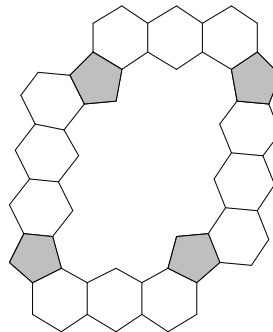

542

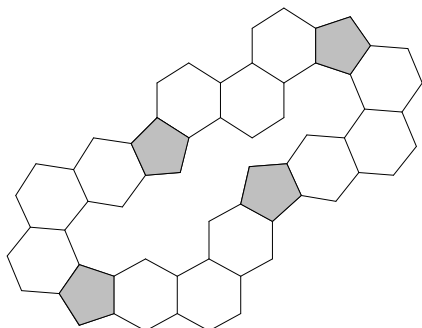

543

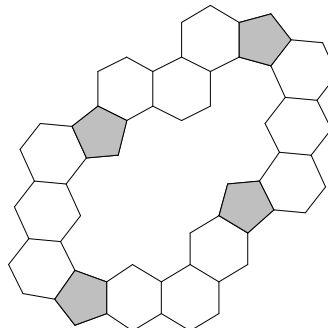

544

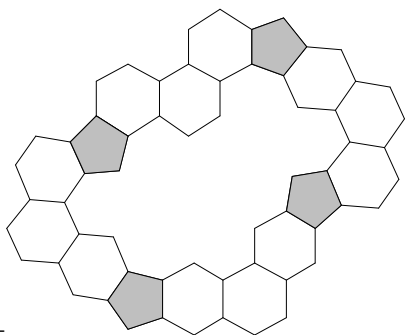

545

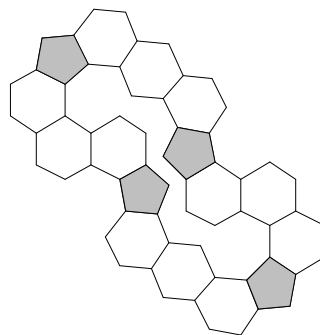

546

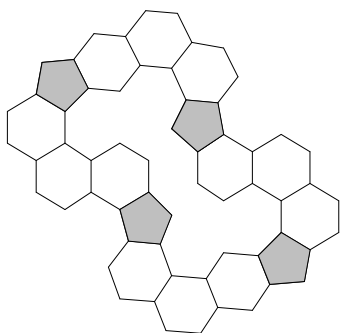

547

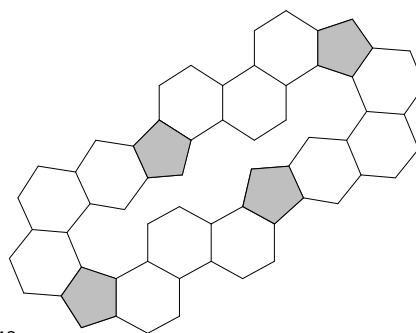

548

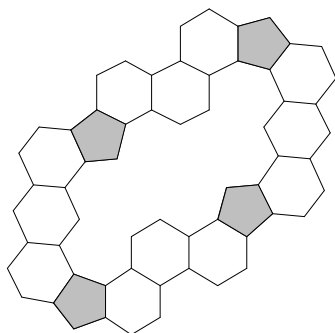

549

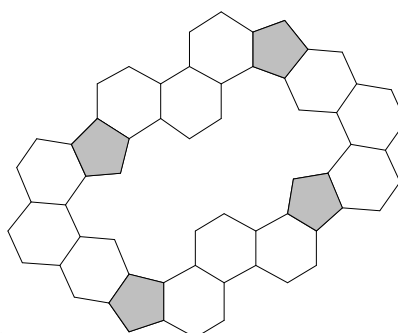

550

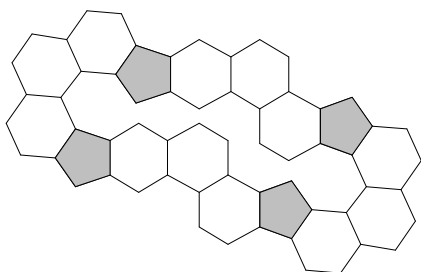

551

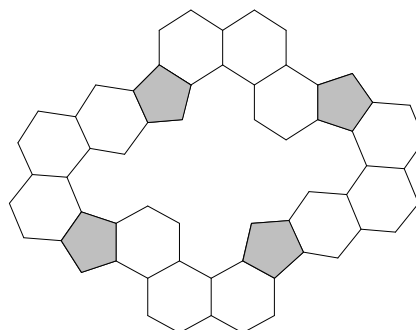

552

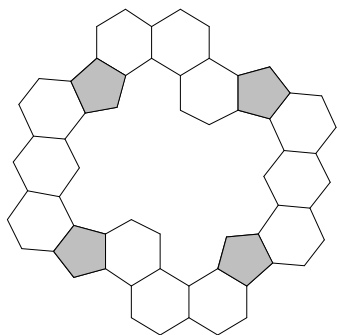

553

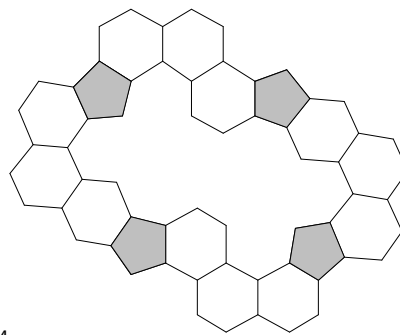

554

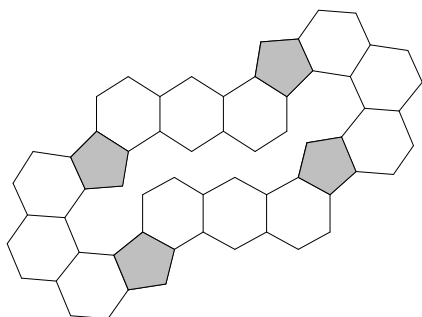

555

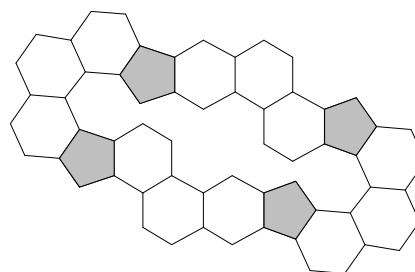

556

Supplement: s1 [file s1]

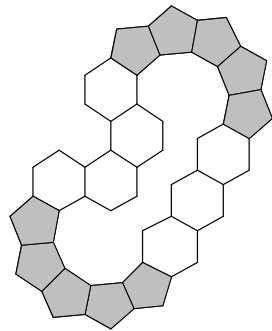

1

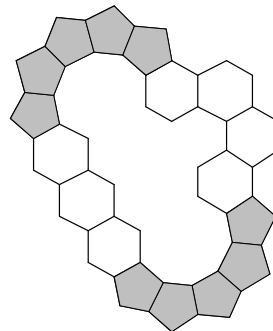

2

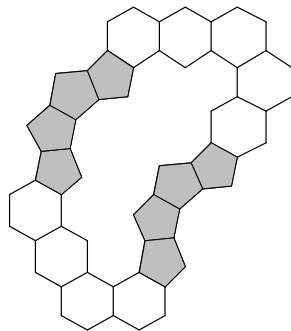

3

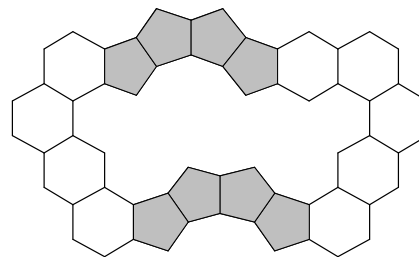

4

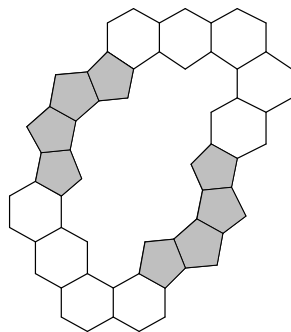

5

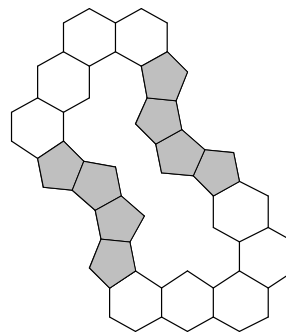

6

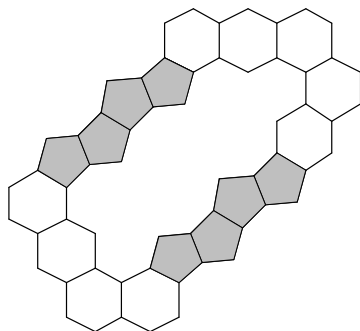

7

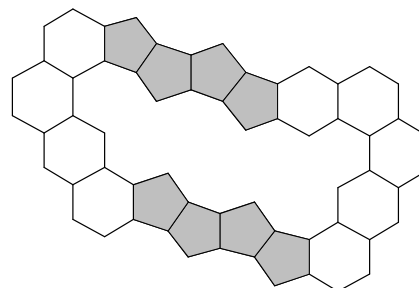

8

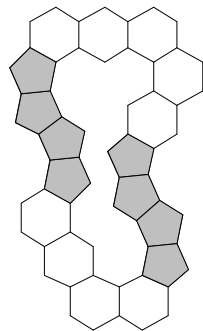

9

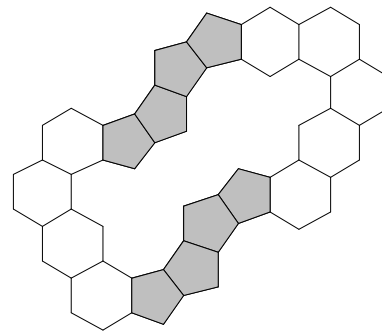

10

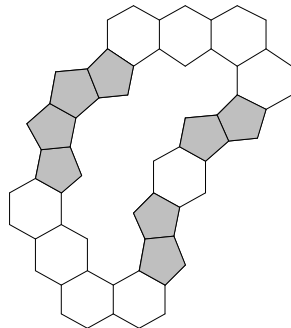

11

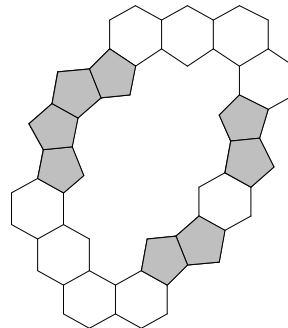

12

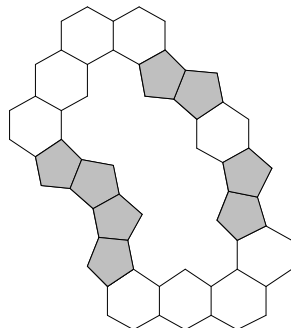

13

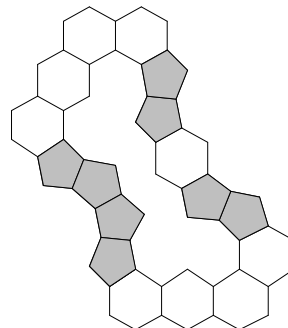

14

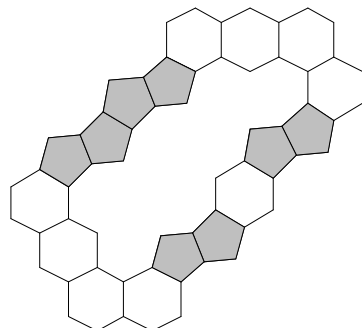

15

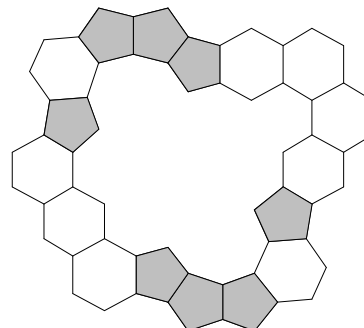

16

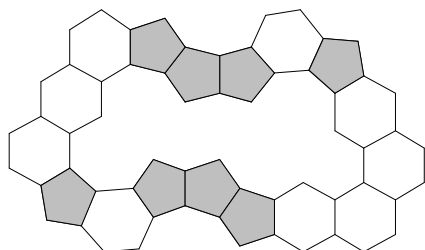

17

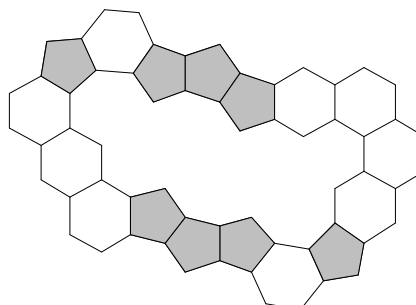

18

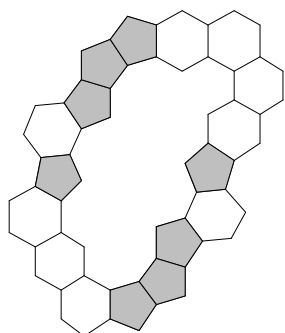

19

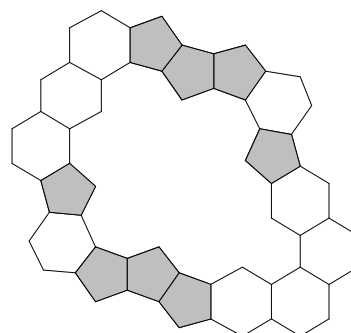

20

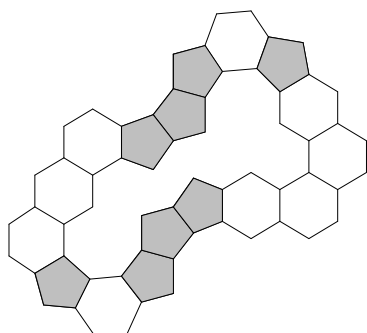

21

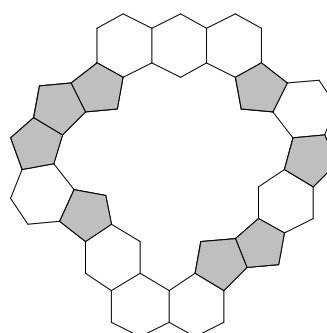

22

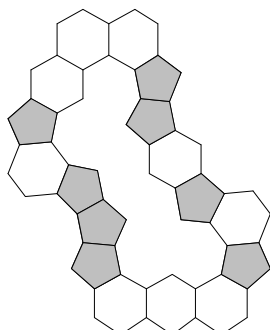

23

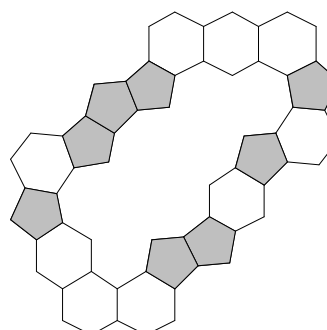

24

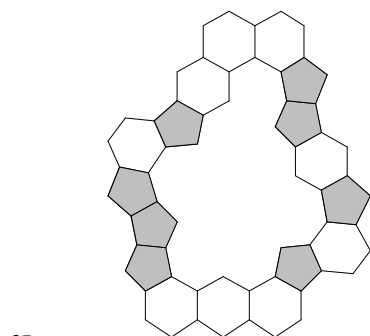

25

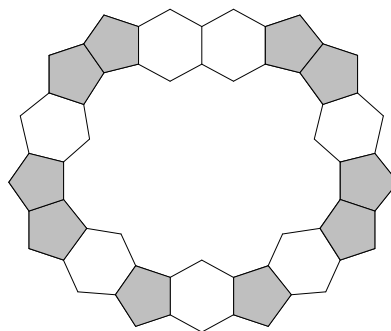

26

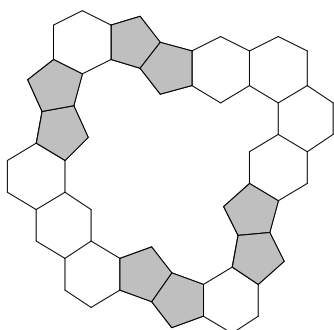

27

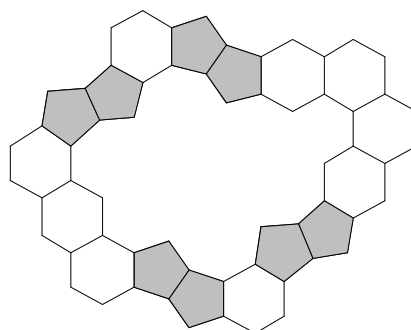

28

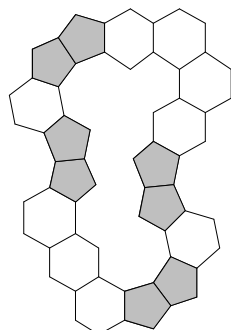

29

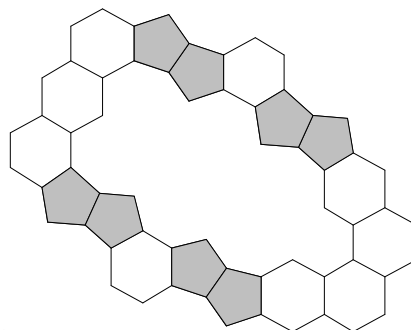

30

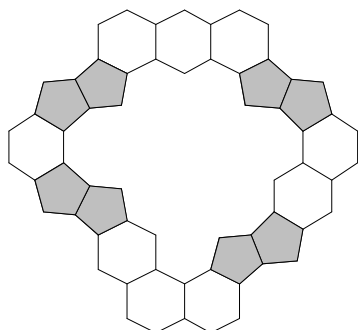

31

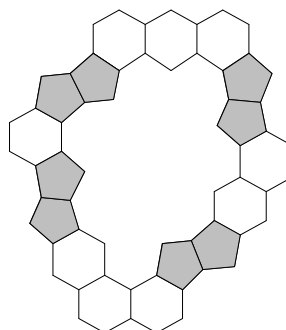

32

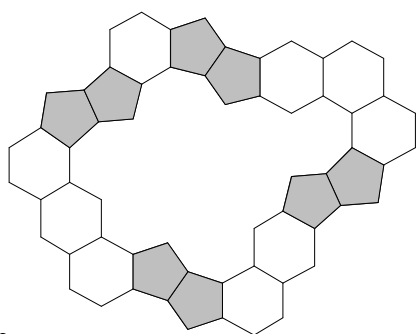

33

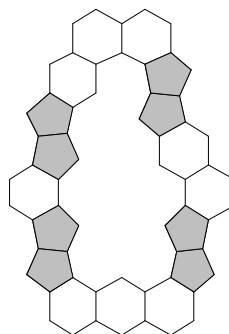

34

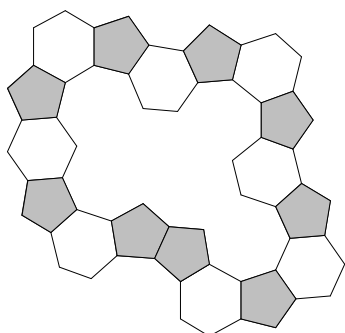

35

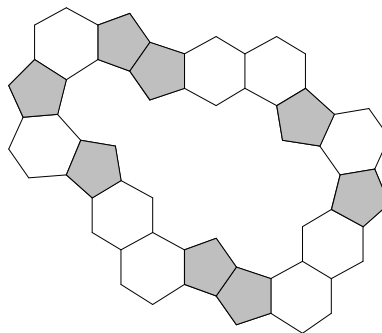

36

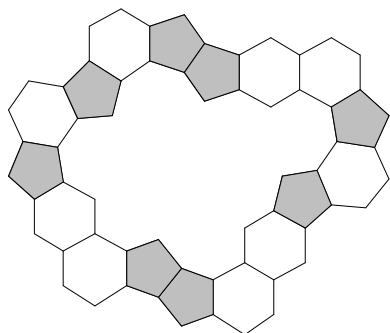

37

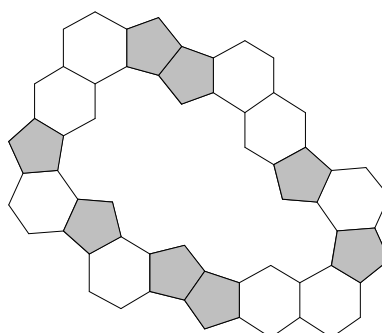

38

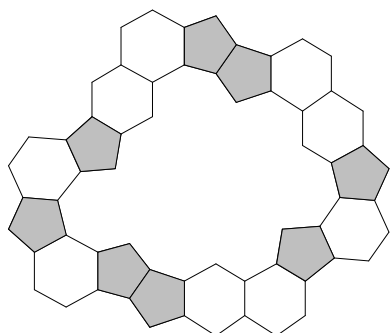

39

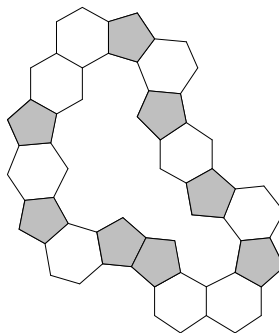

40

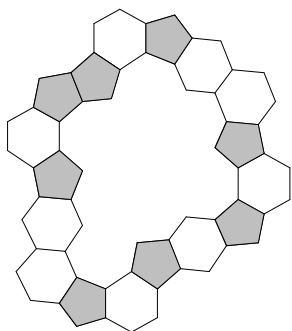

41

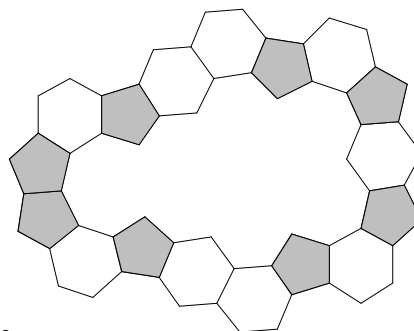

42

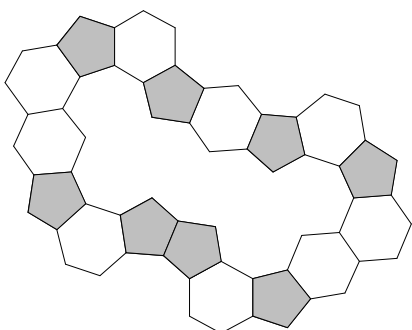

43

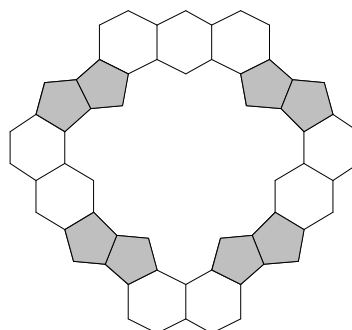

44

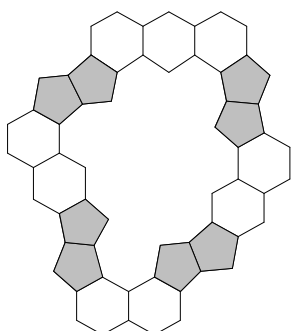

45

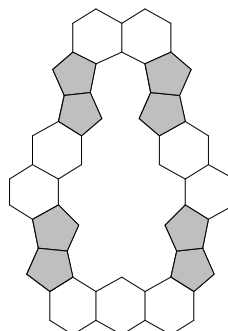

46

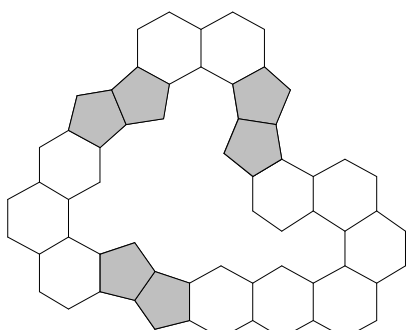

47

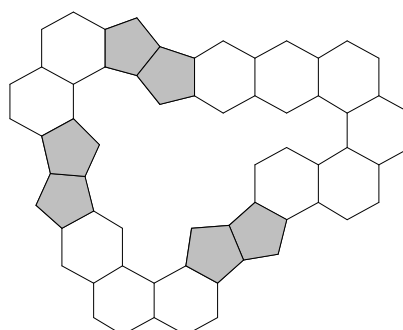

48

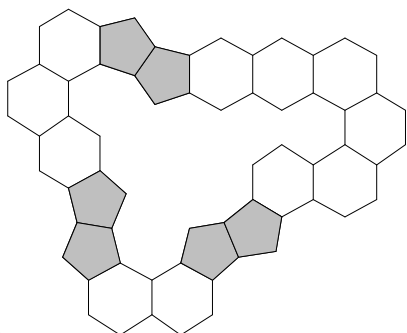

49

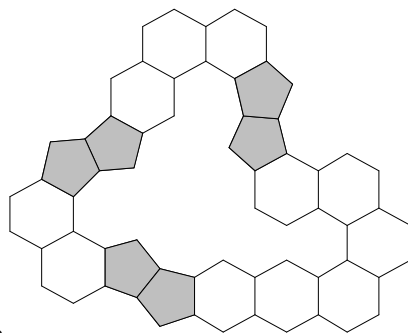

50

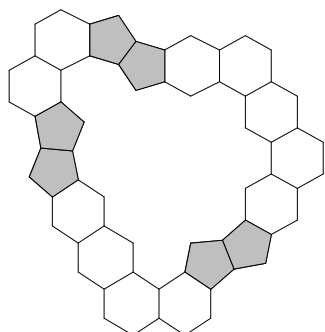

51

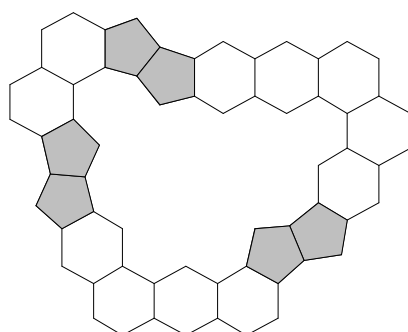

52

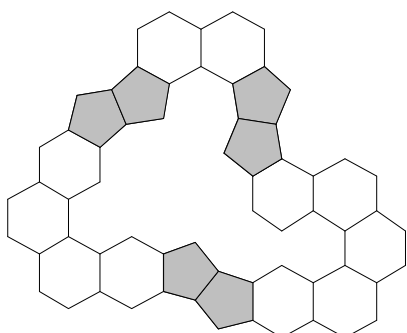

53

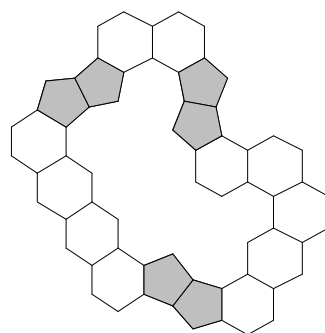

54

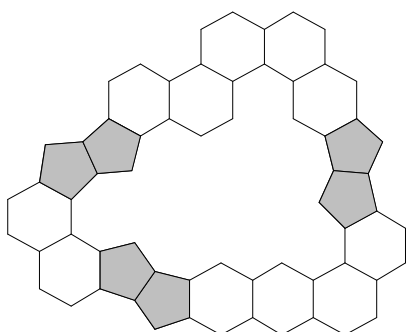

55

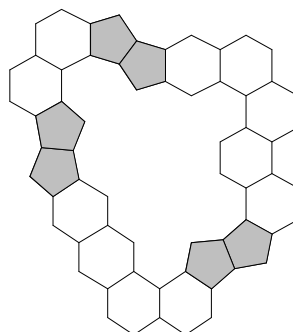

56

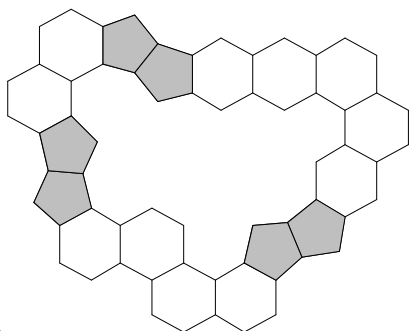

57

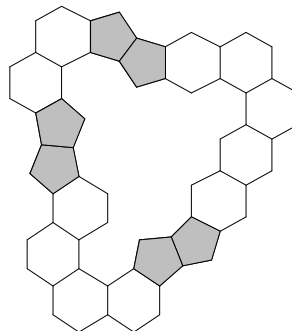

58

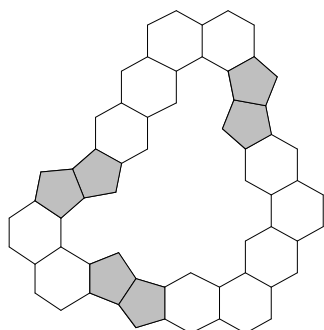

59

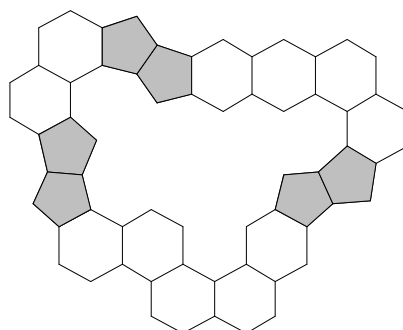

60

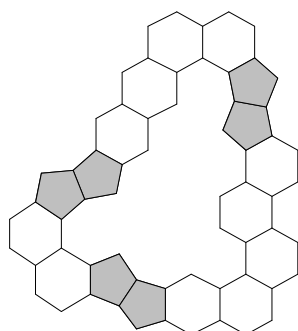

61

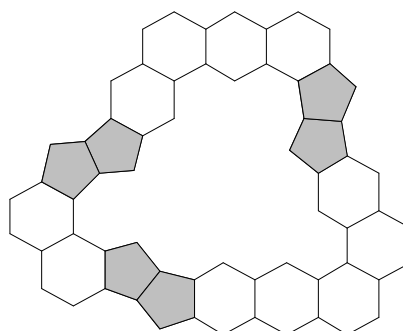

62

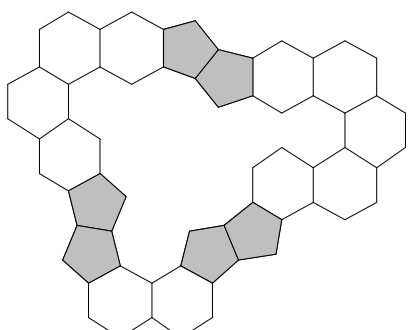

63

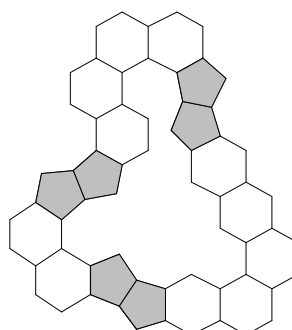

64



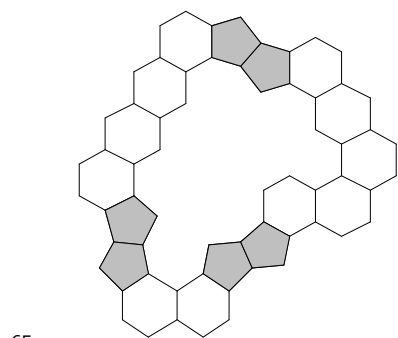

65

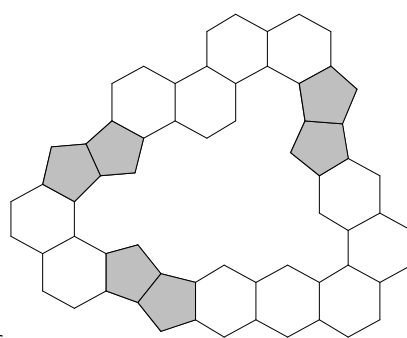

66

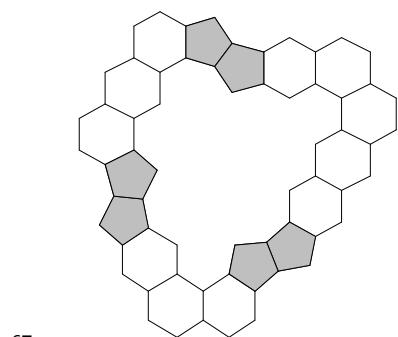

67

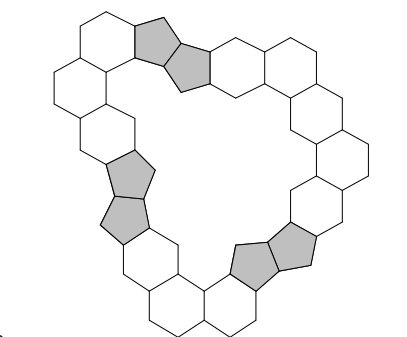

68

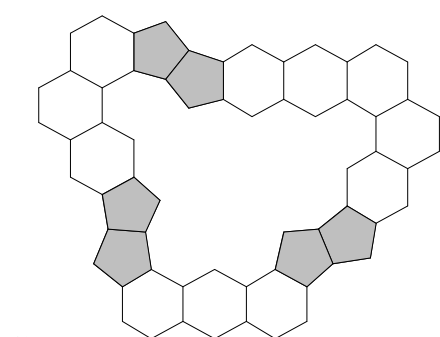

69

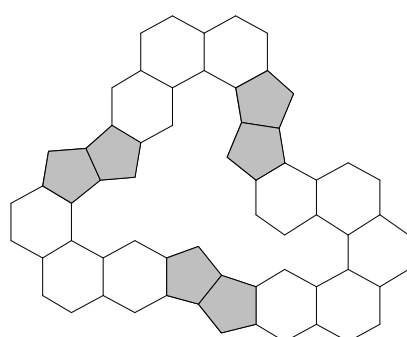

70

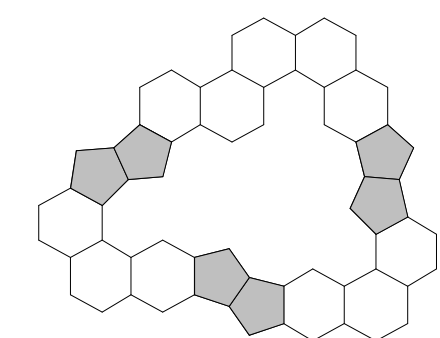

71

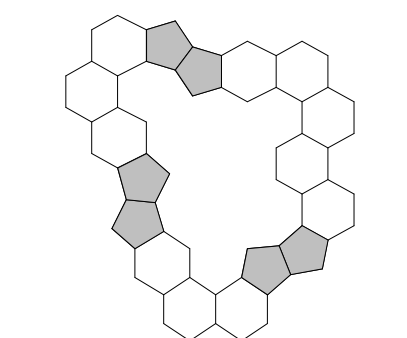

72

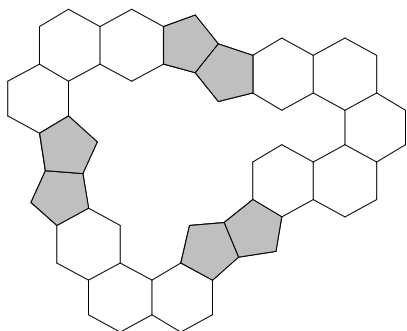

73

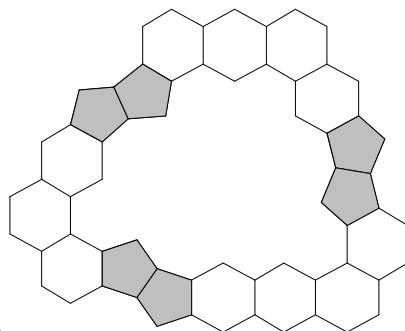

74

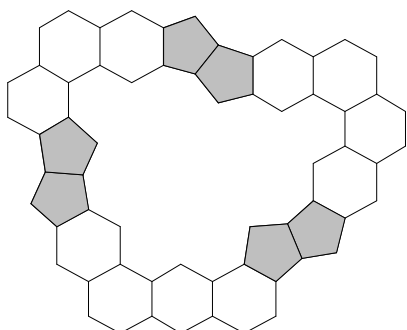

75

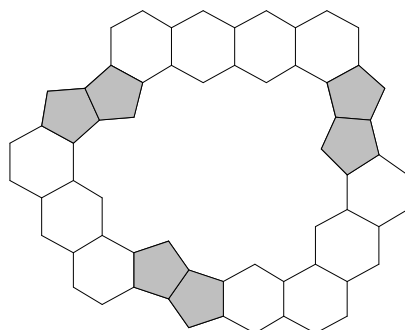

76

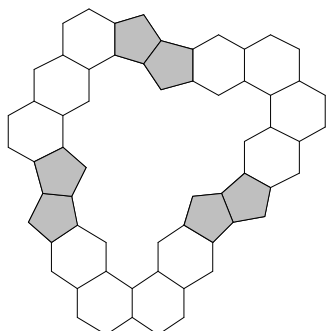

77

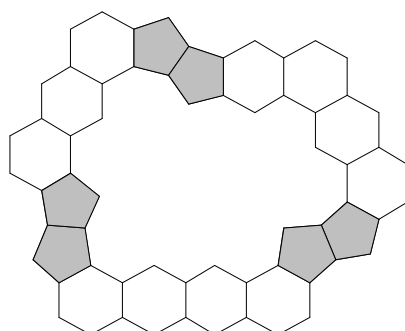

78

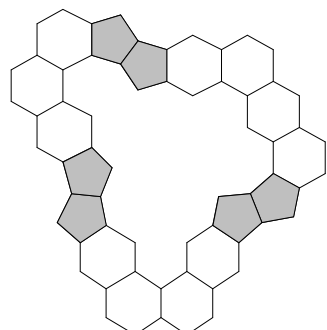

79

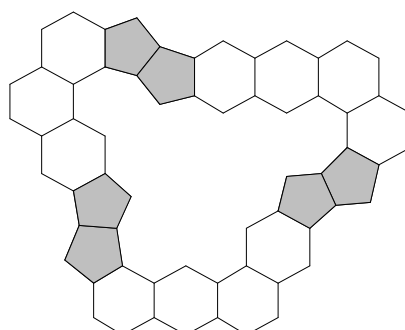

80

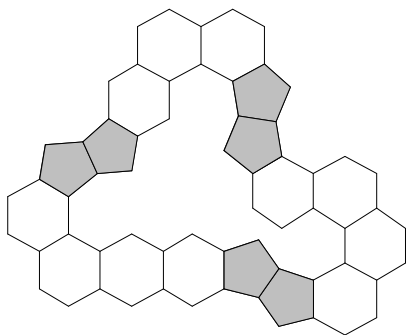

81

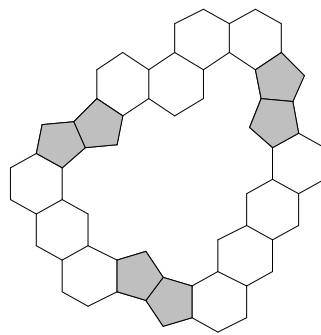

82

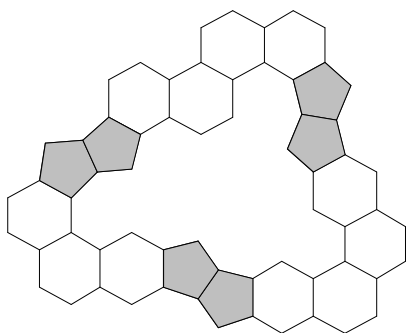

83

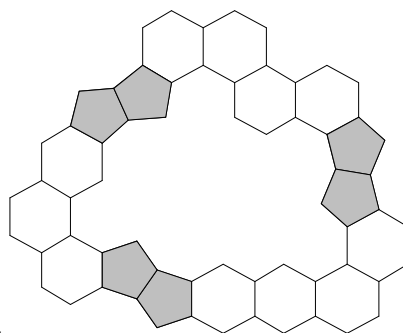

84

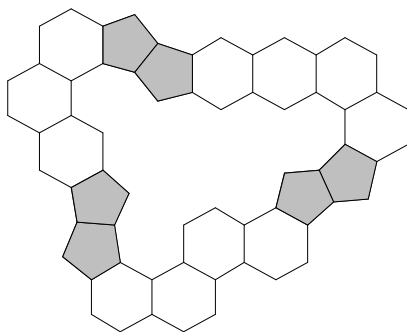

85

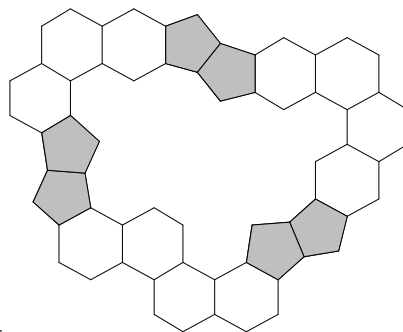

86

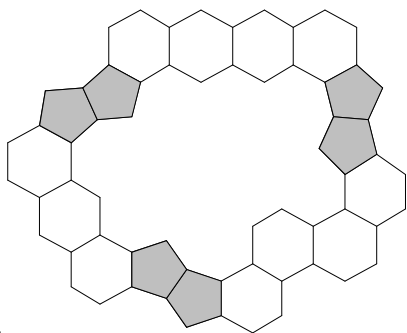

87

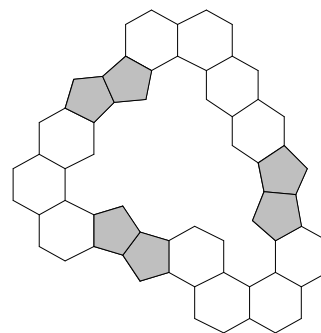

88

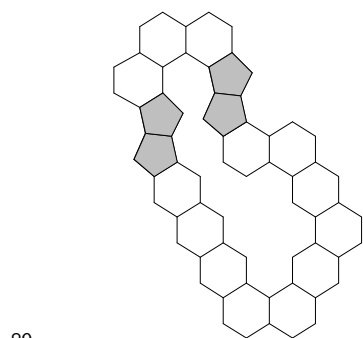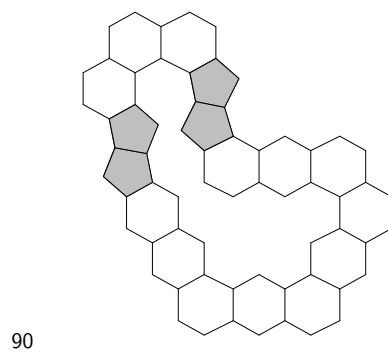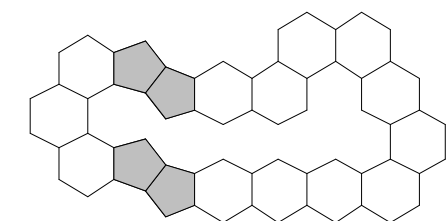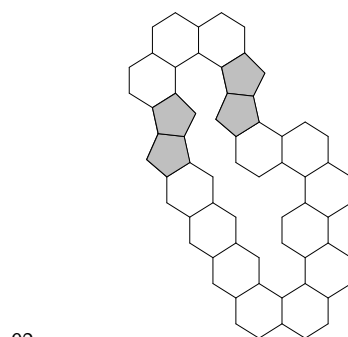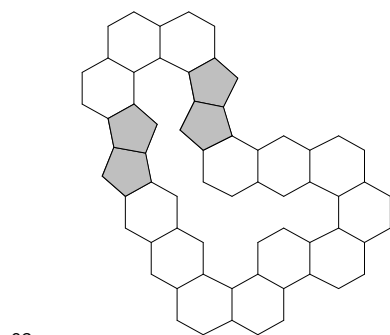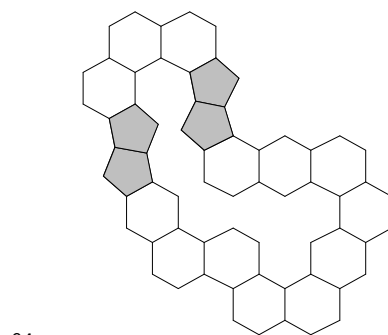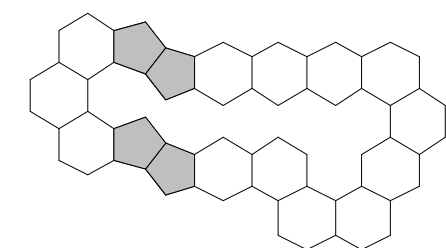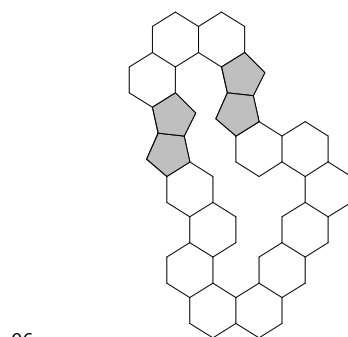

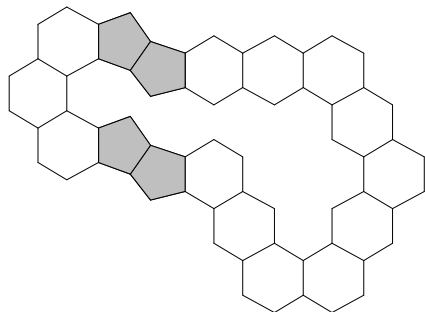

97

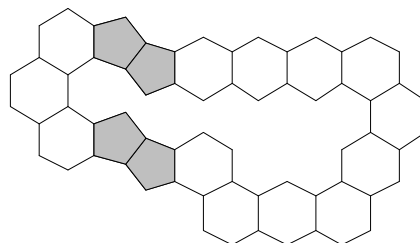

98

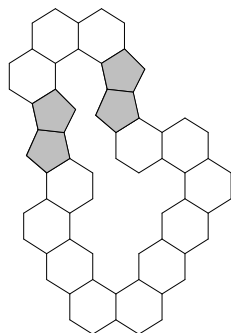

99

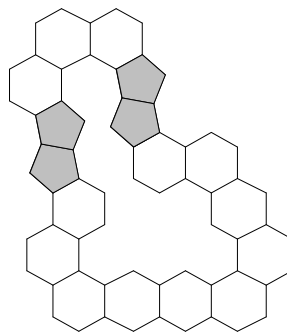

100

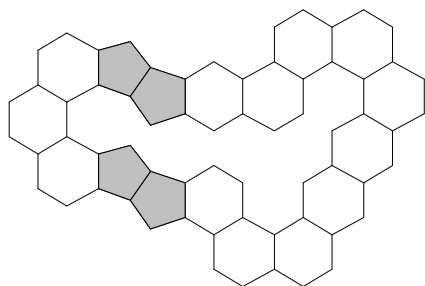

101

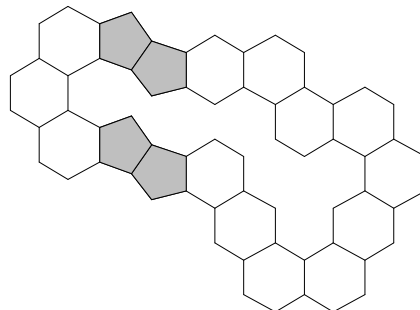

102

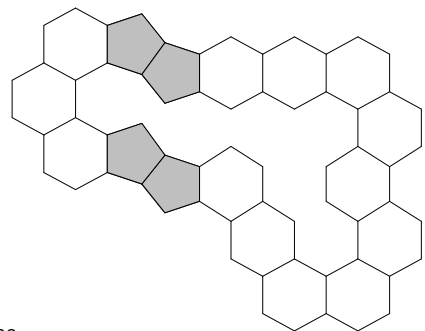

103

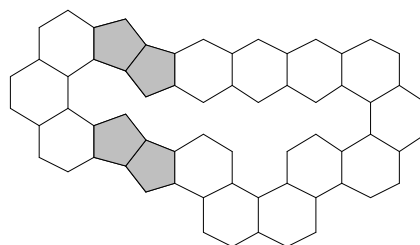

104

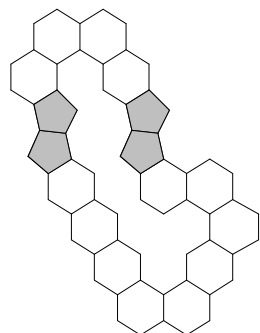

105

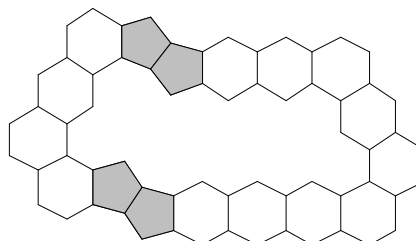

106

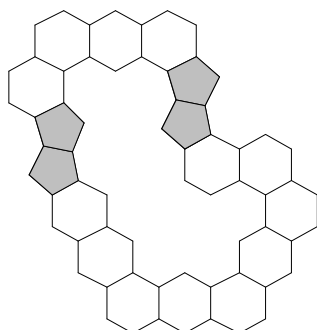

107

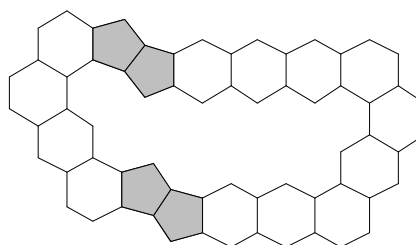

108

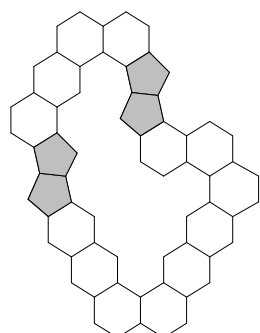

109

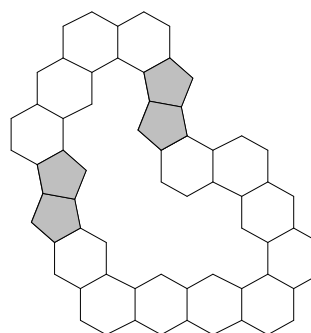

110

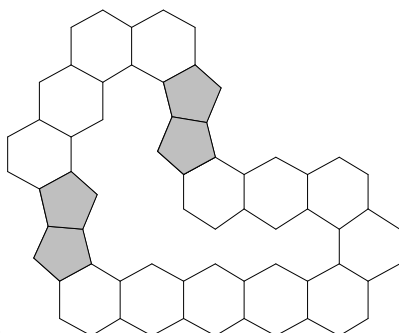

111

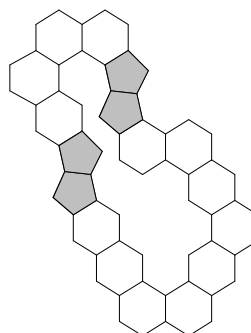

112

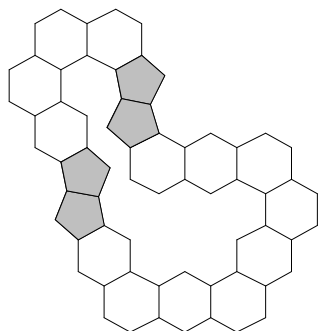

113

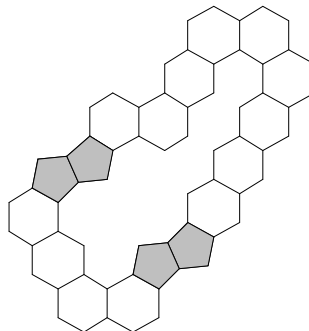

114

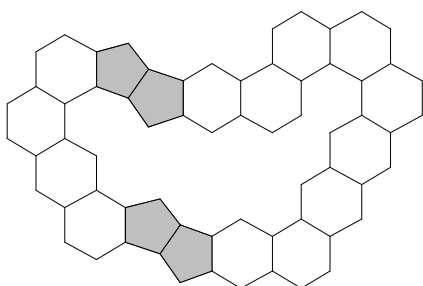

115

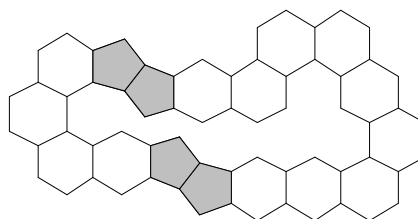

116

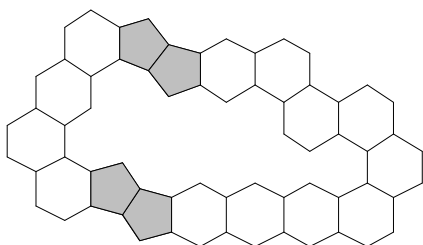

117

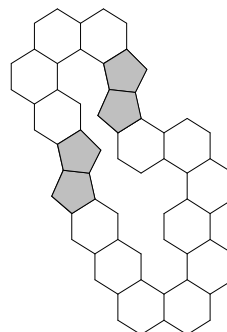

118

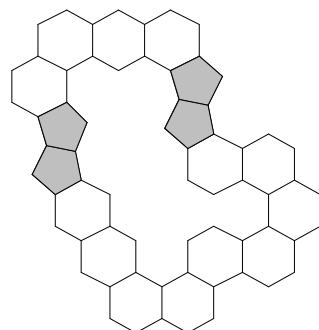

119

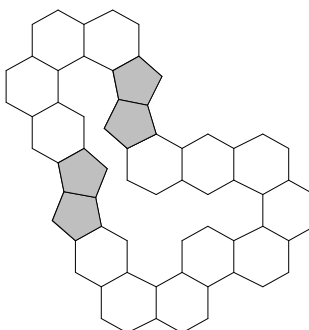

120

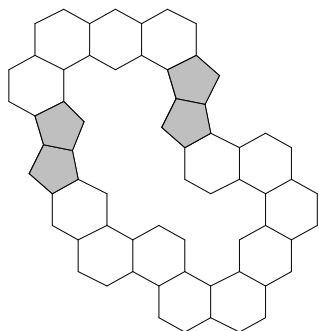

121

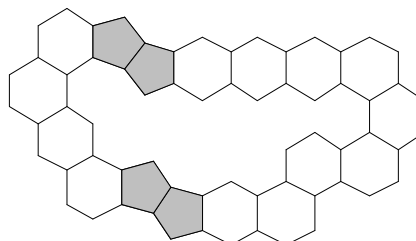

122

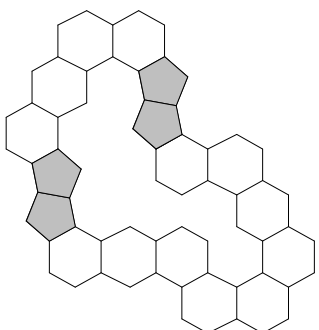

123

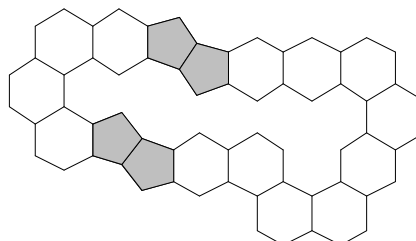

124

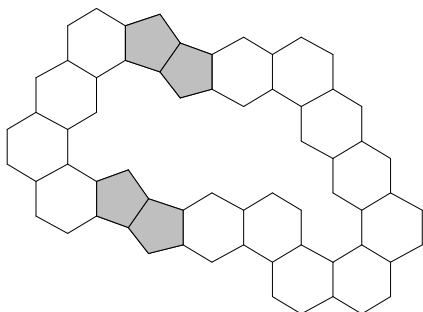

125

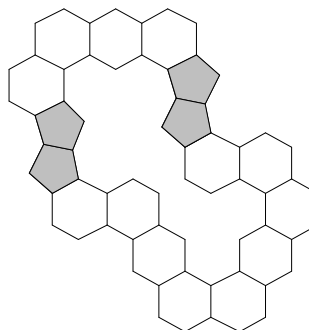

126

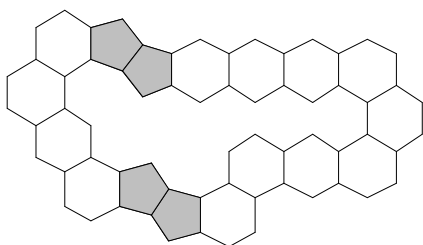

127

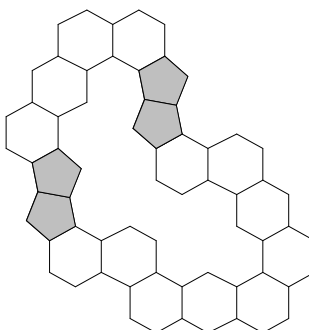

128



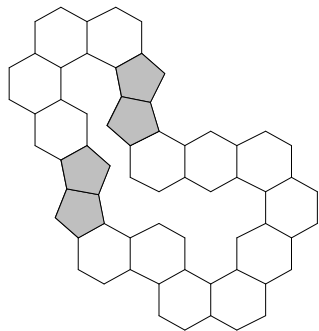

129

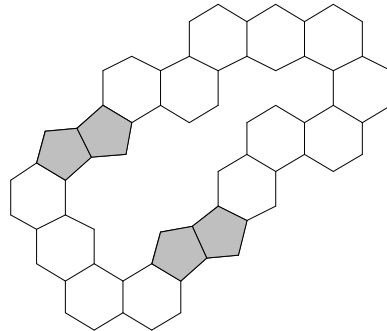

130

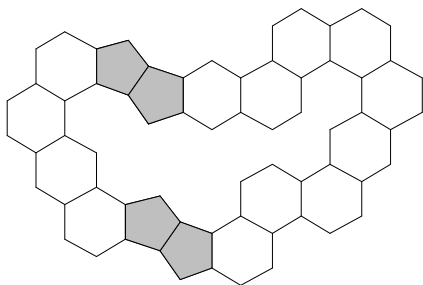

131

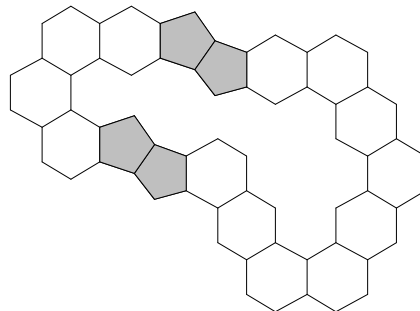

132

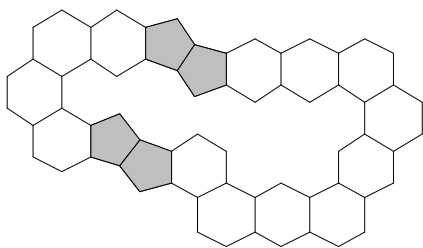

133

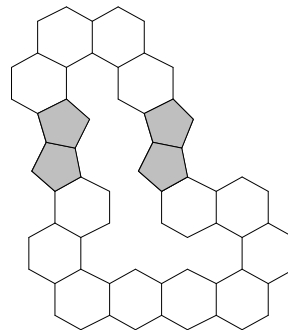

134

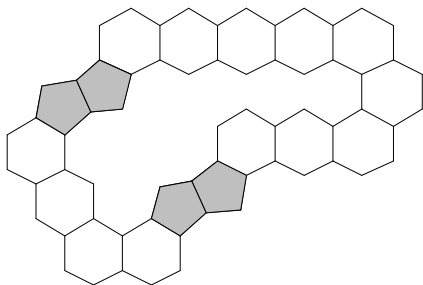

135

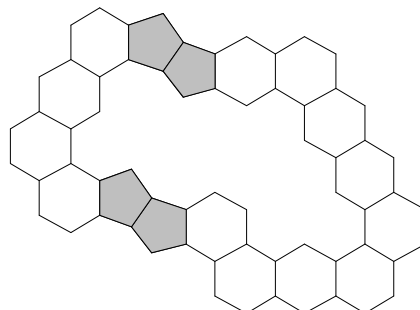

136

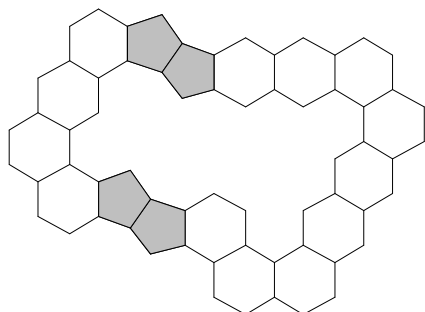

137

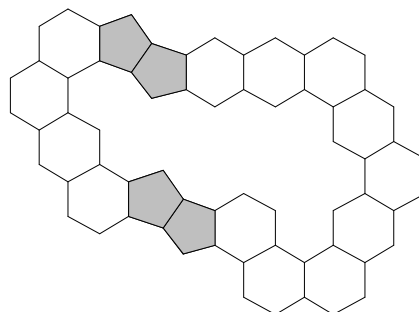

138

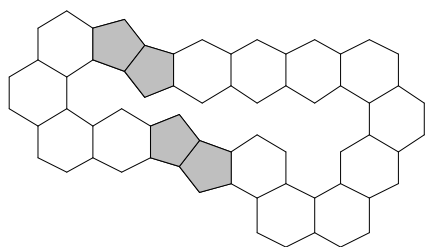

139

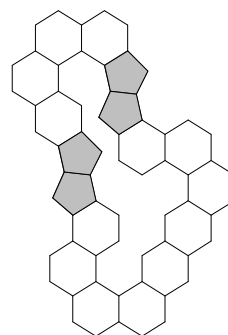

140

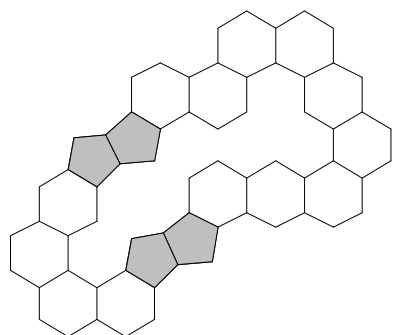

141

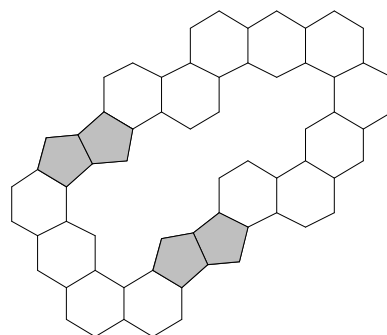

142

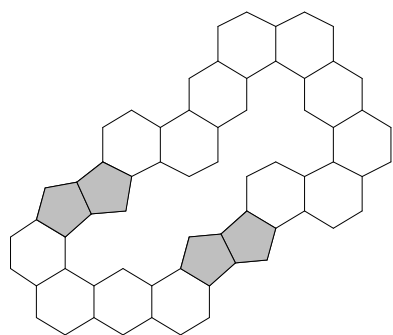

143

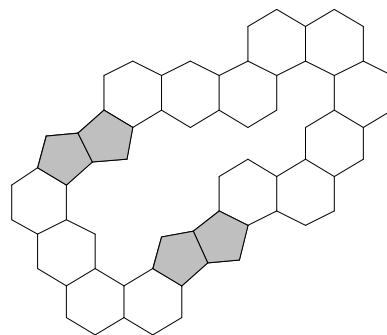

144

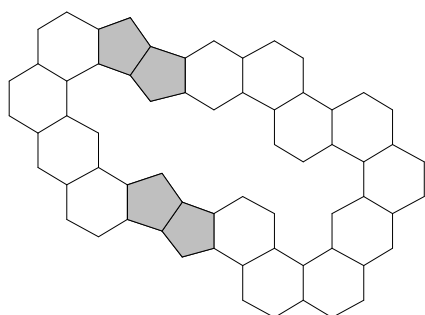

145

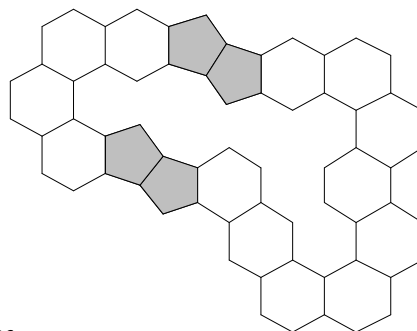

146

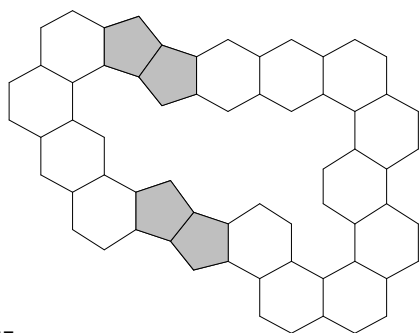

147

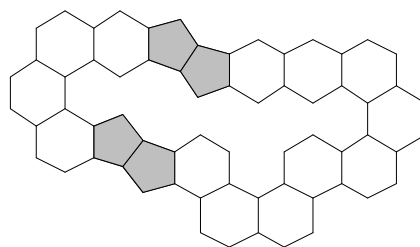

148

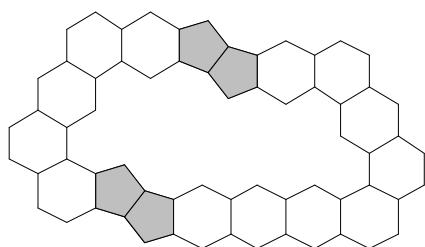

149

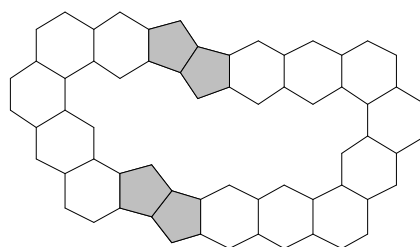

150

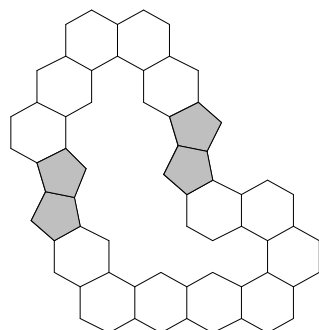

151

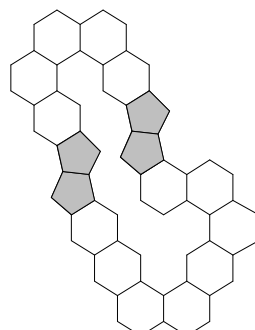

152

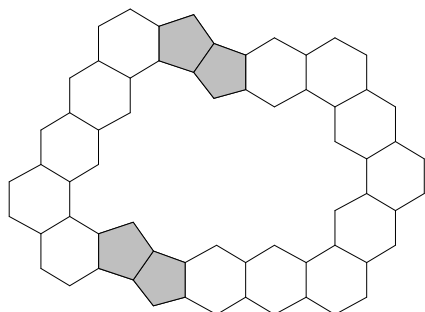

153

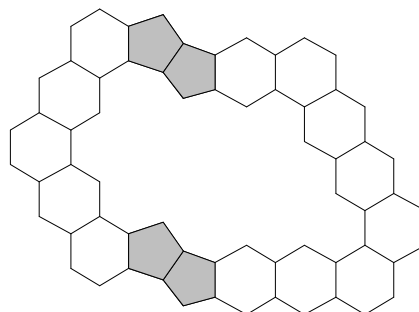

154

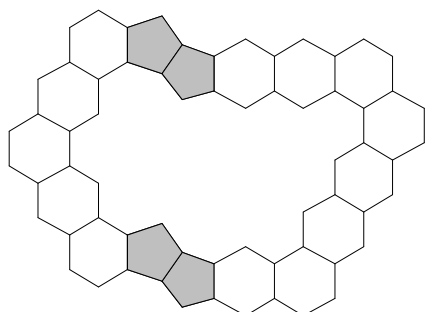

155

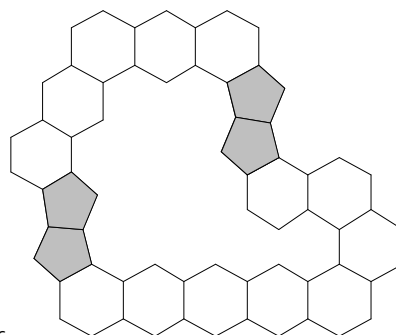

156

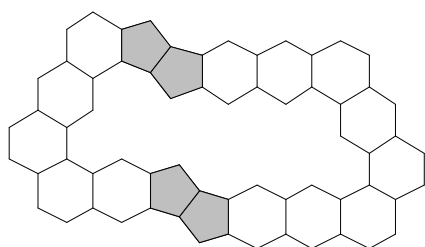

157

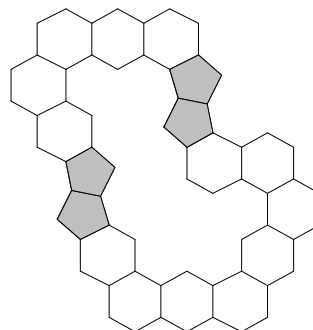

158

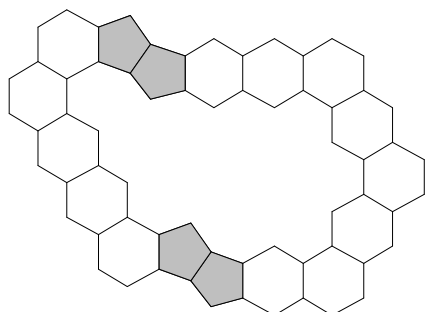

159

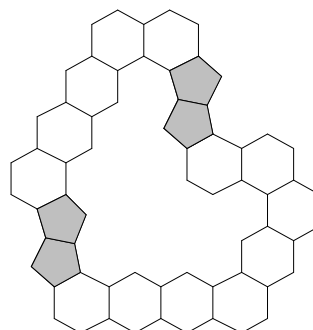

160

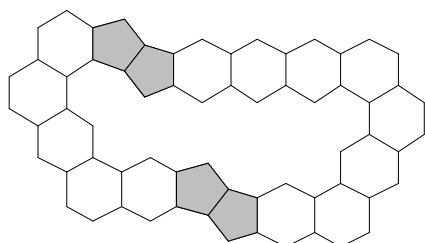

161

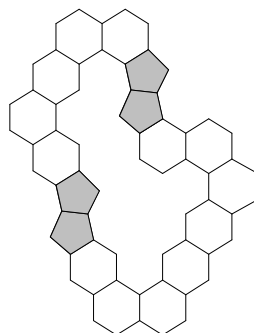

162

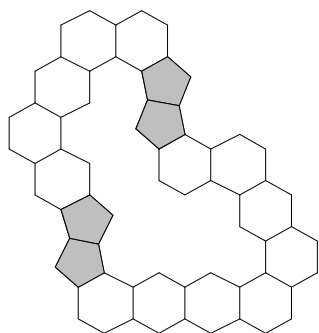

163

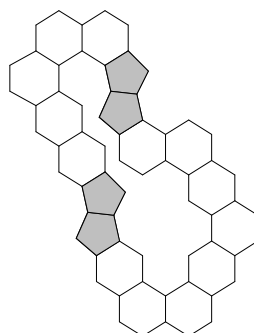

164

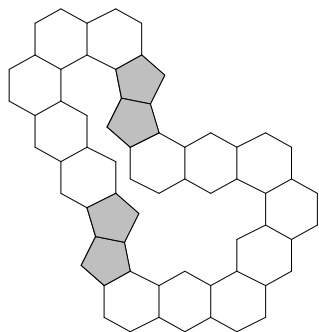

165

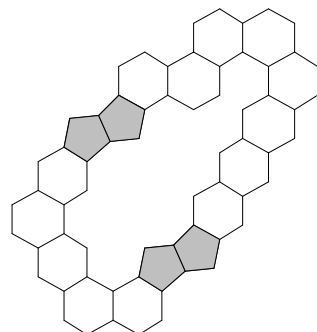

166

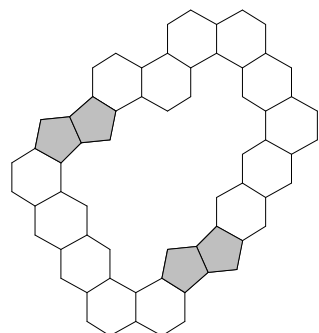

167

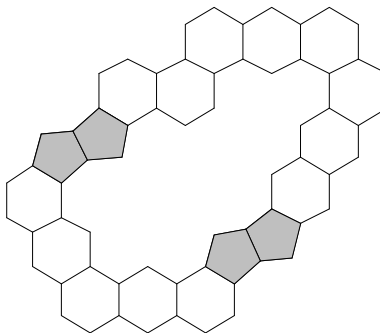

168

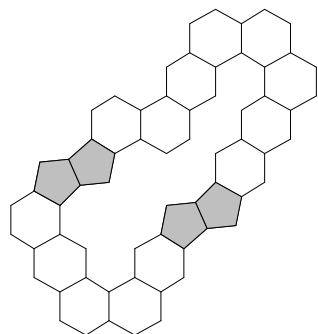

169

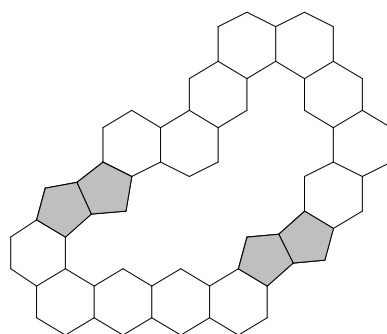

170

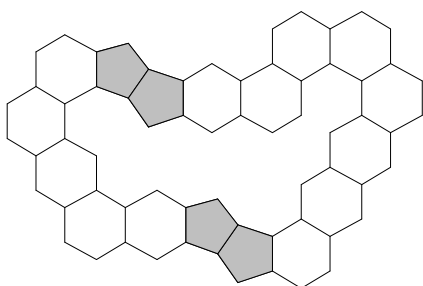

171

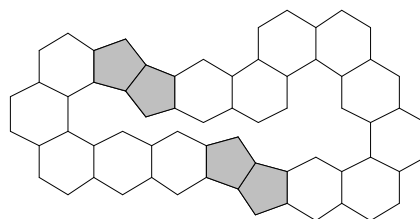

172

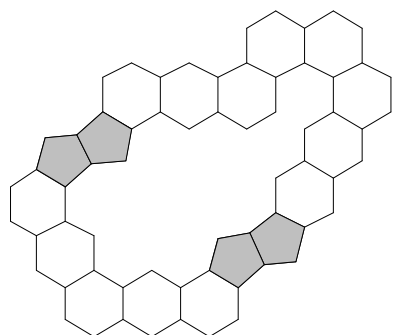

173

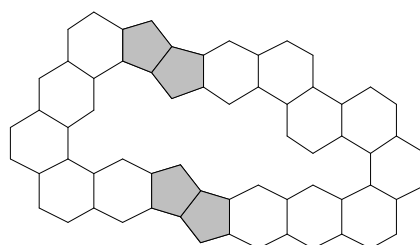

174

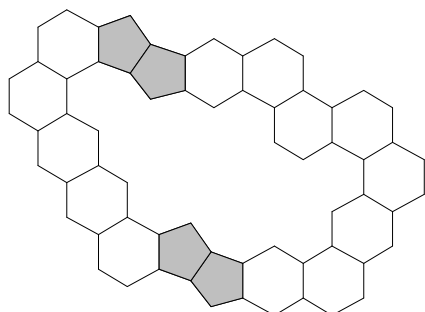

175

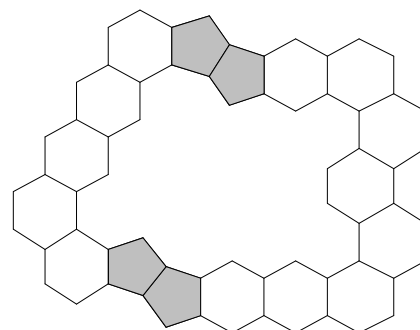

176

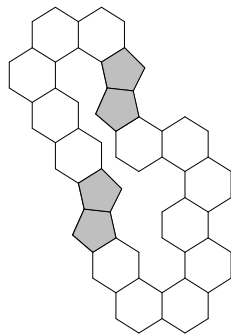

177

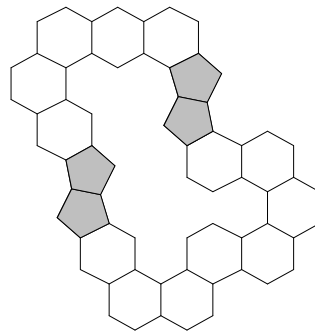

178

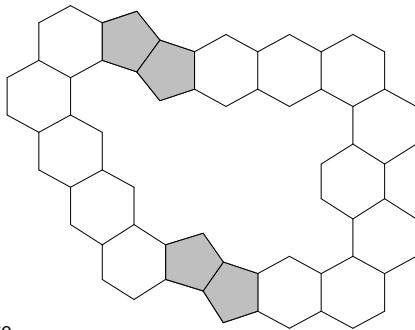

179

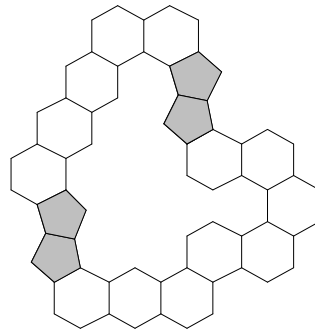

180

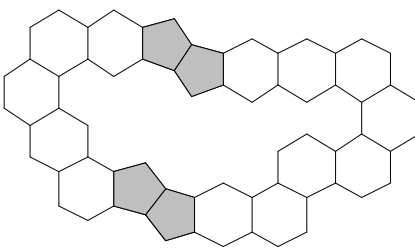

181

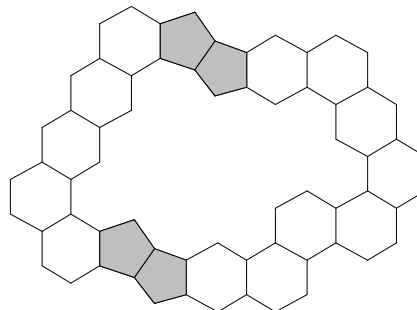

182

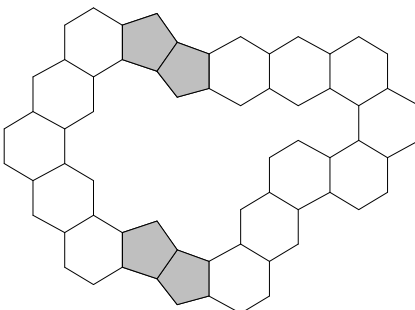

183

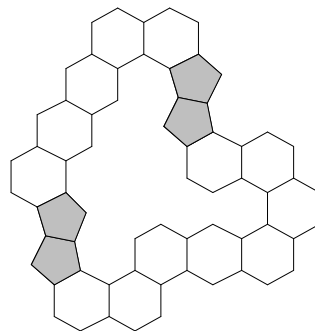

184

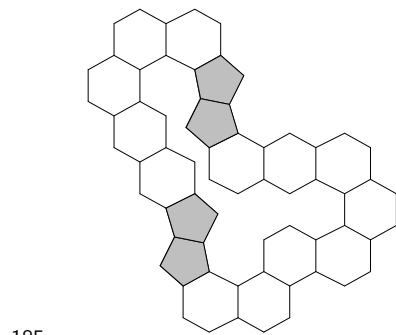

185

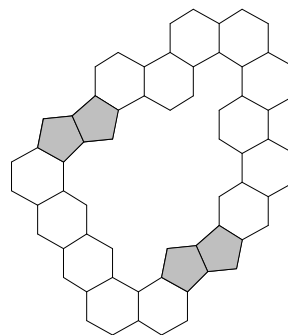

186

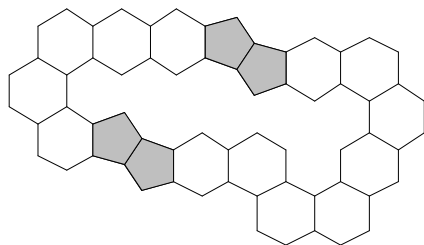

187

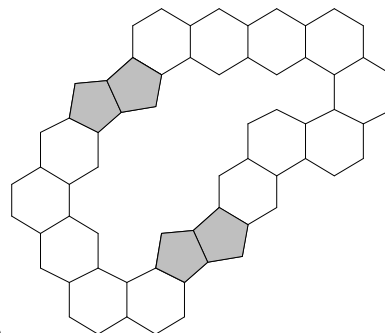

188

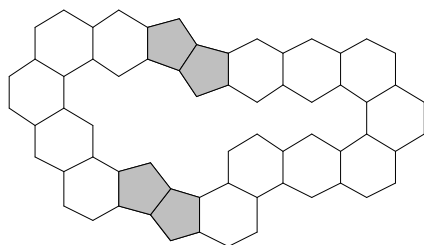

189

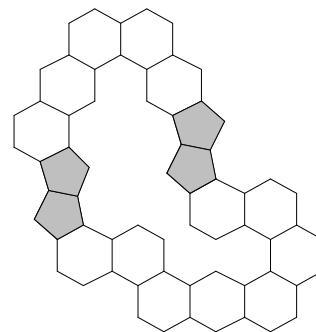

190

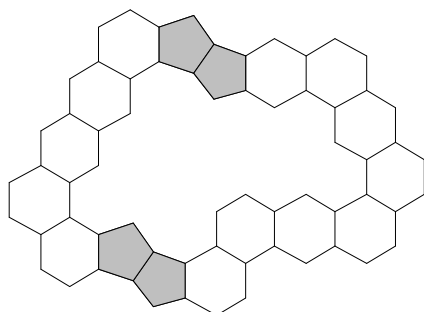

191

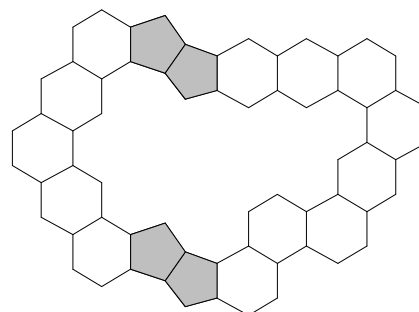

192



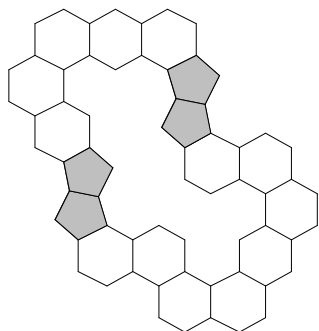

193

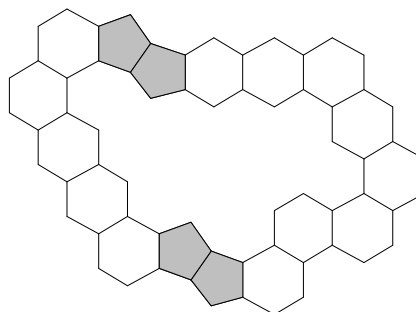

194

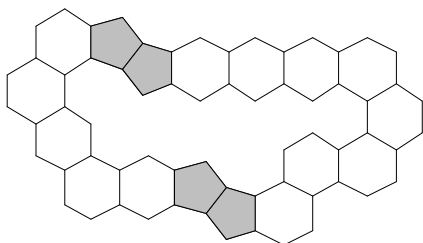

195

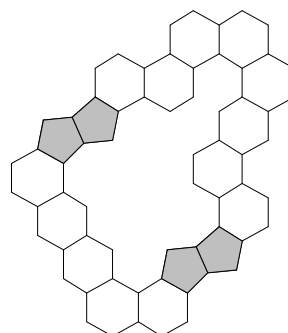

196

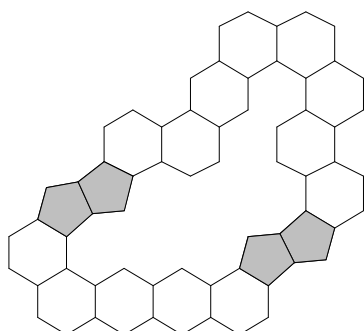

197

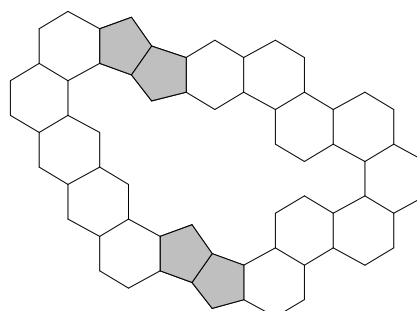

198

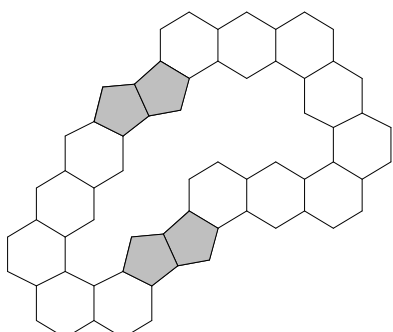

199

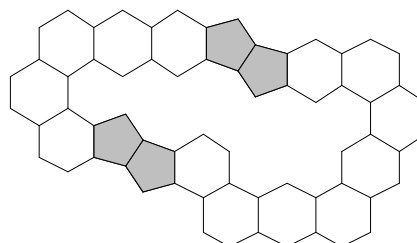

200

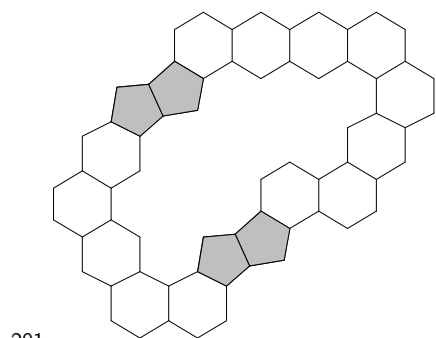

201

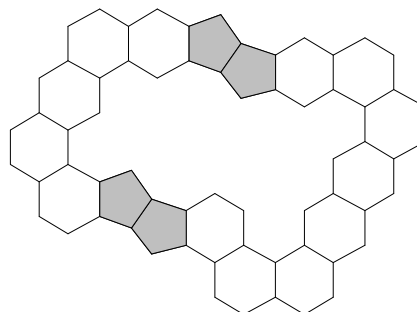

202

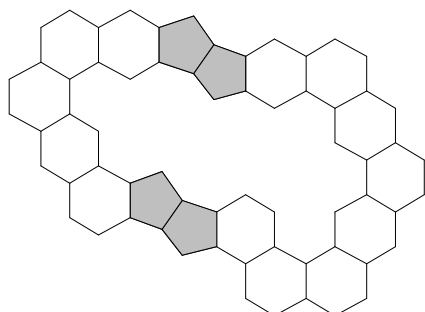

203

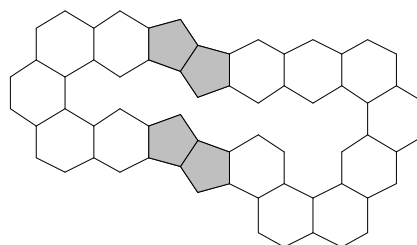

204

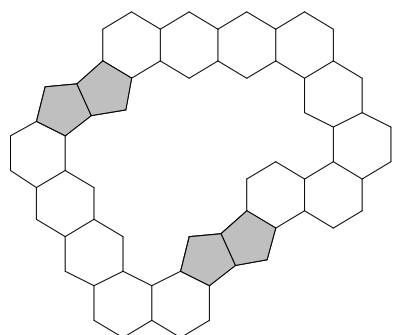

205

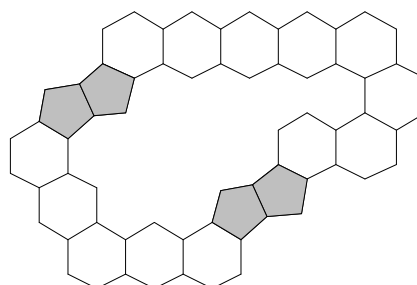

206

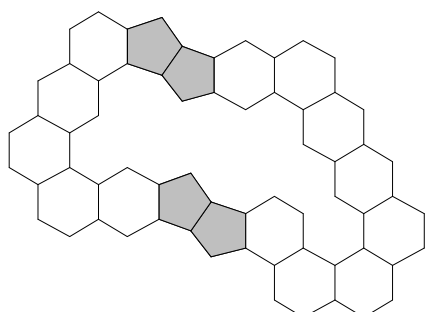

207

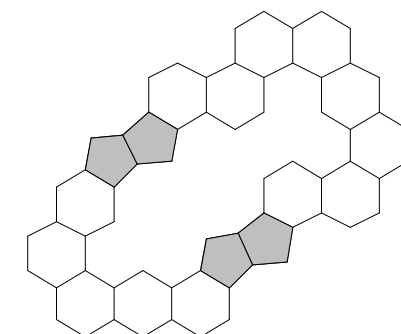

208

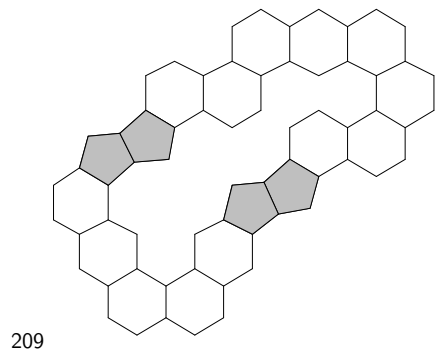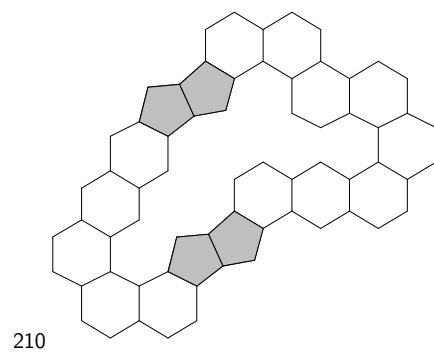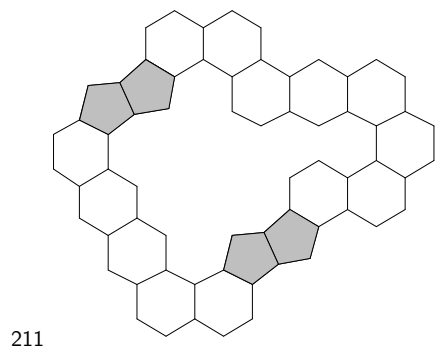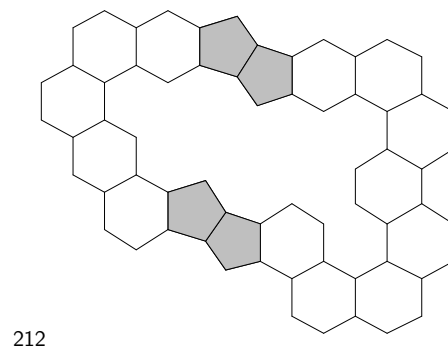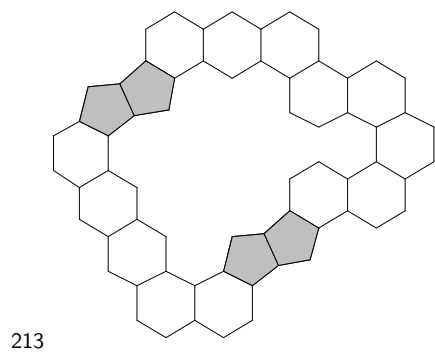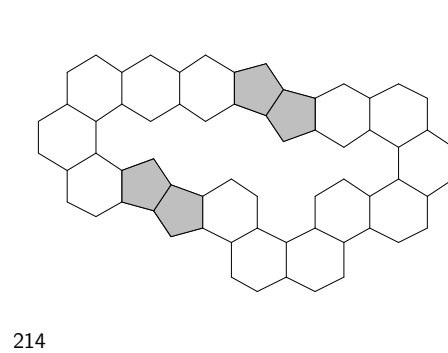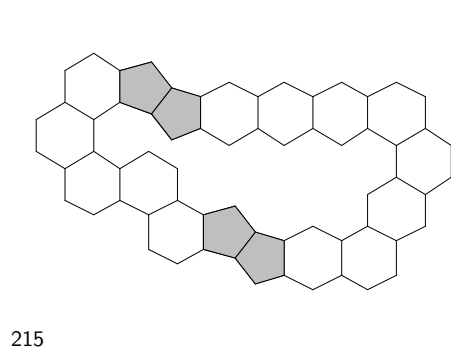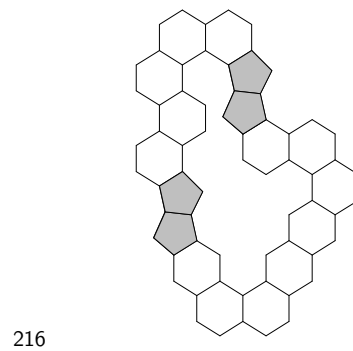

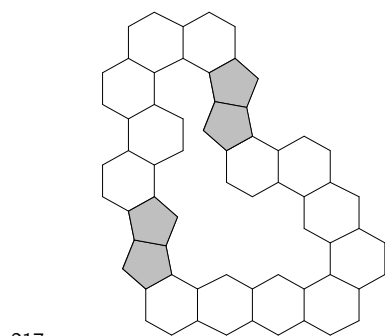

217

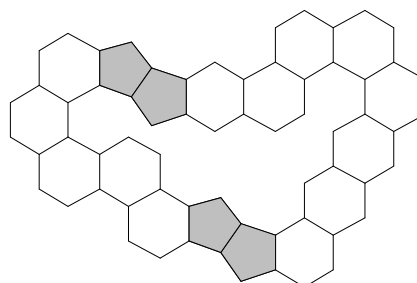

218

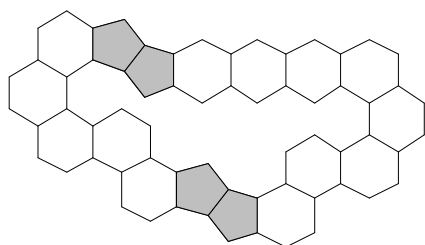

219

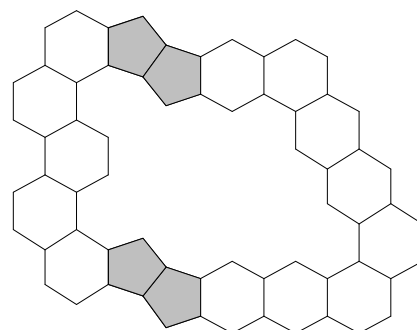

220

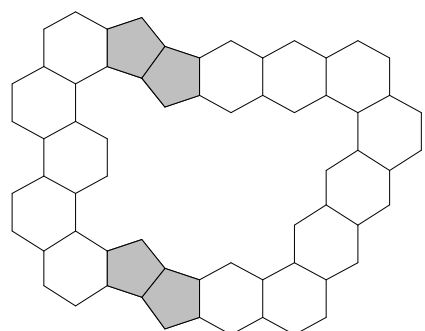

221

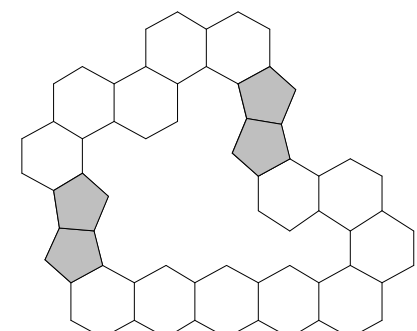

222

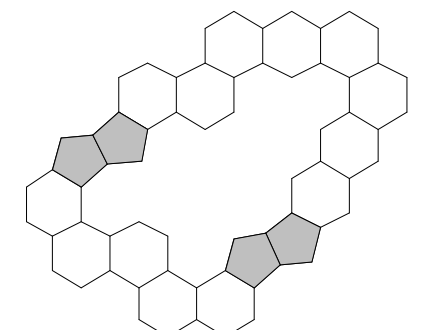

223

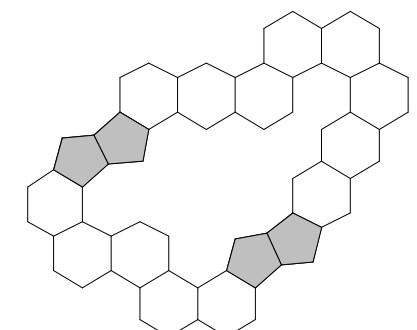

224

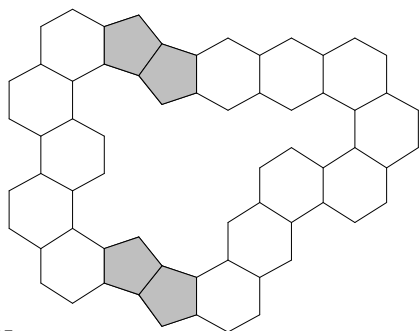

225

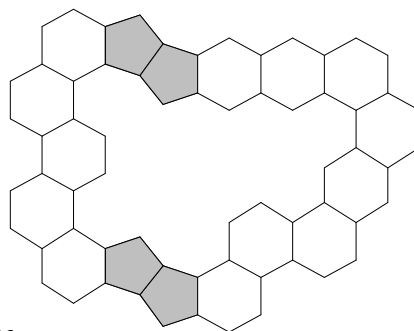

226

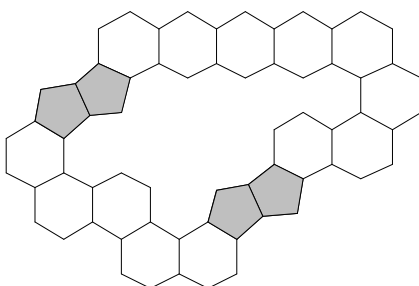

227

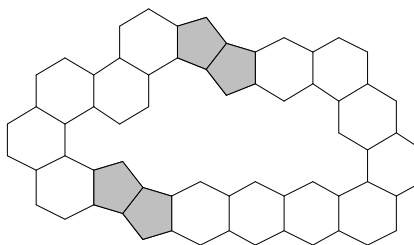

228

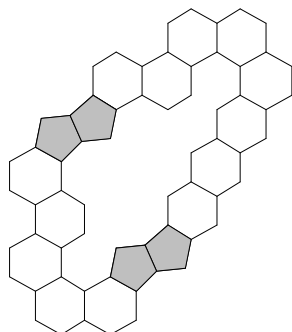

229

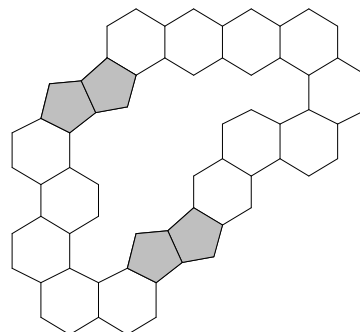

230

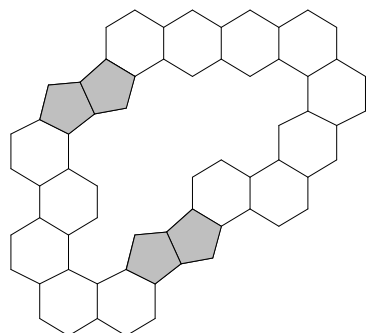

231

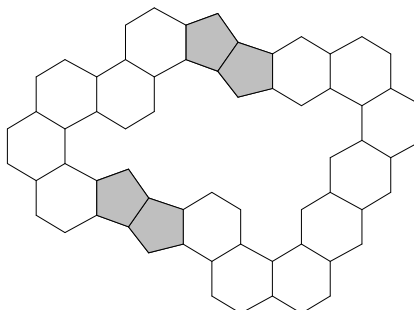

232

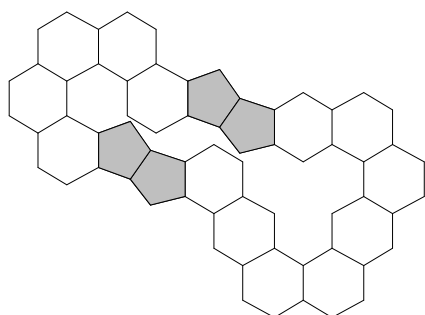

233

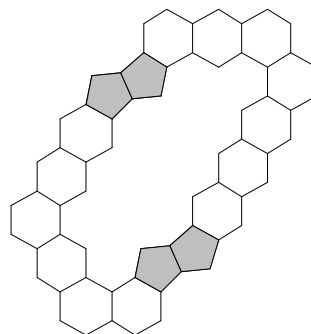

234

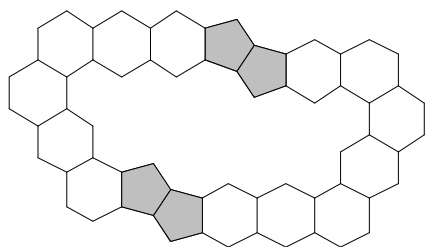

235

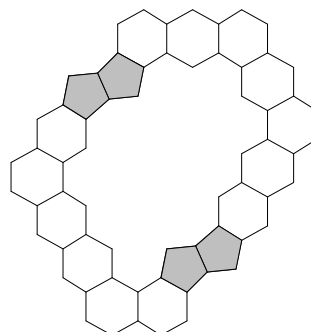

236

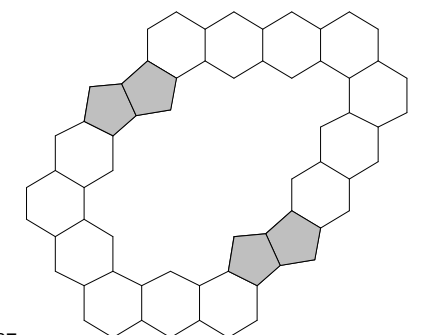

237

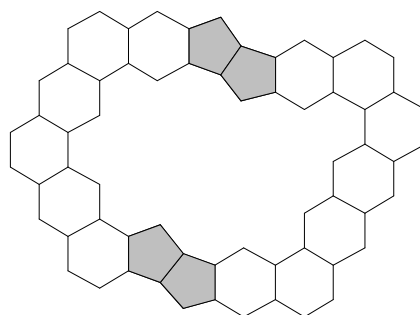

238

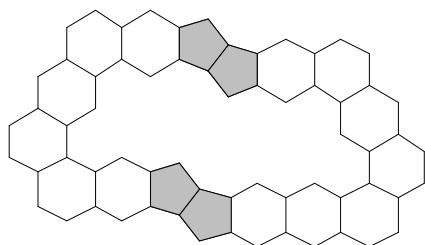

239

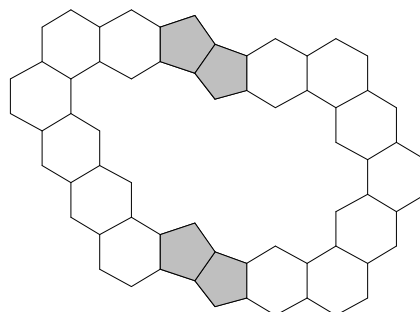

240

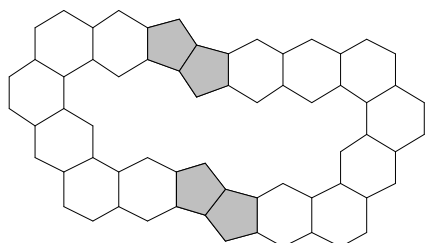

241

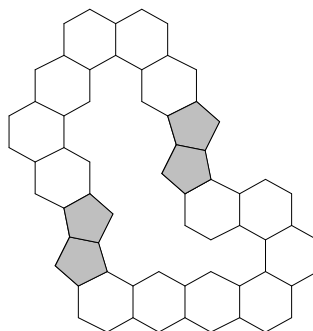

242

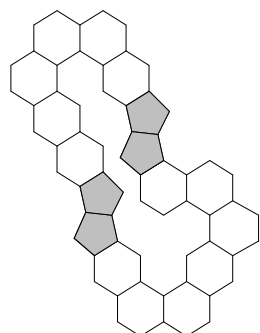

243

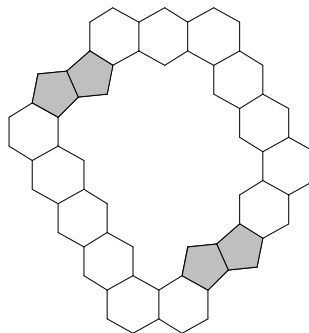

244

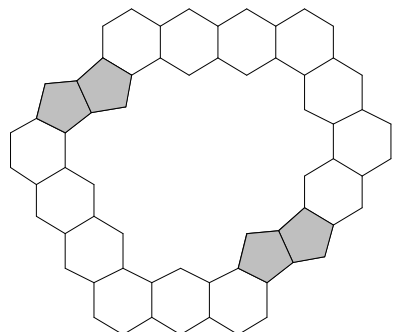

245

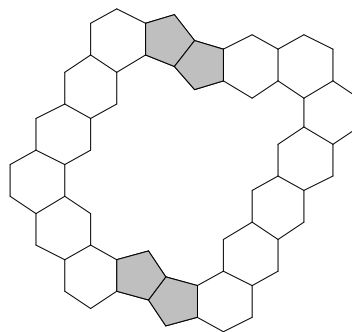

246

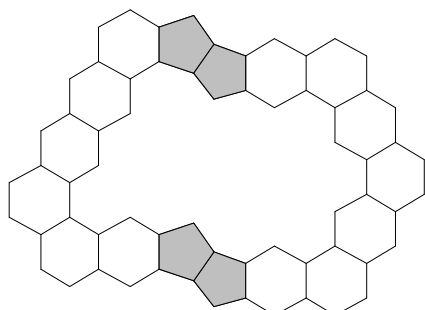

247

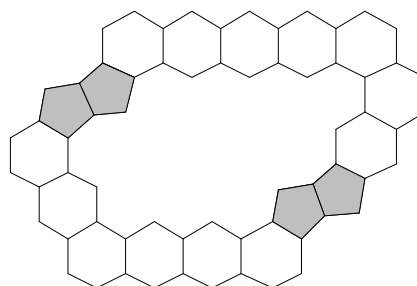

248

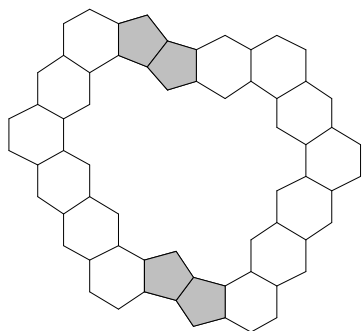

249

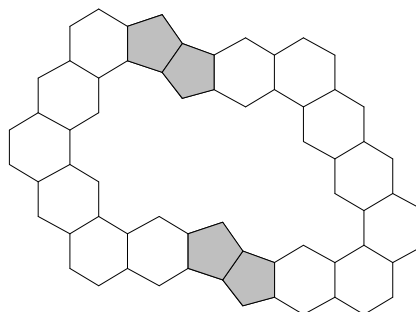

250

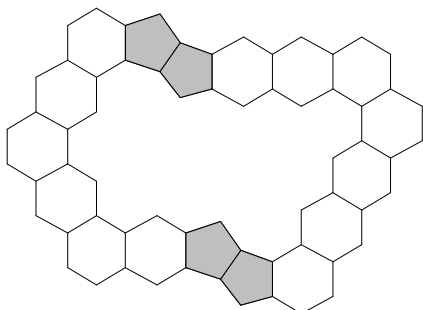

251

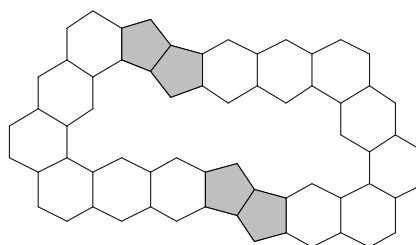

252

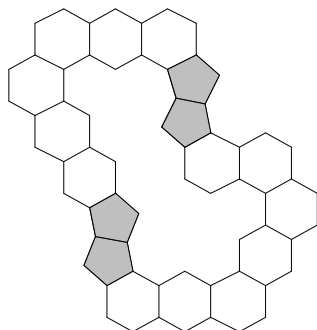

253

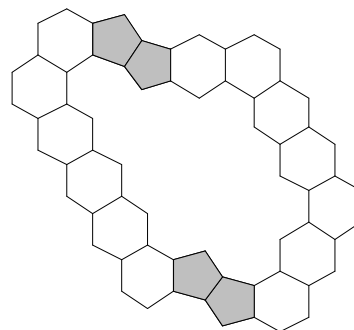

254

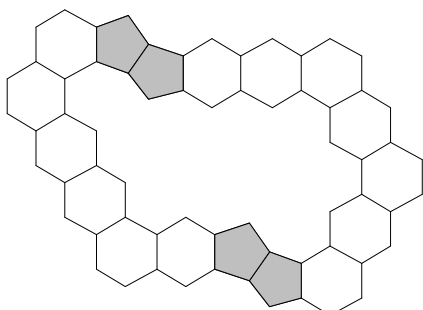

255

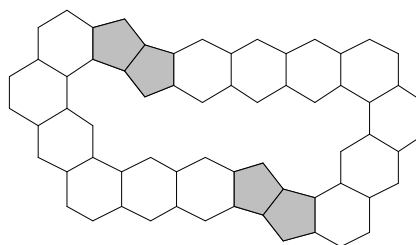

256



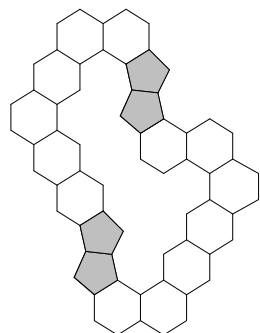

257

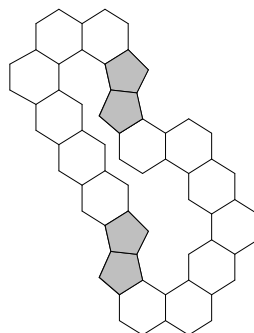

258

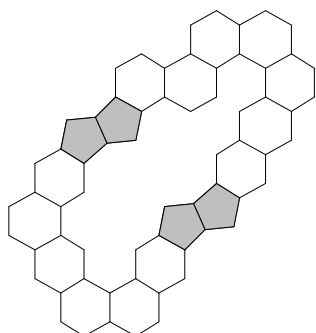

259

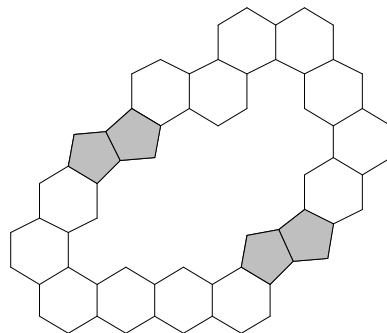

260

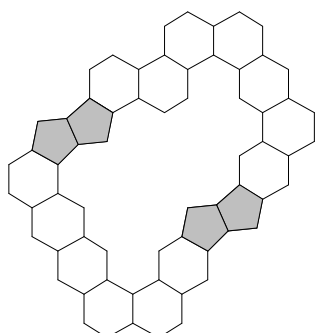

261

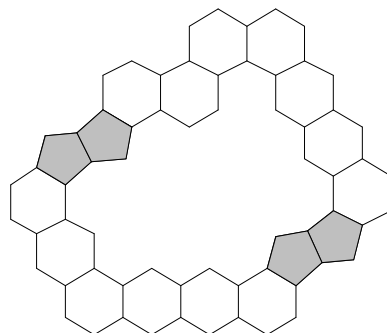

262

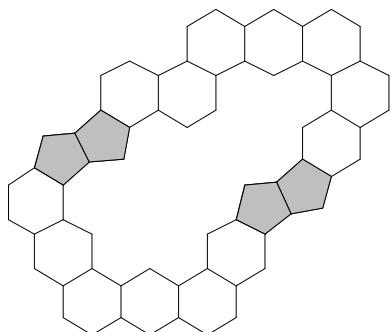

263

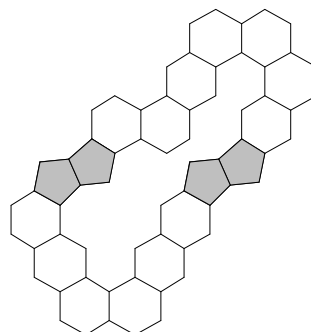

264

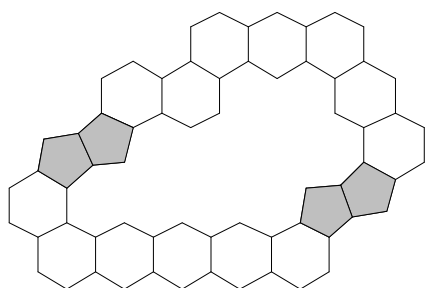

265

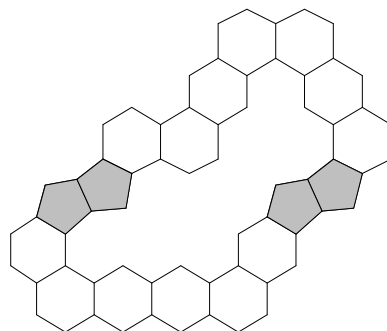

266

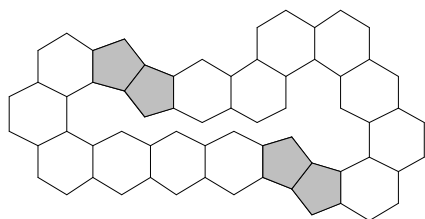

267

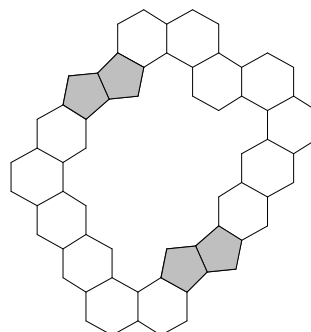

268

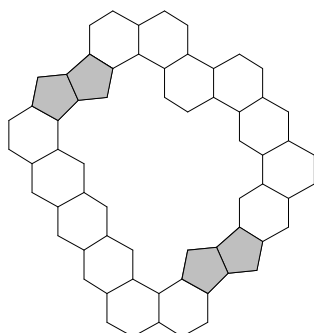

269

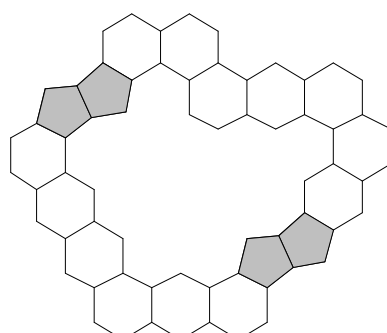

270

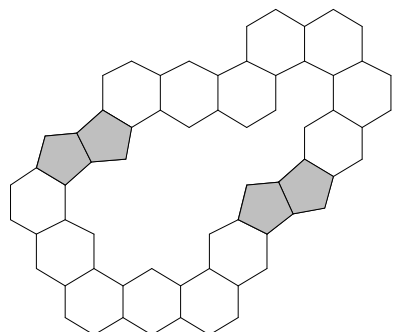

271

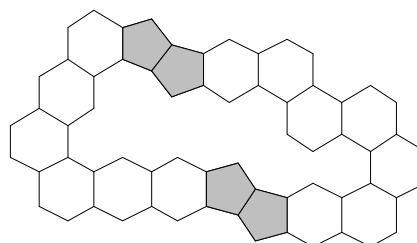

272

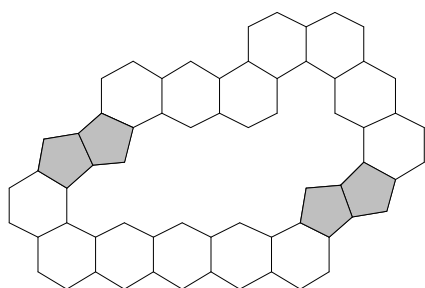

273

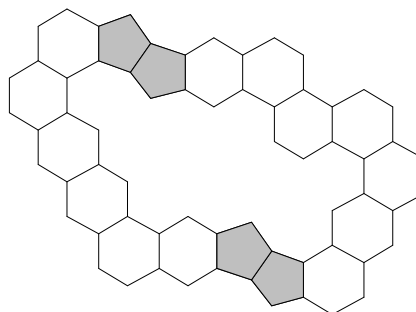

274

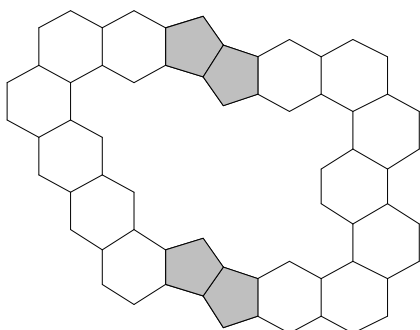

275

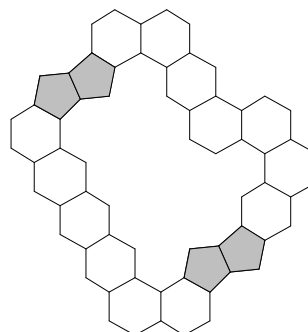

276

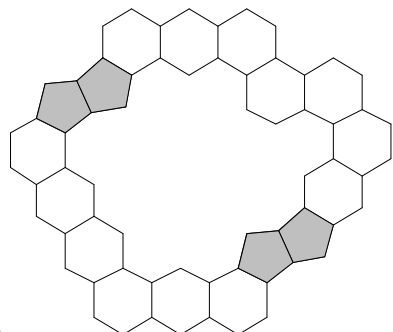

277

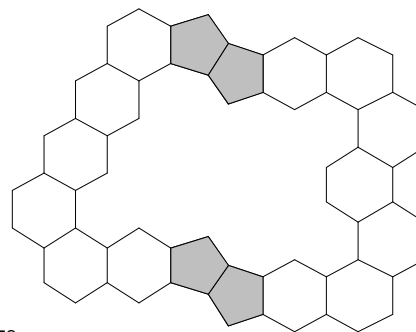

278

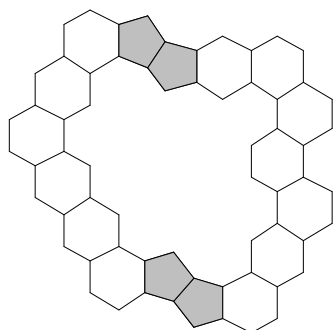

279

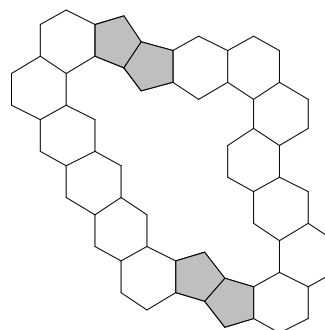

280

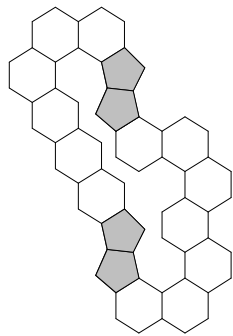

281

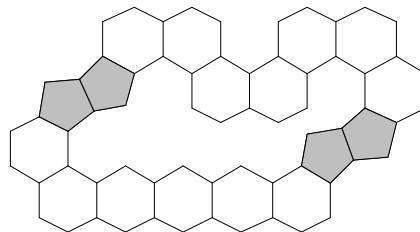

282

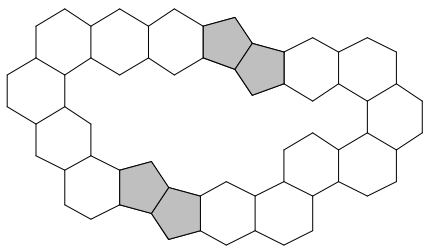

283

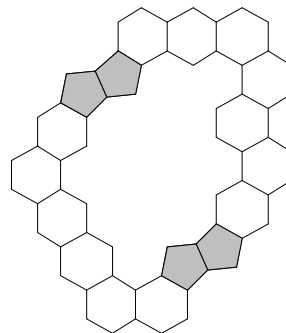

284

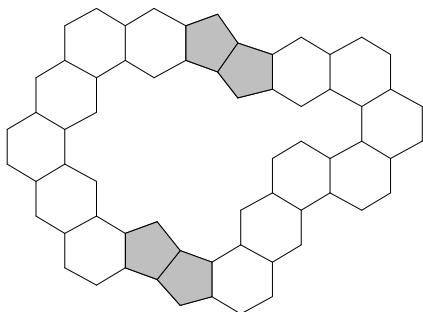

285

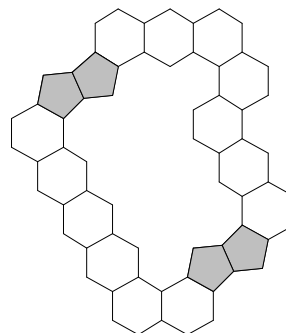

286

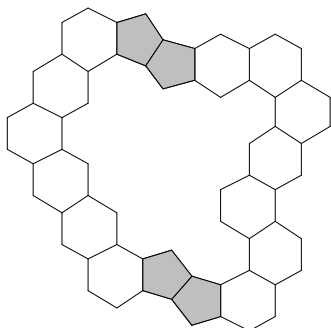

287

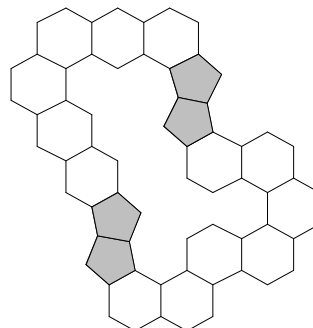

288

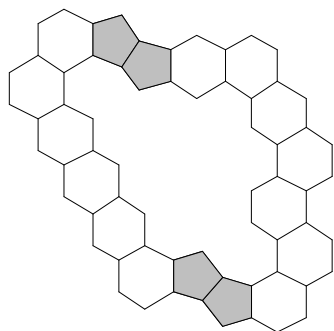

289

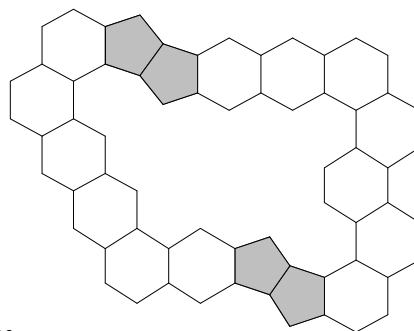

290

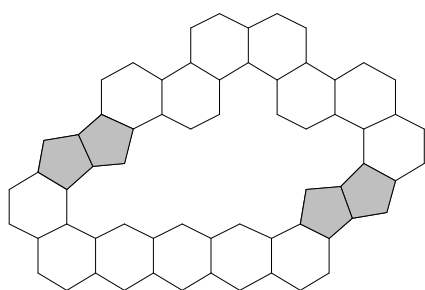

291

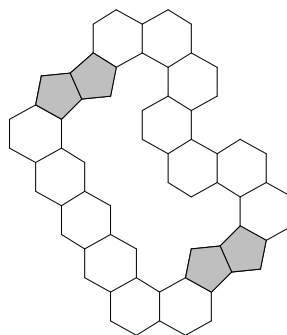

292

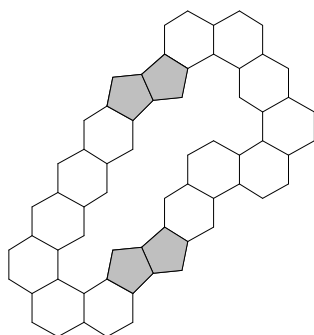

293

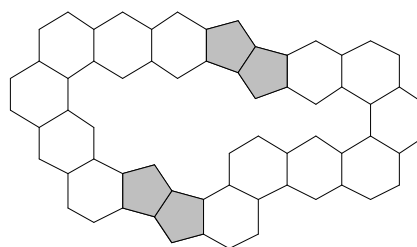

294

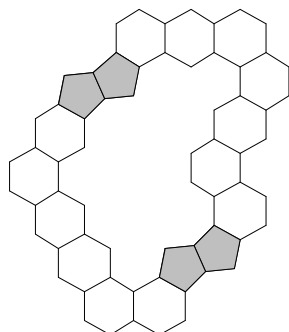

295

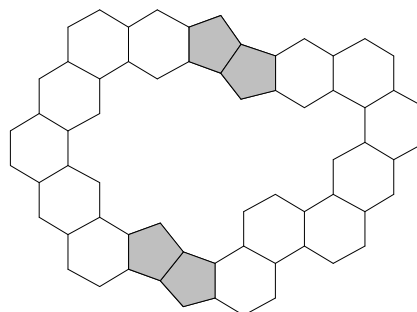

296

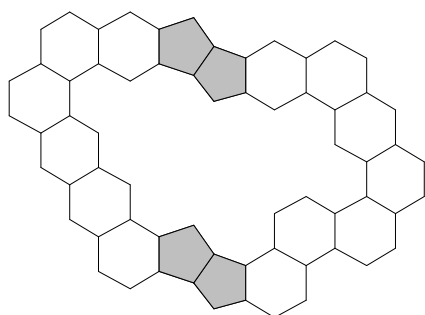

297

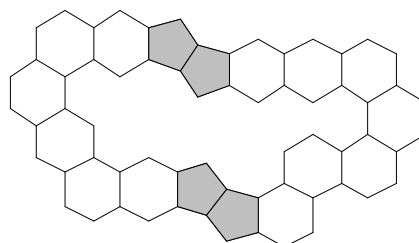

298

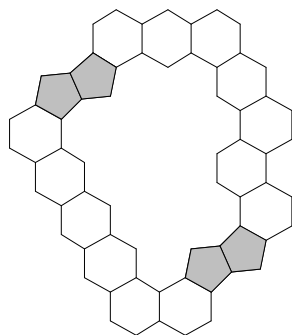

299

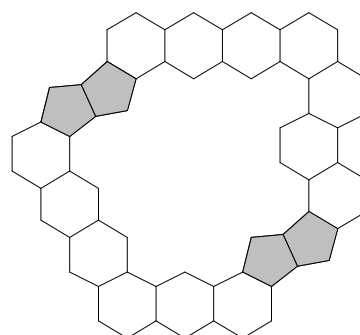

300

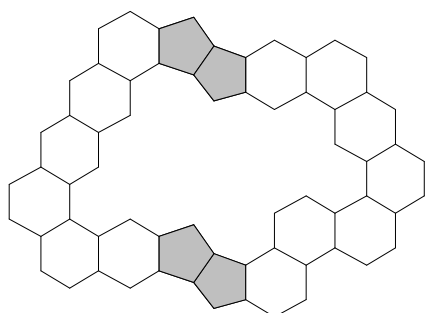

301

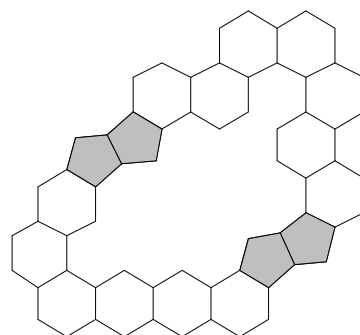

302

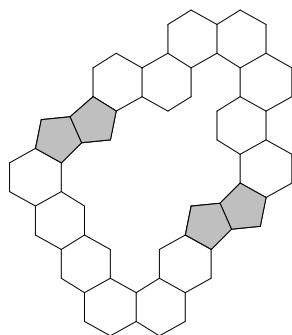

303

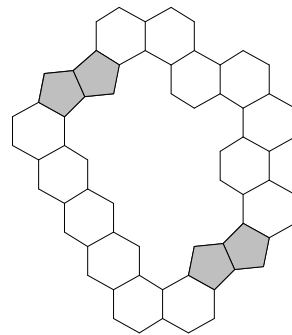

304

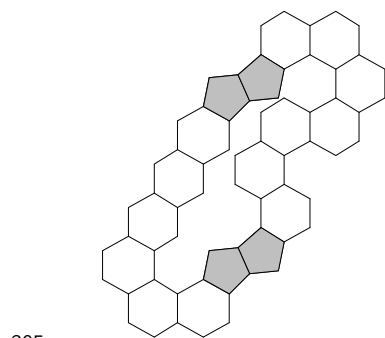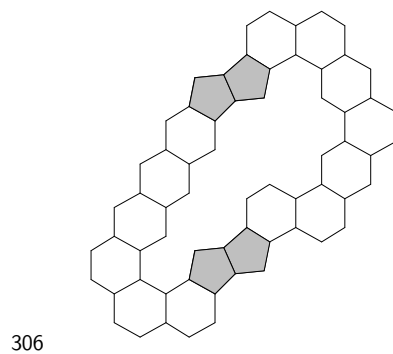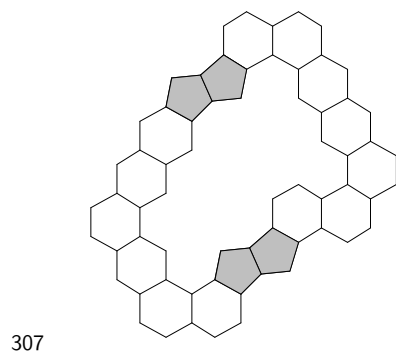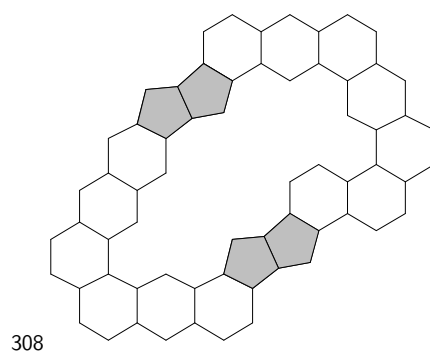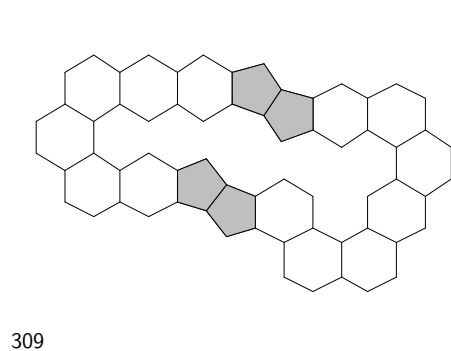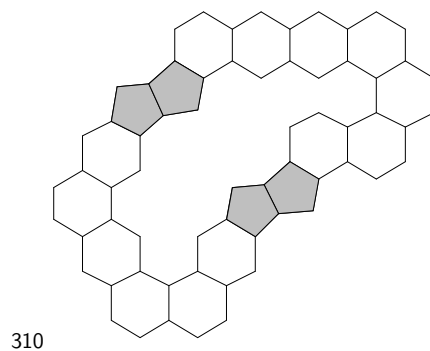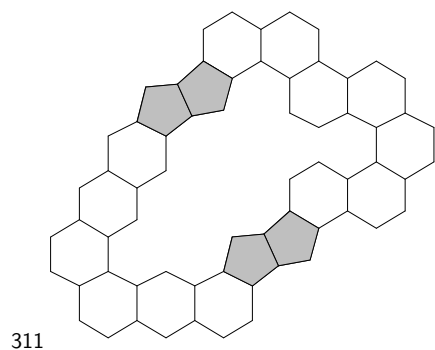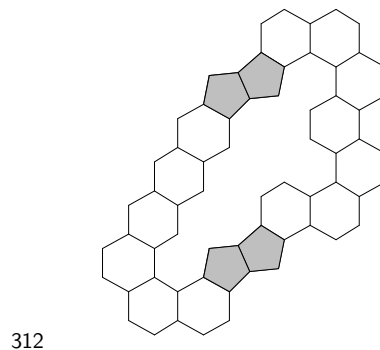

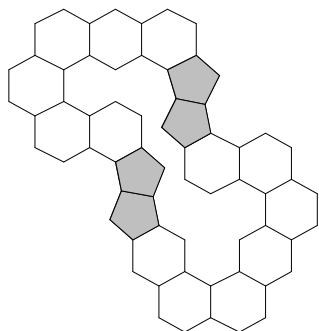

313

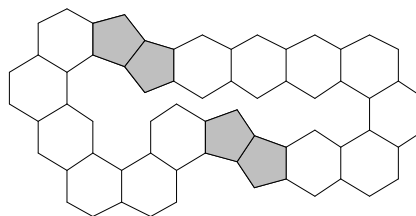

314

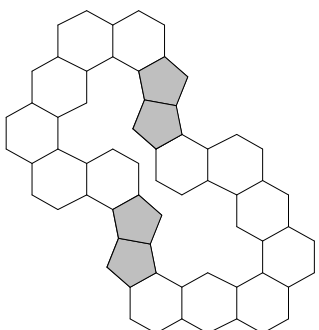

315

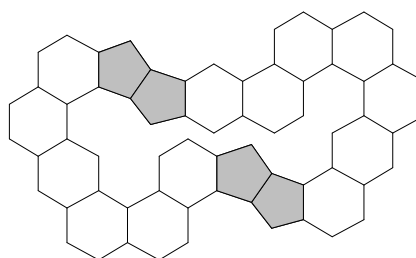

316

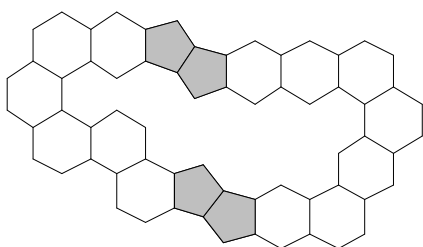

317

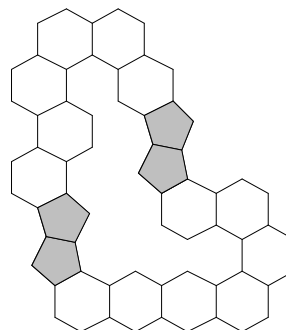

318

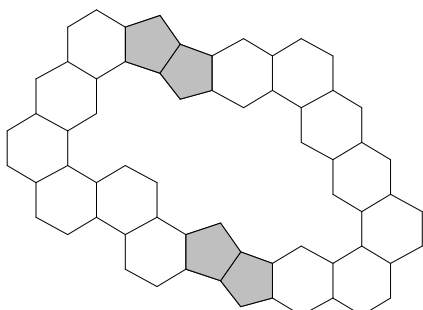

319

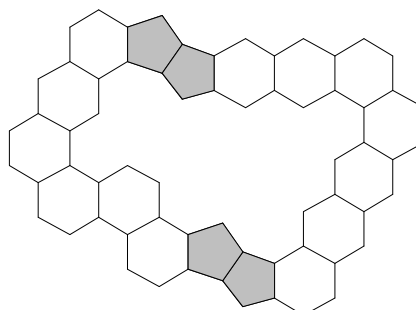

320



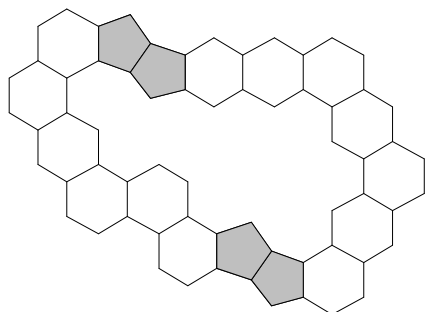

321

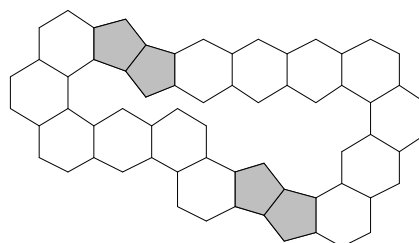

322

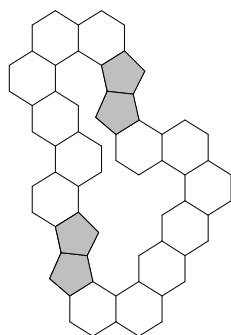

323

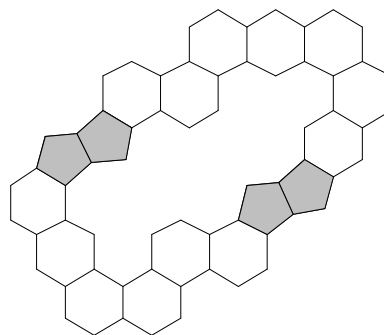

324

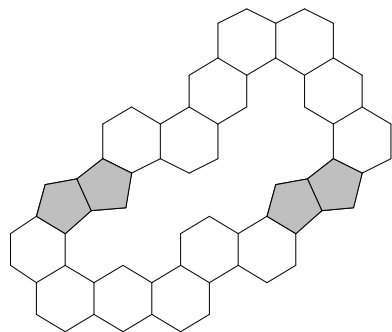

325

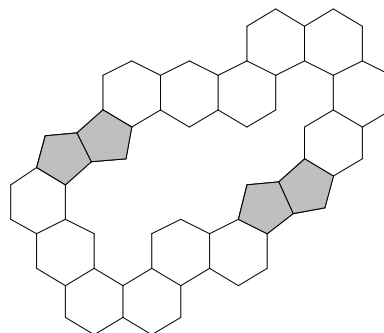

326

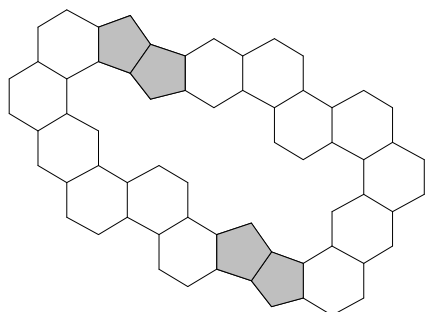

327

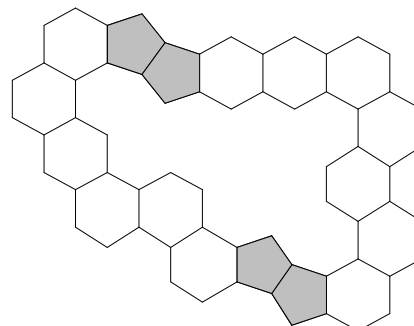

328

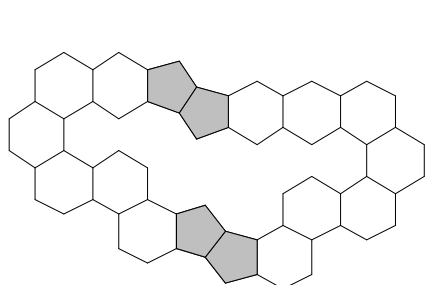

329

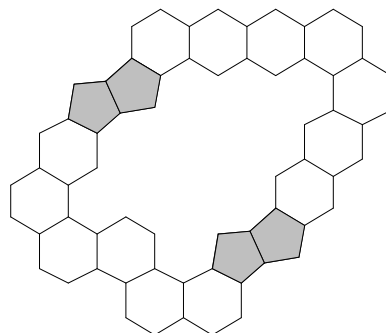

330

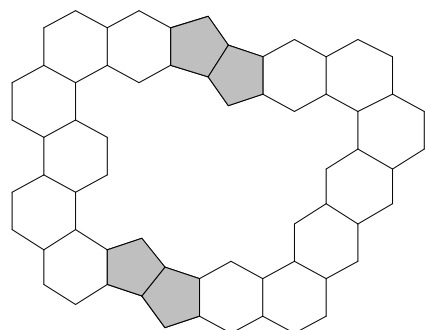

331

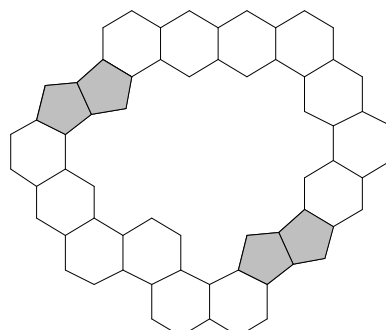

332

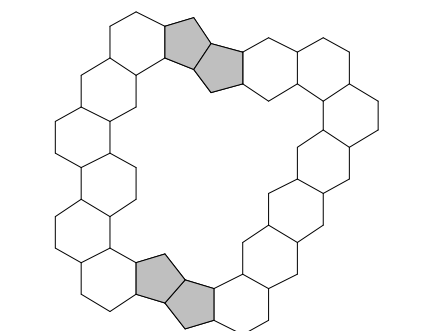

333

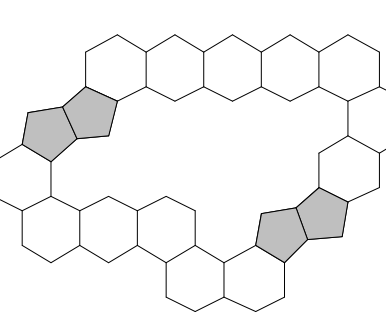

334

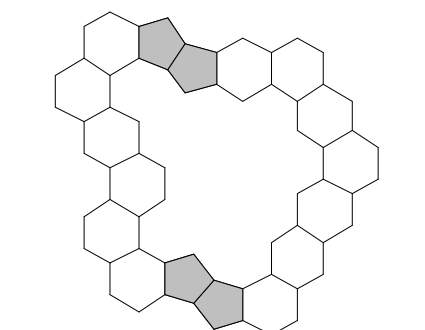

335

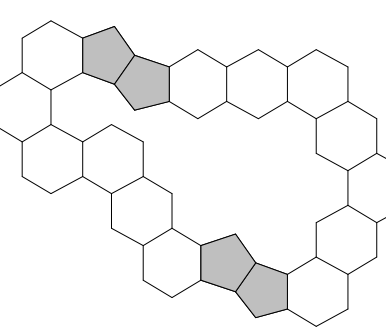

336

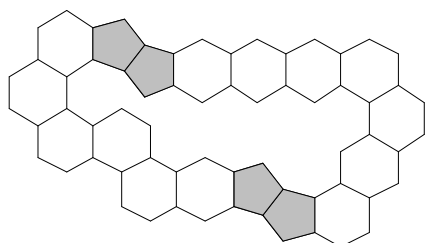

337

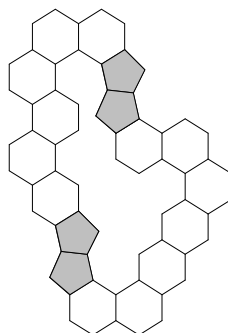

338

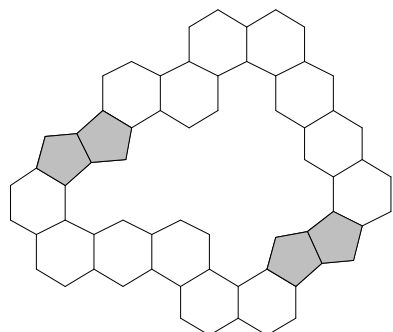

339

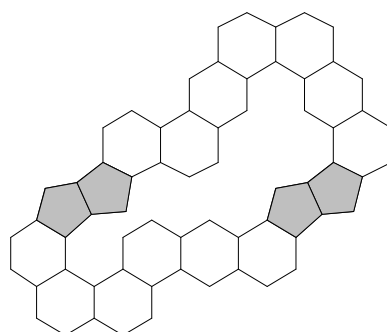

340

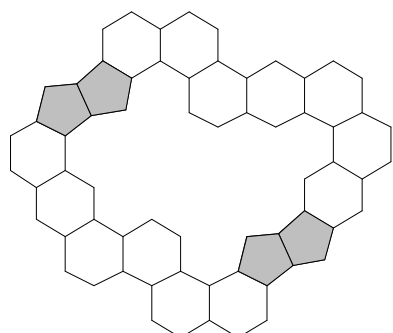

341

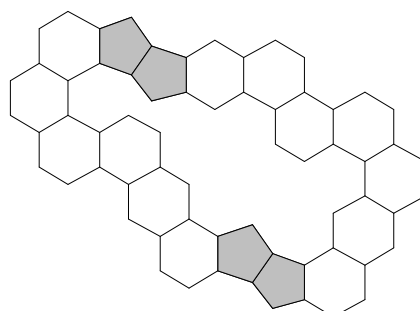

342

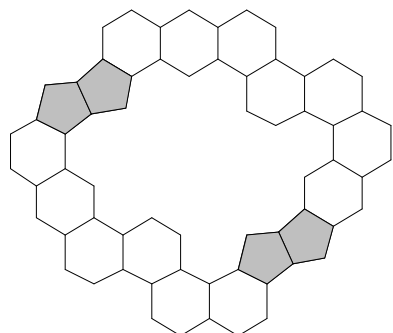

343

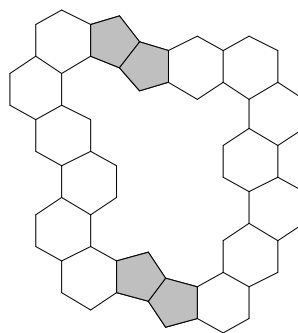

344

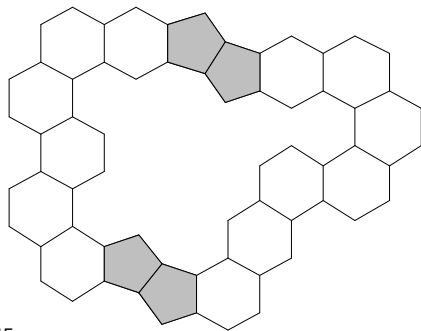

345

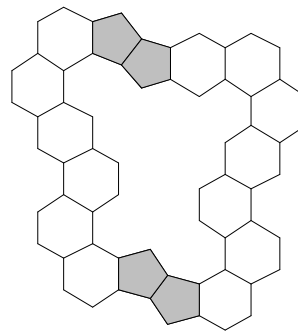

346

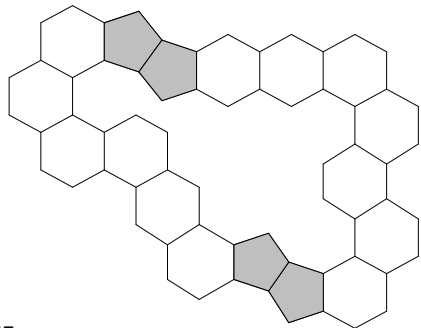

347

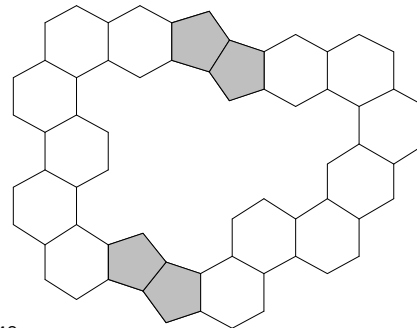

348

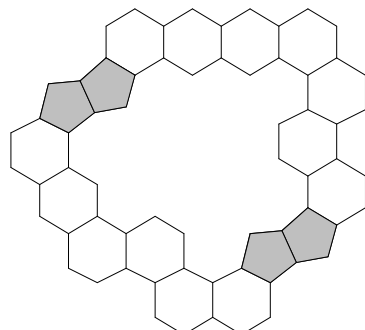

349

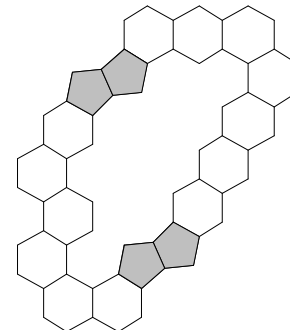

350

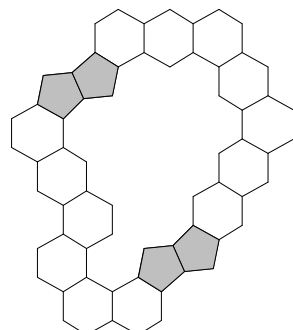

351

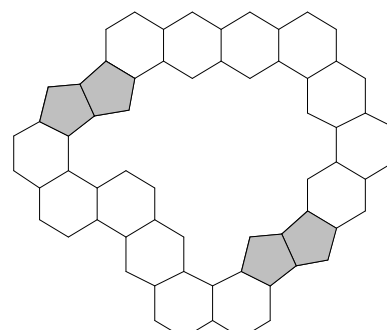

352

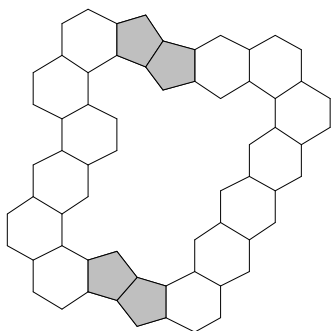

353

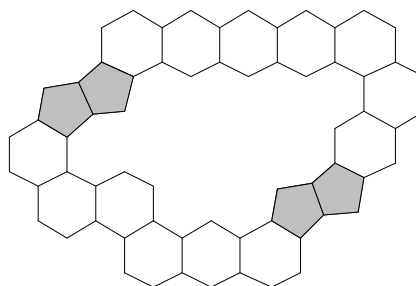

354

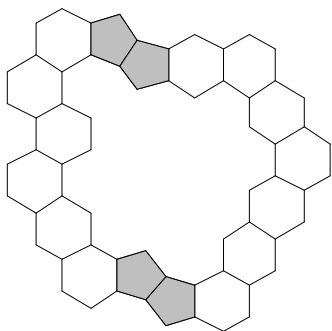

355

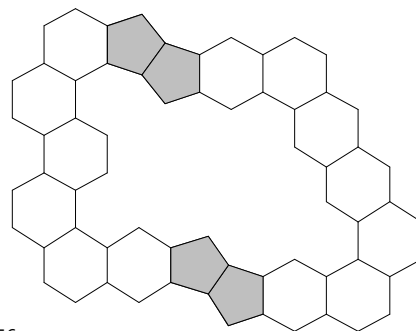

356

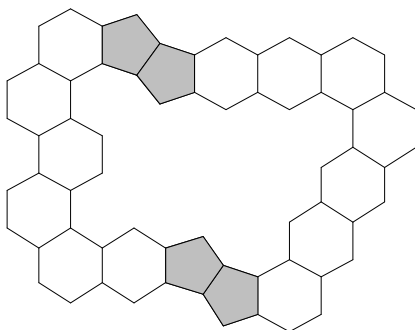

357

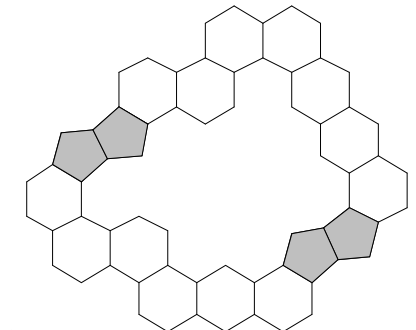

358

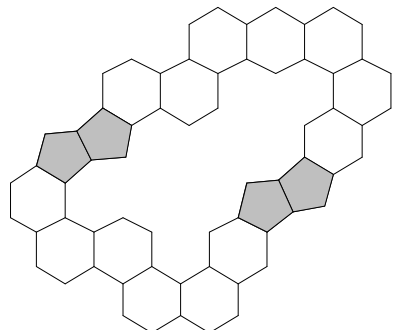

359

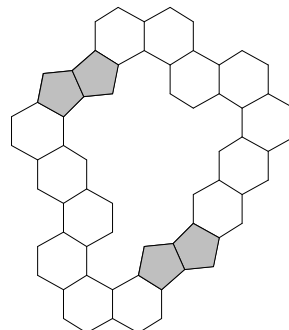

360

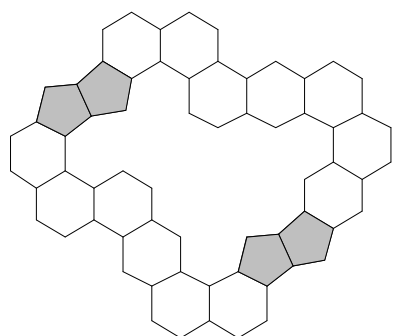

361

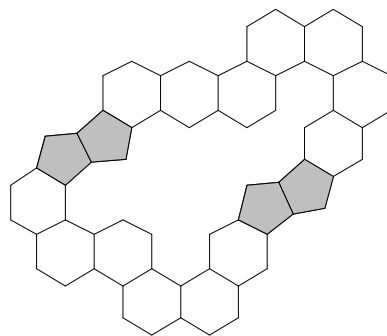

362

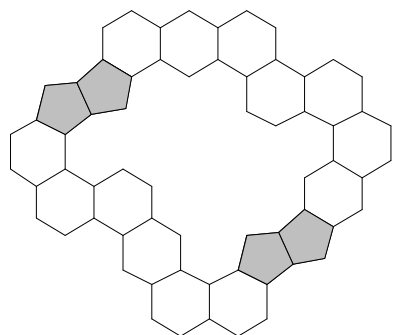

363

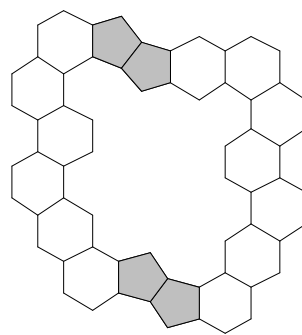

364

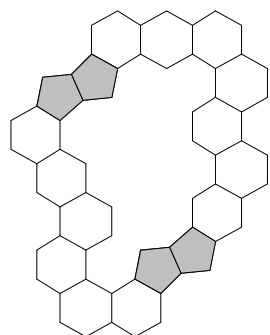

365

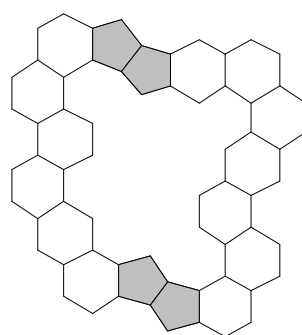

366

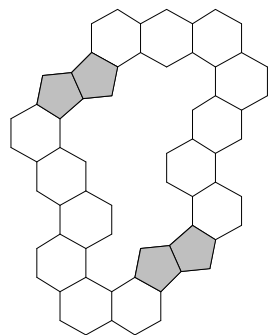

367

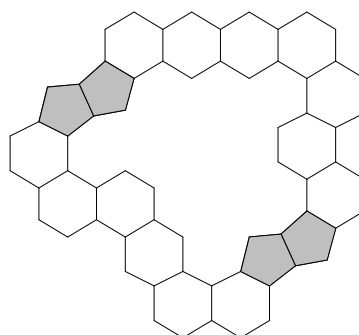

368

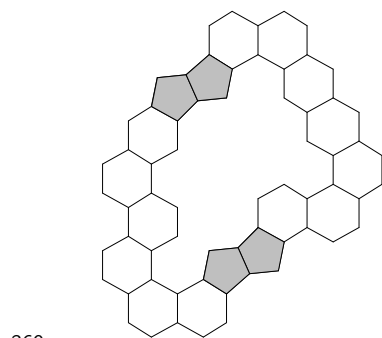

369

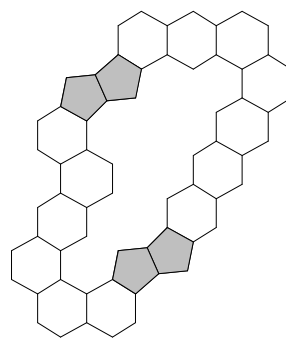

370

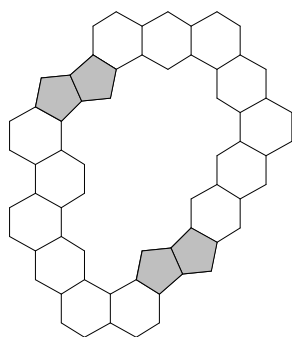

371

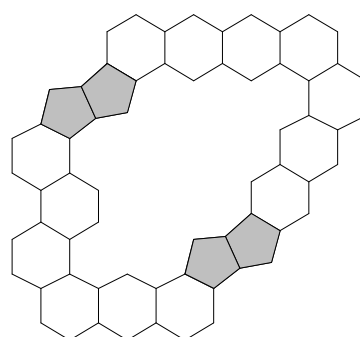

372

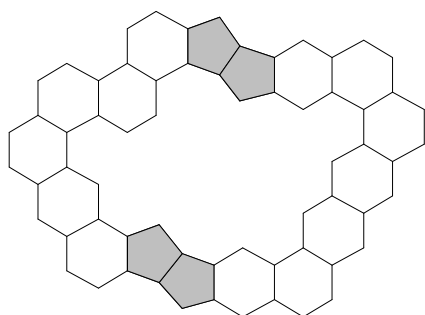

373

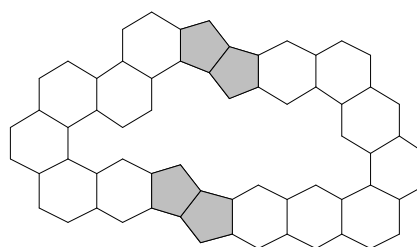

374

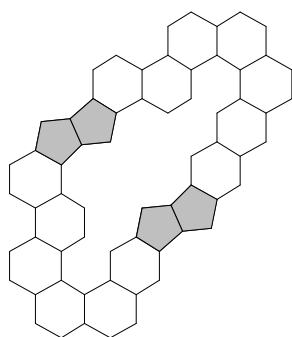

375

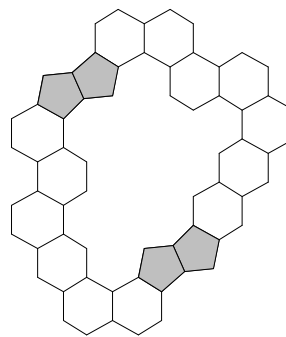

376

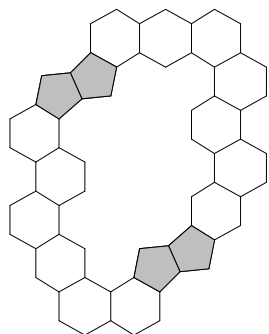

377

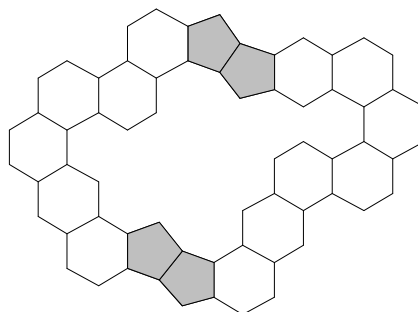

378

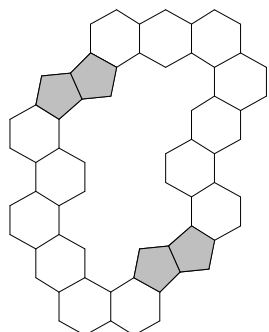

379

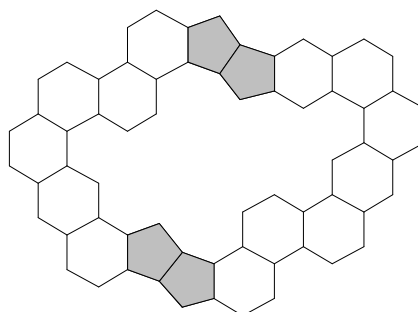

380

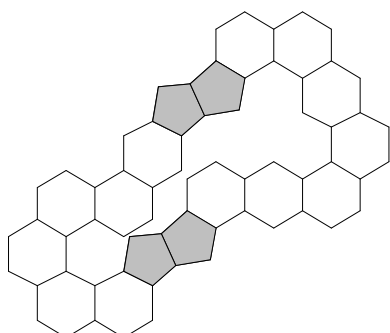

381

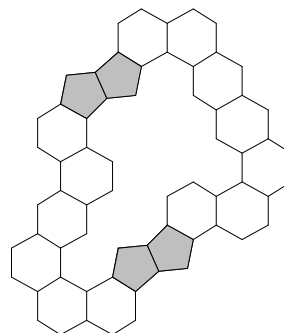

382

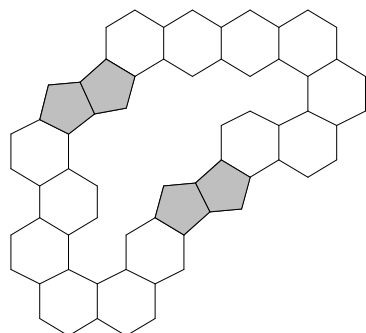

383

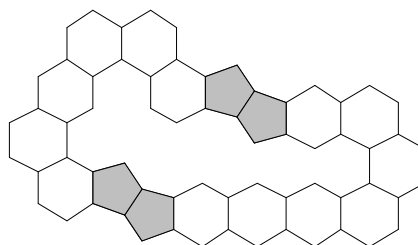

384



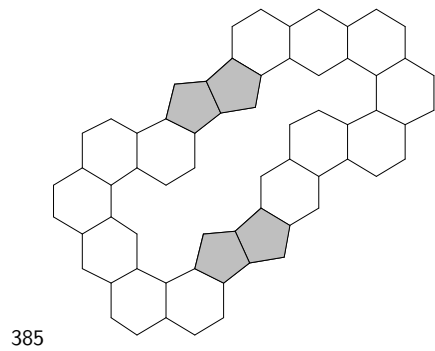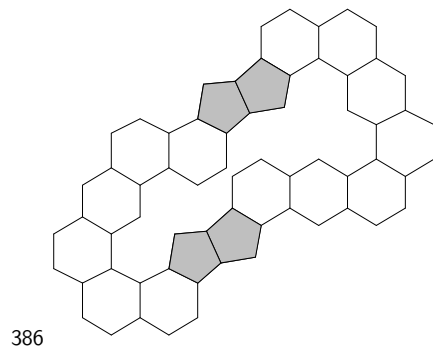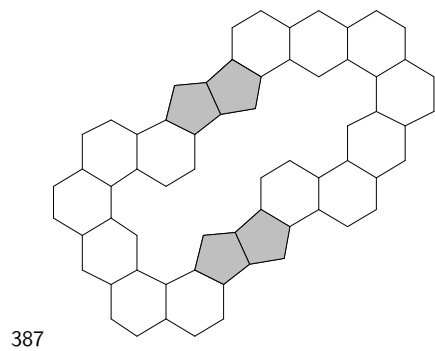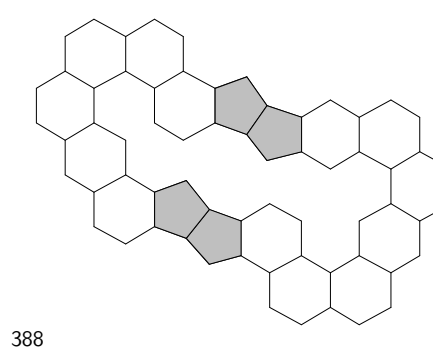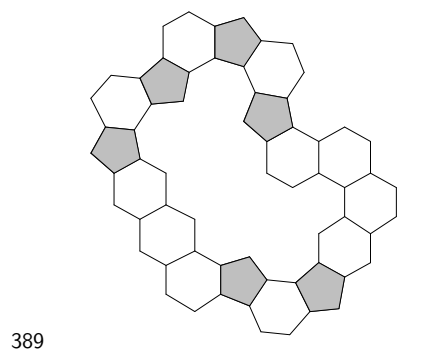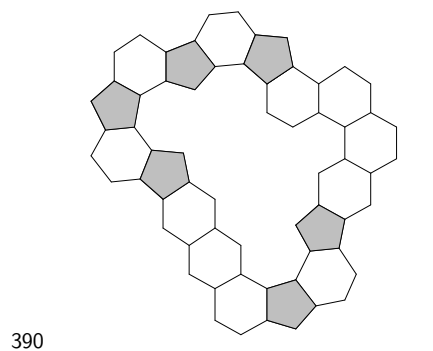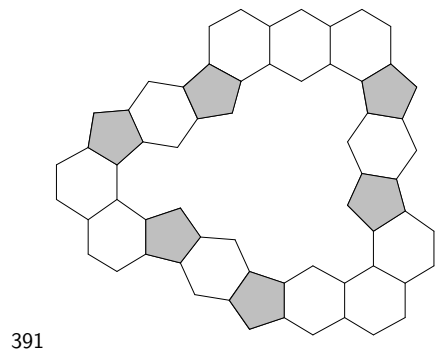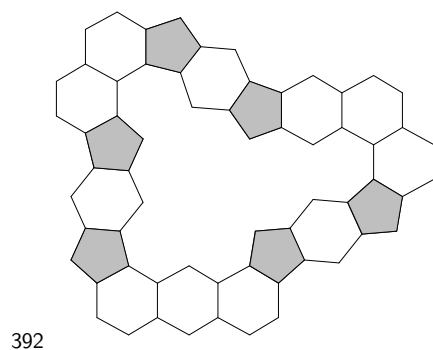

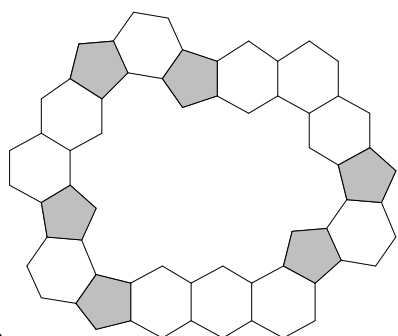

393

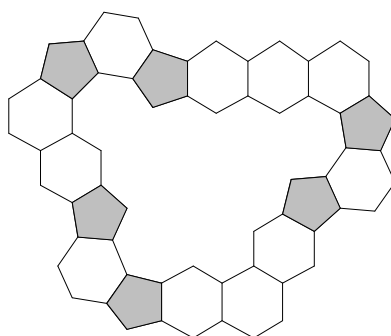

394

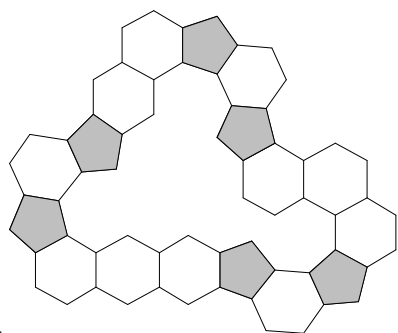

395

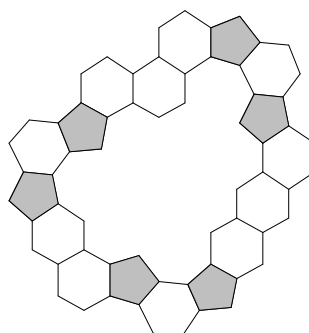

396

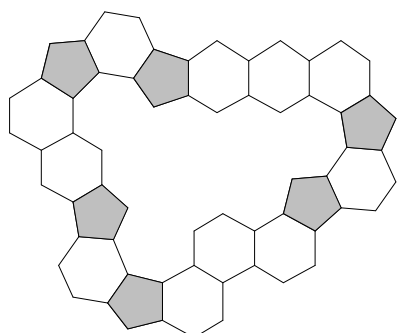

397

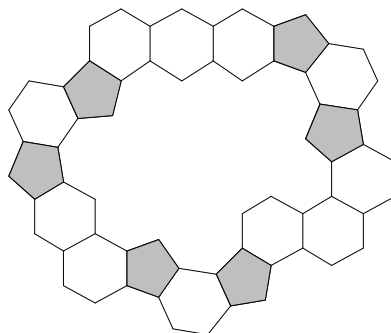

398

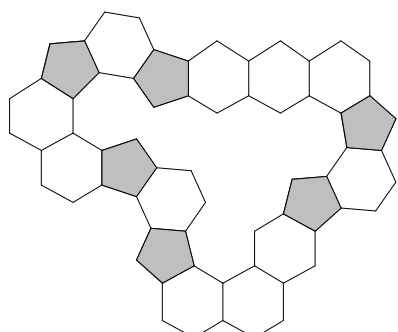

399

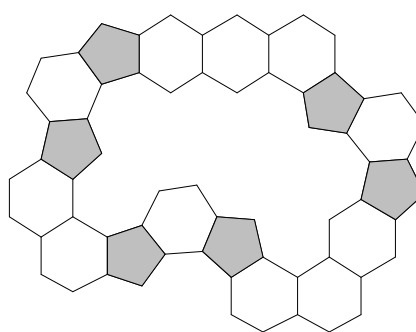

400

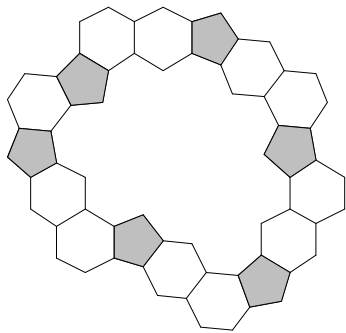

401

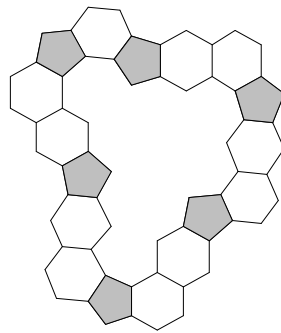

402

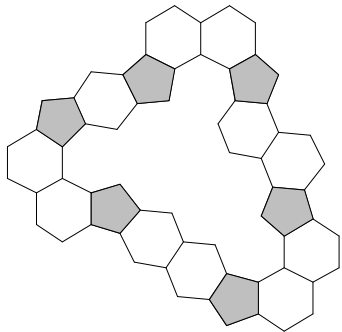

403

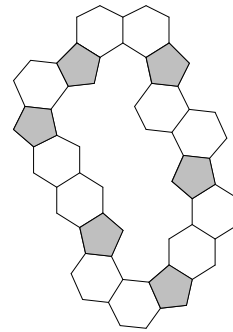

404

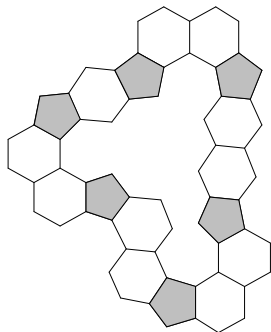

405

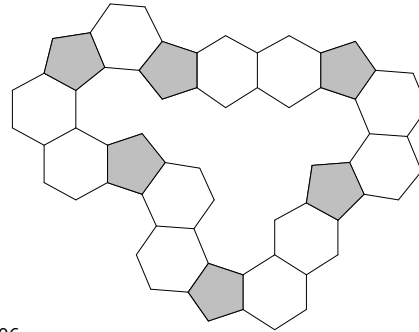

406

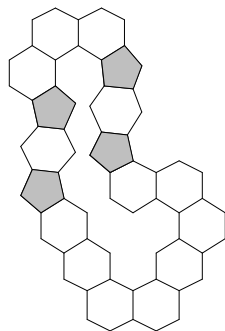

407

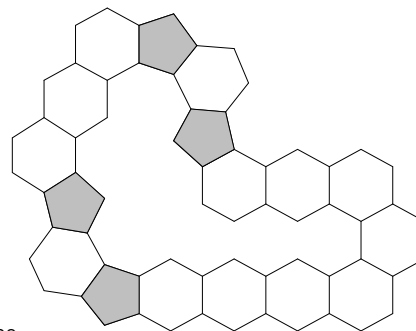

408

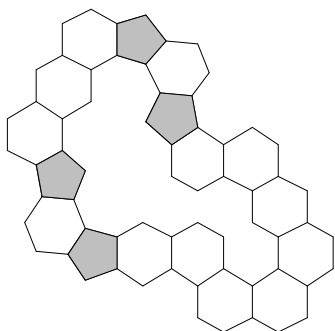

409

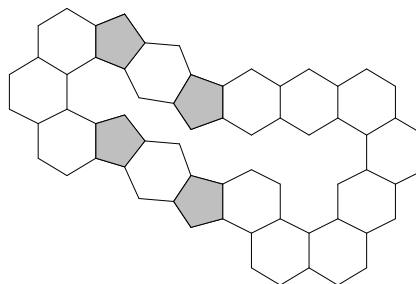

410

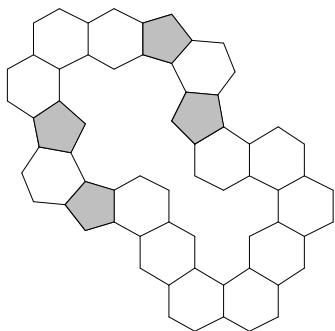

411

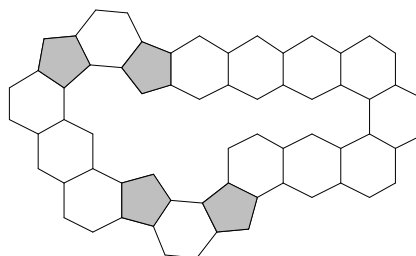

412

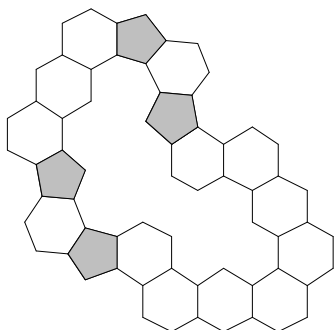

413

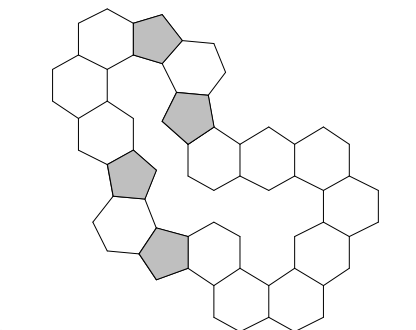

414

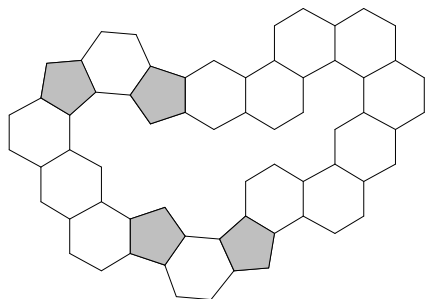

415

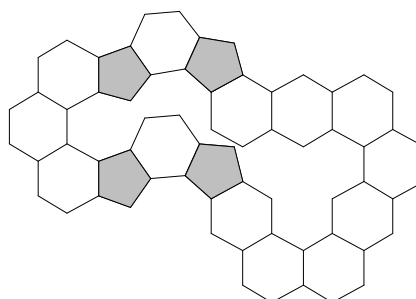

416

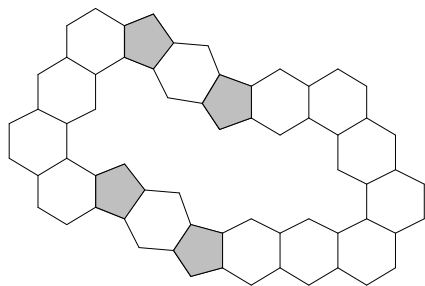

417

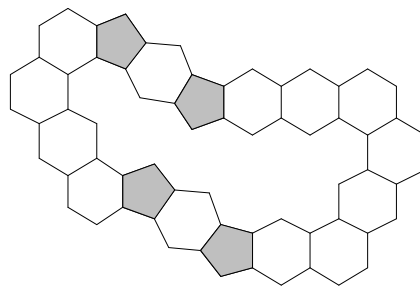

418

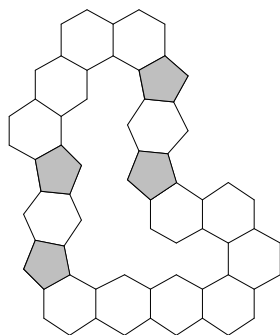

419

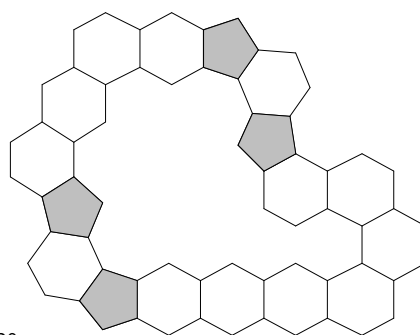

420

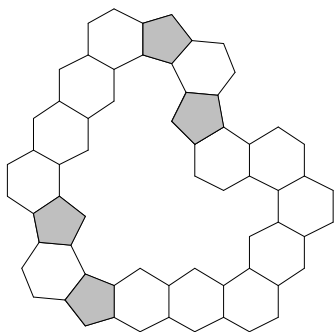

421

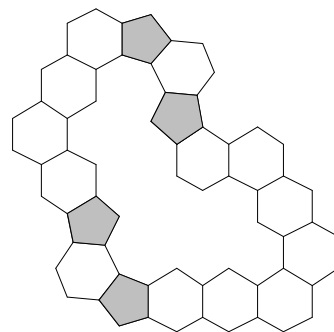

422

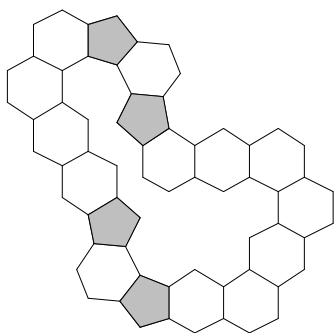

423

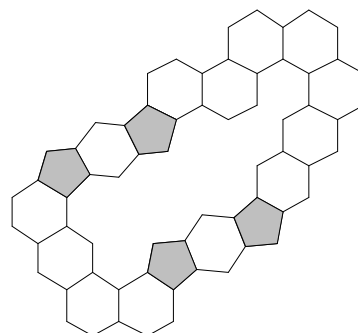

424

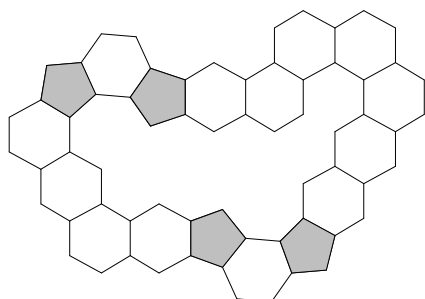

425

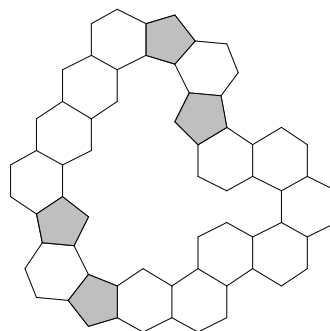

426

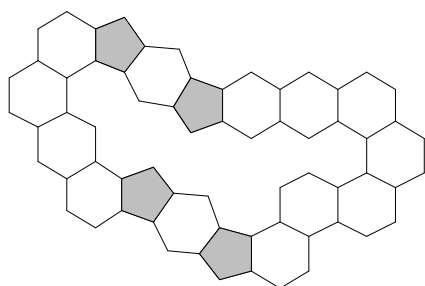

427

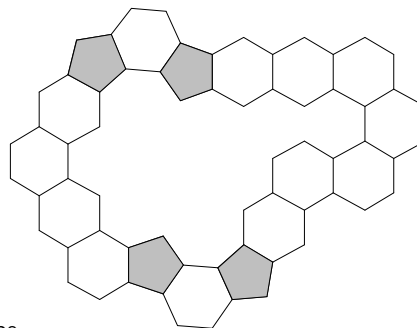

428

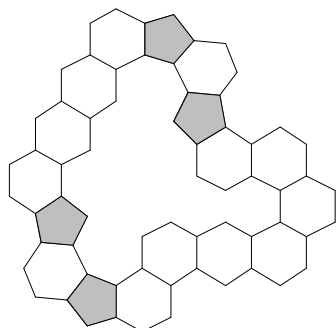

429

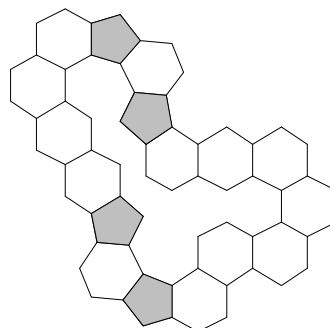

430

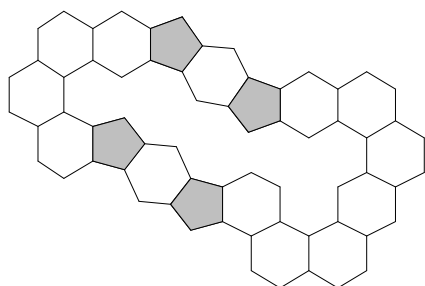

431

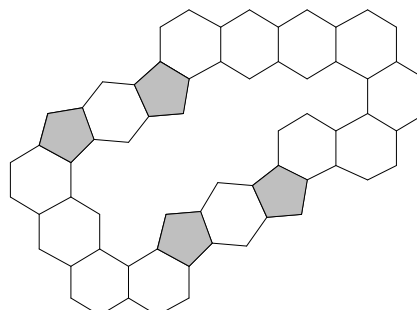

432

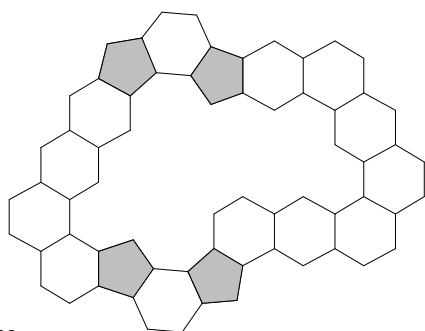

433

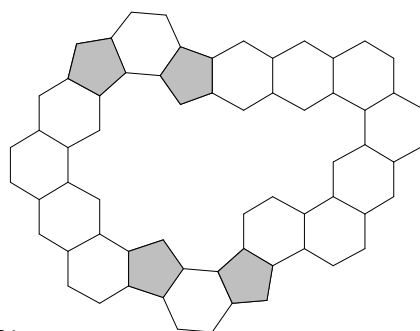

434

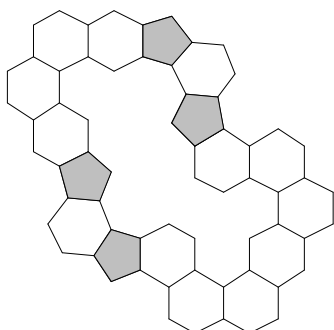

435

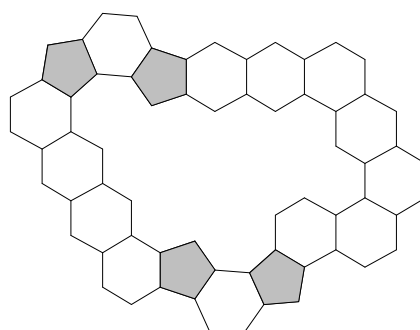

436

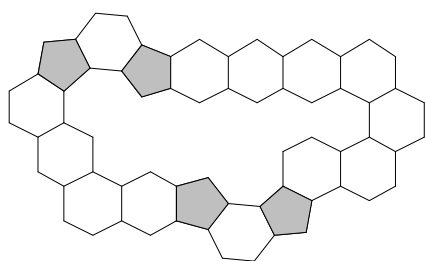

437

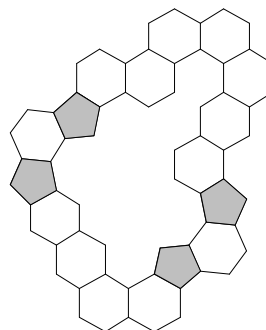

438

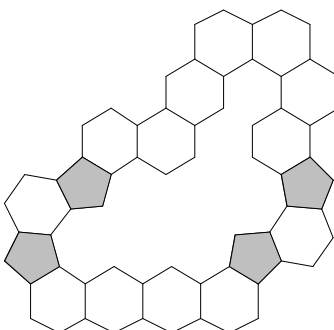

439

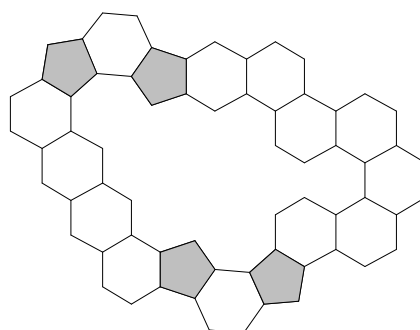

440

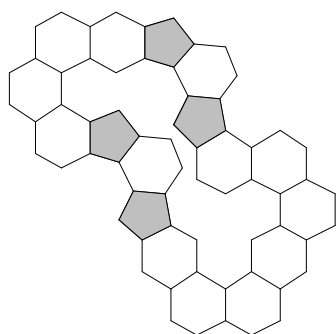

441

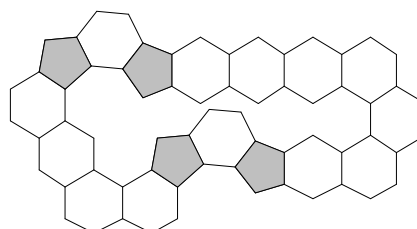

442

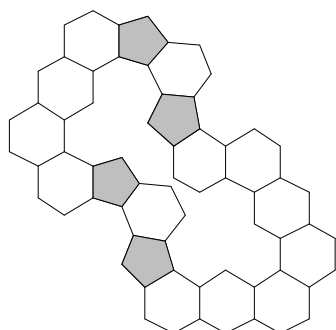

443

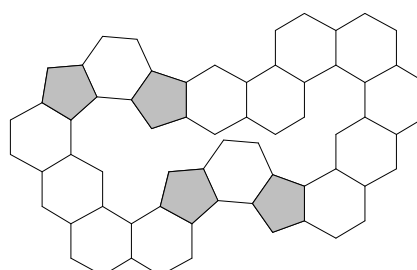

444

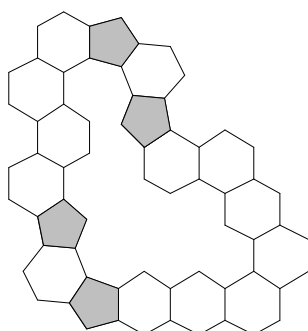

445

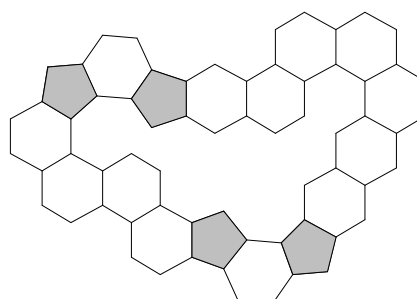

446

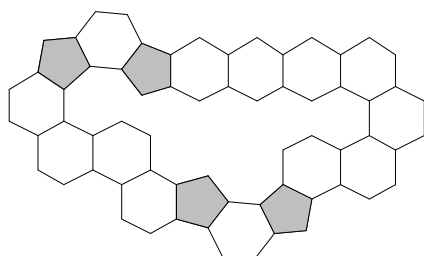

447

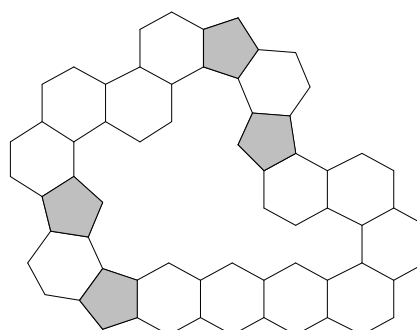

448



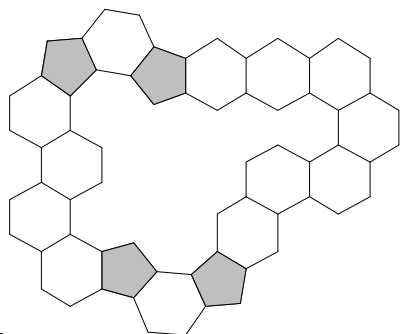

449

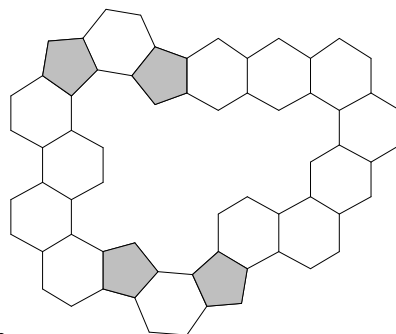

450

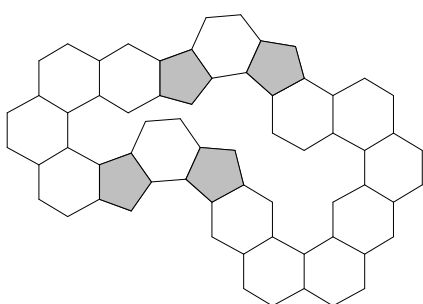

451

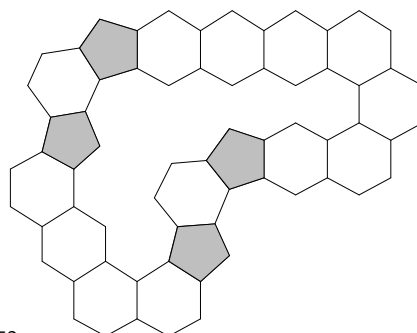

452

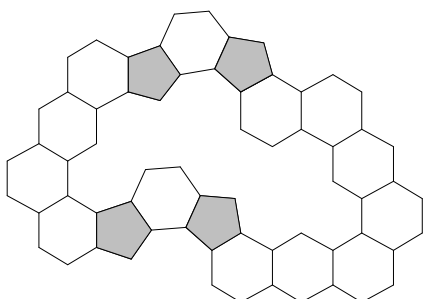

453

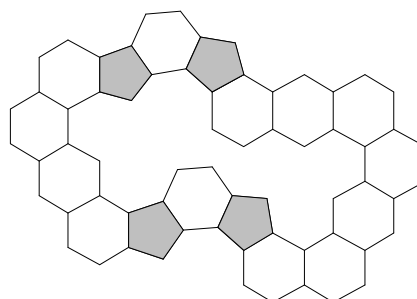

454

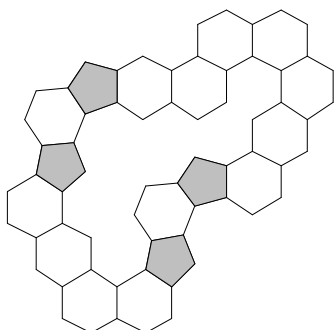

455

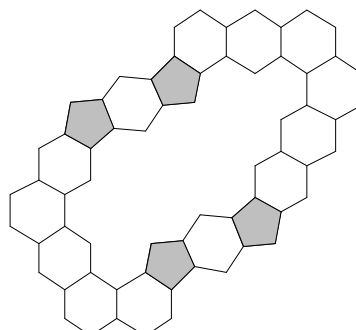

456

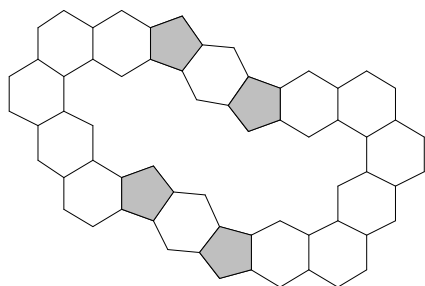

457

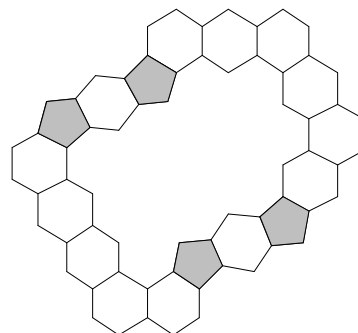

458

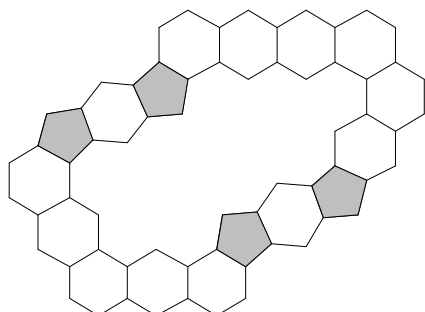

459

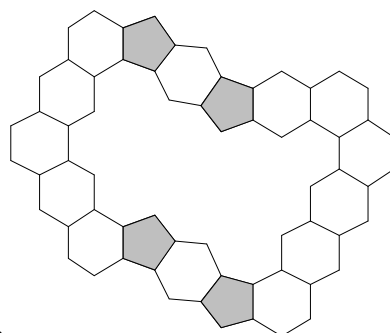

460

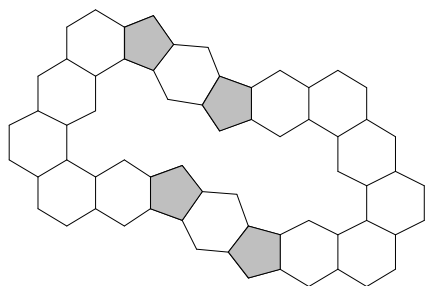

461

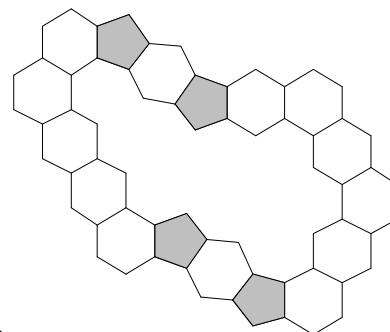

462

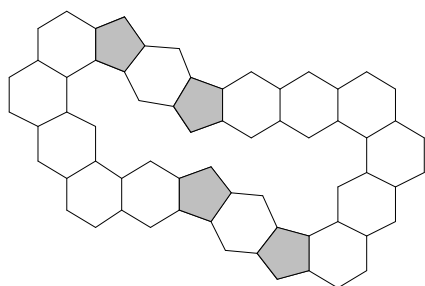

463

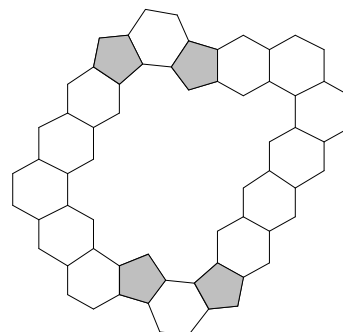

464

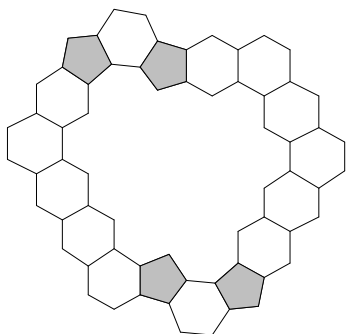

465

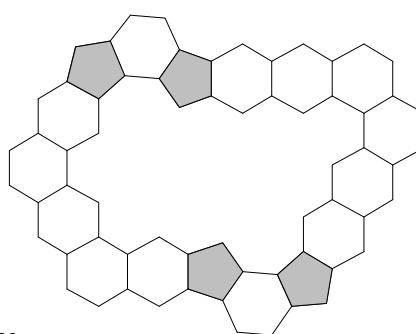

466

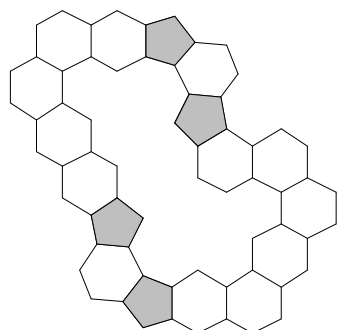

467

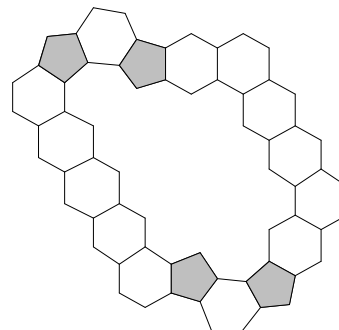

468

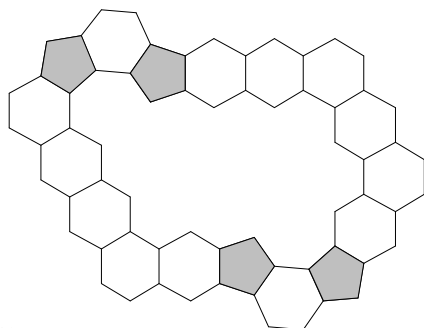

469

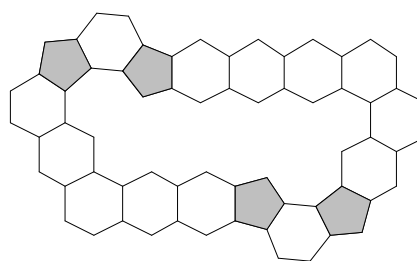

470

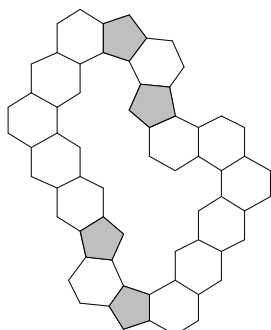

471

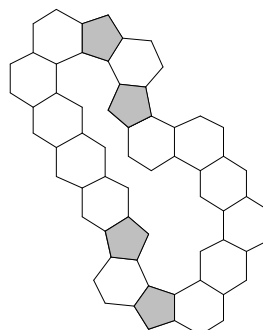

472

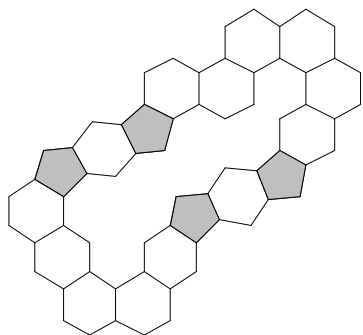

473

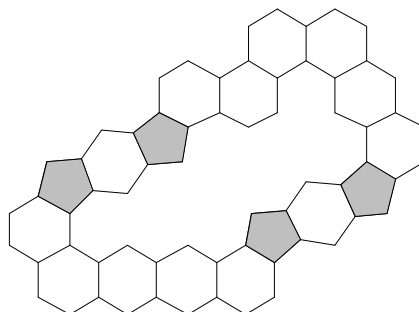

474

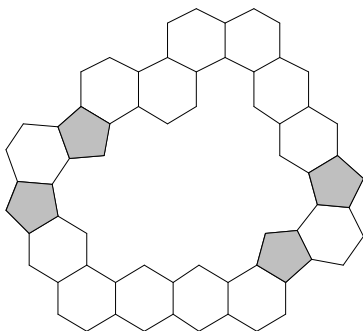

475

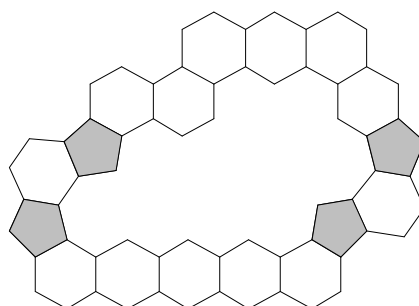

476

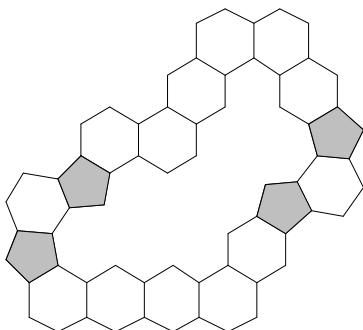

477

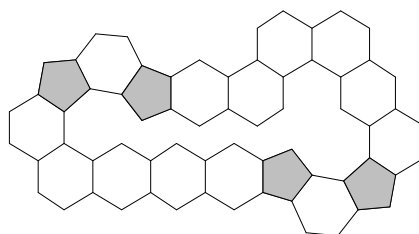

478

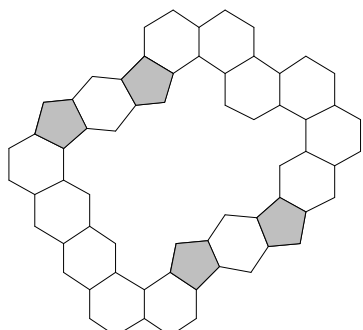

479

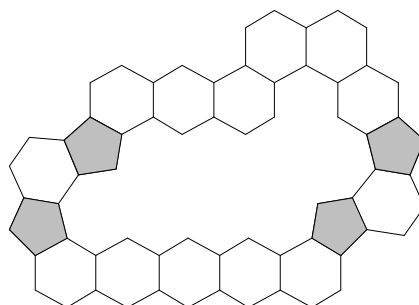

480

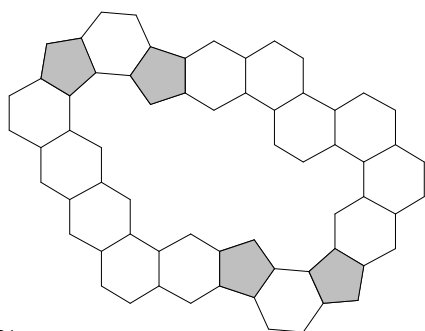

481

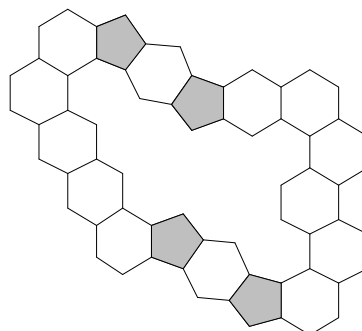

482

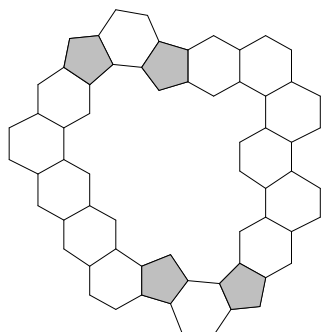

483

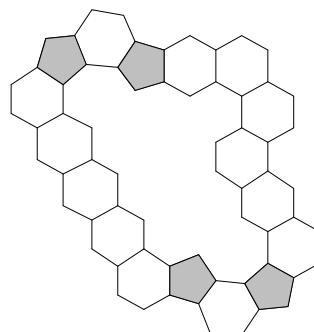

484

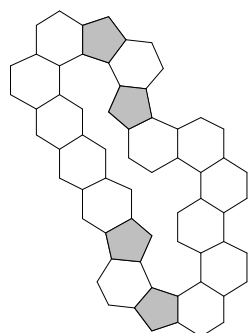

485

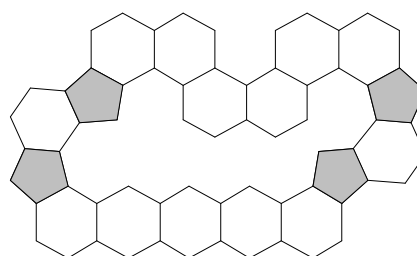

486

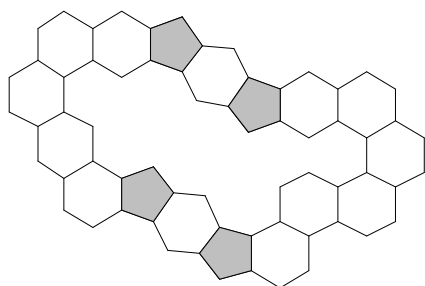

487

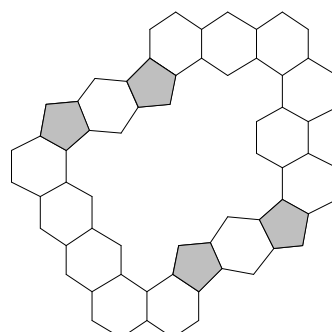

488

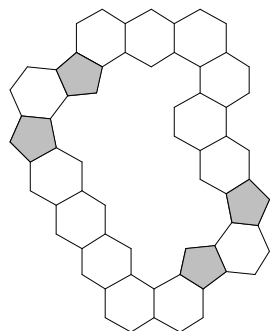

489

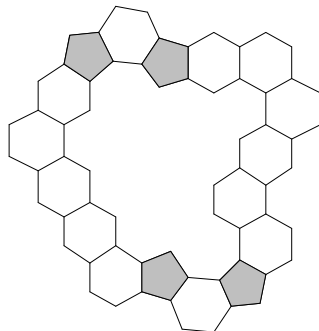

490

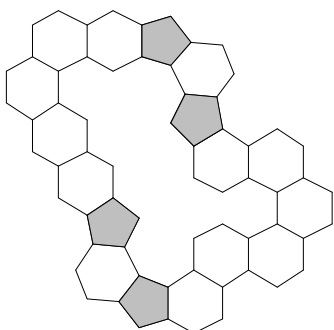

491

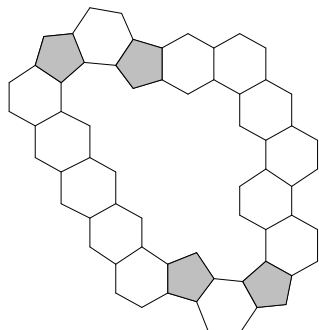

492

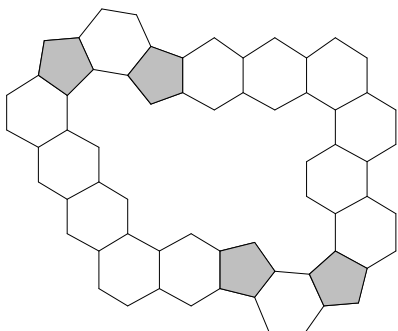

493

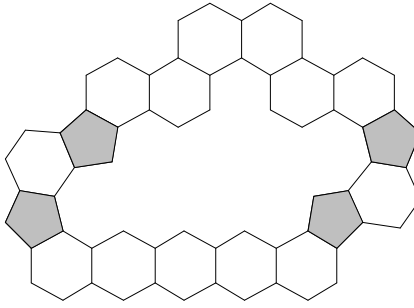

494

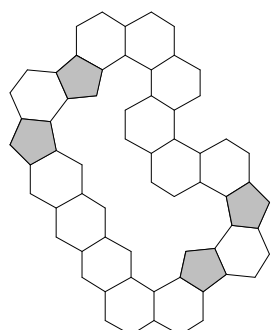

495

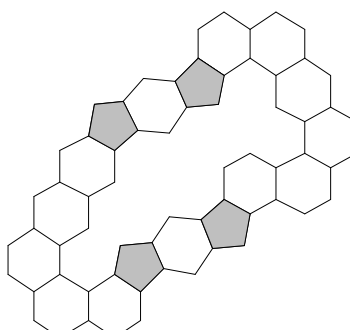

496

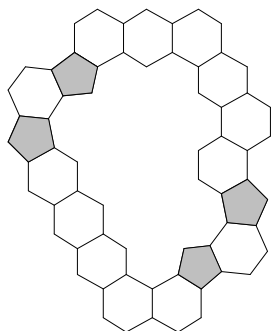

497

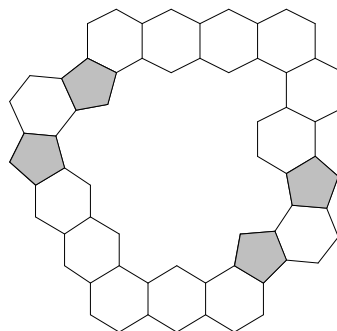

498

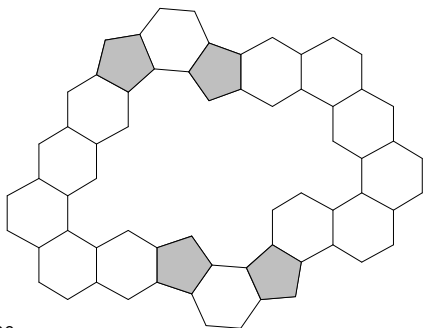

499

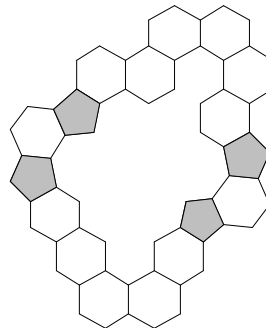

500

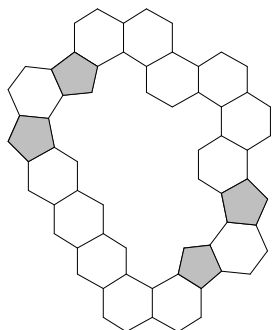

501

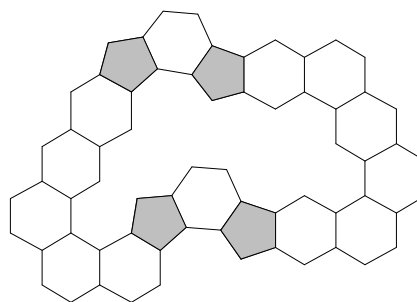

502

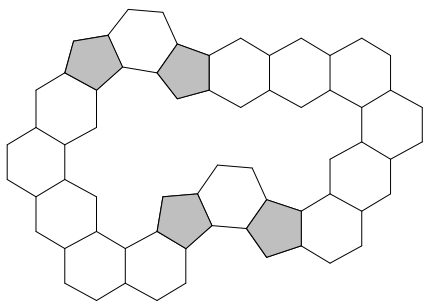

503

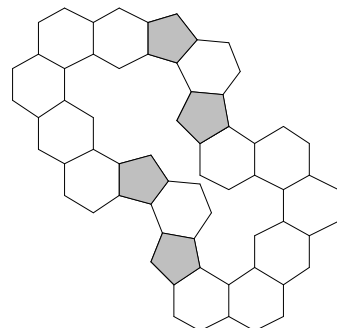

504

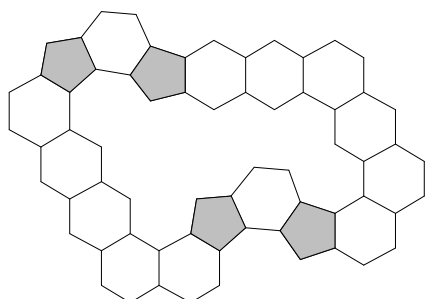

505

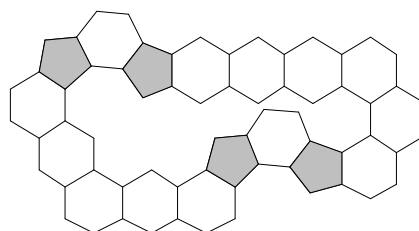

506

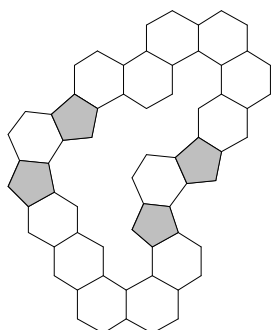

507

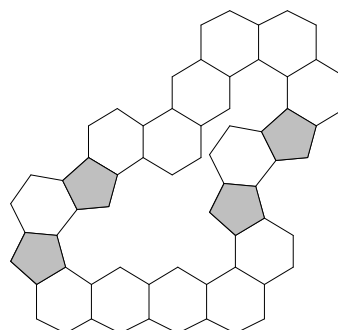

508

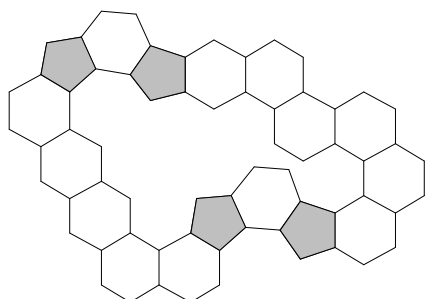

509

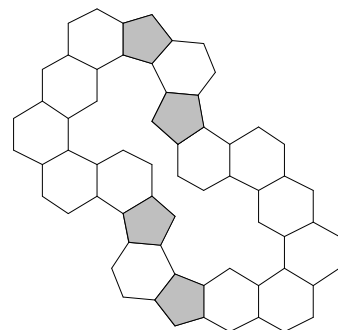

510

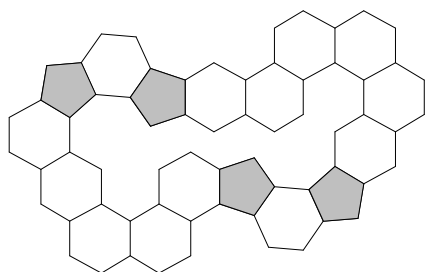

511

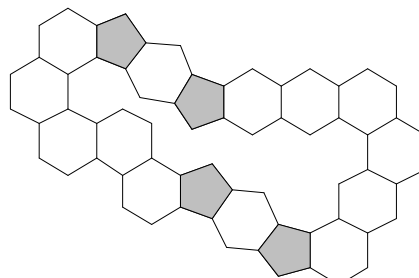

512



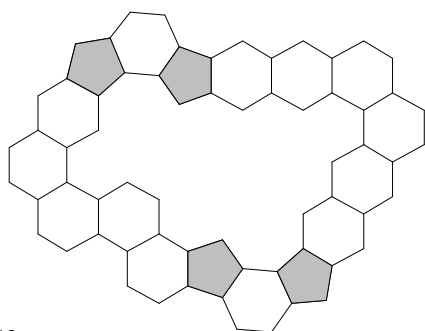

513

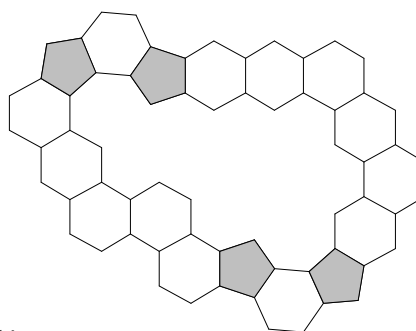

514

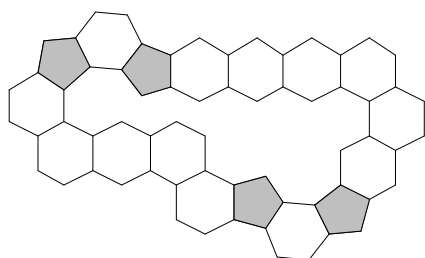

515

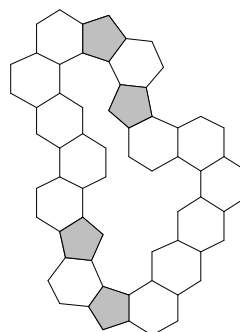

516

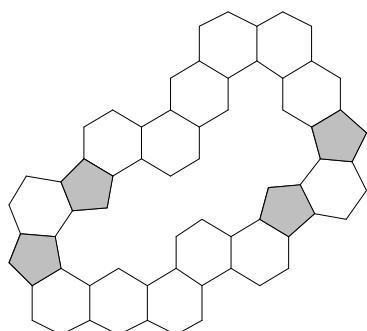

517

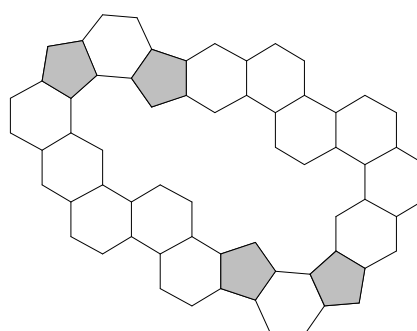

518

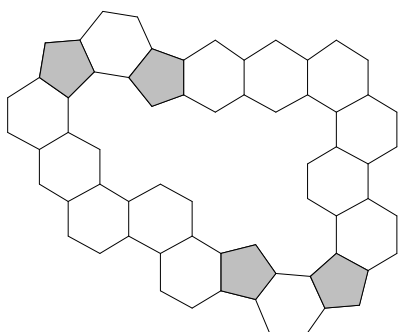

519

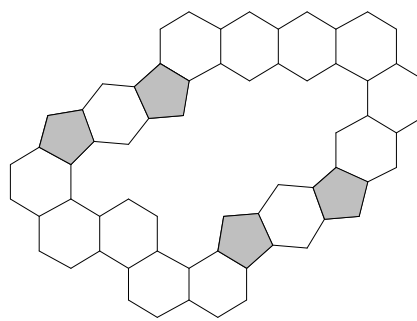

520

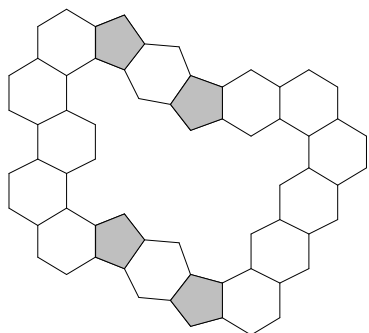

521

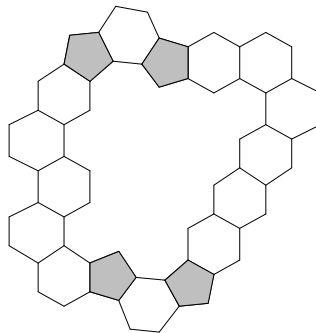

522

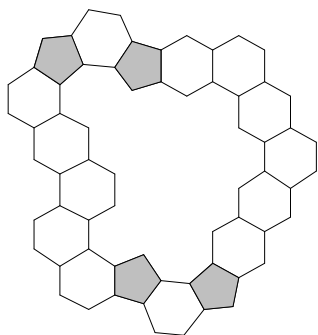

523

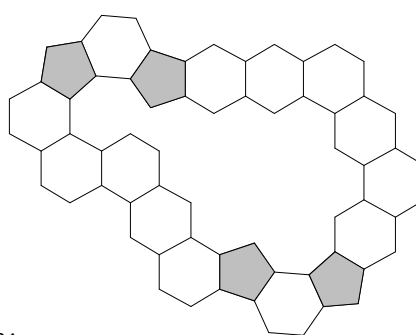

524

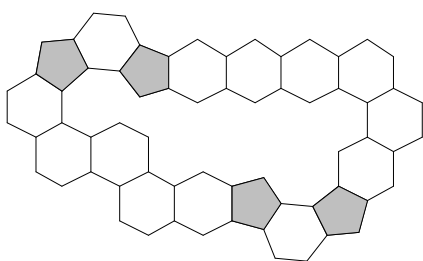

525

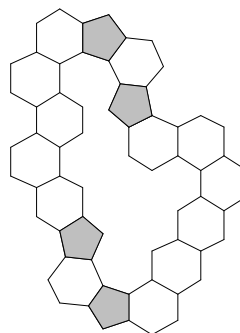

526

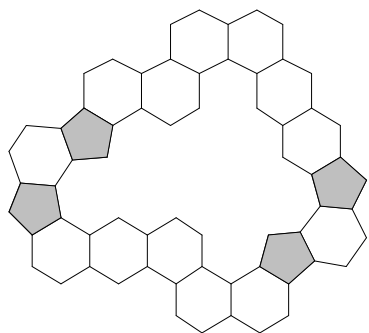

527

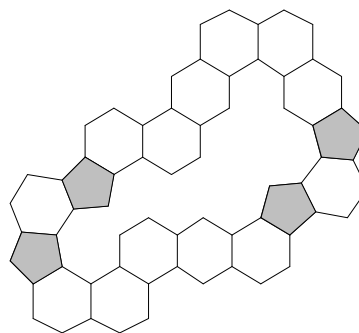

528

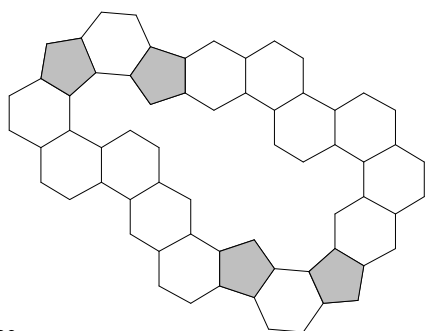

529

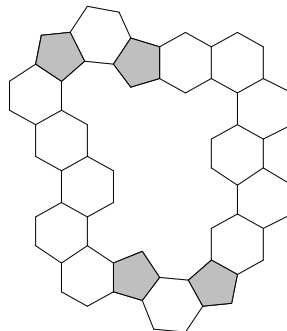

530

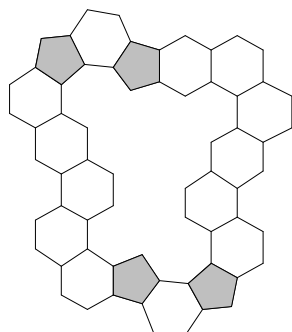

531

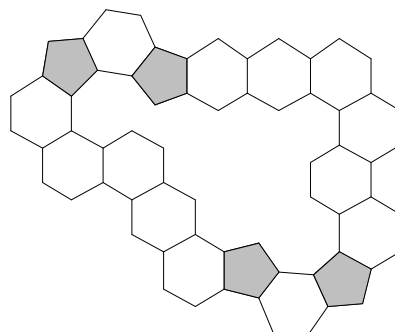

532

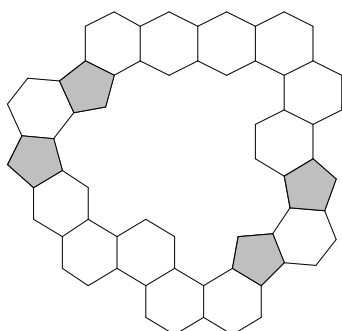

533

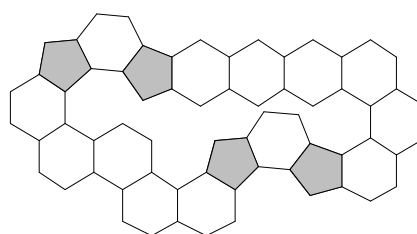

534

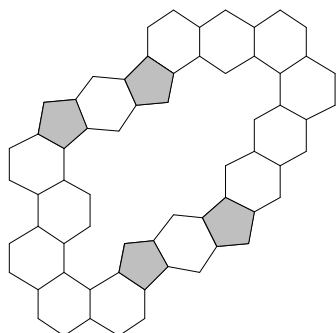

535

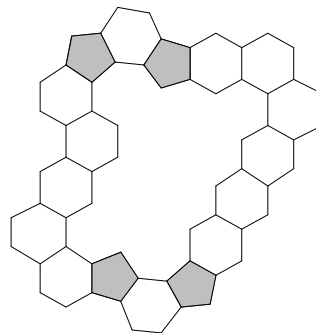

536

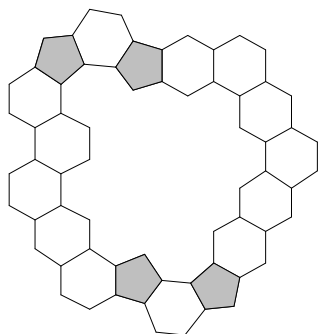

537

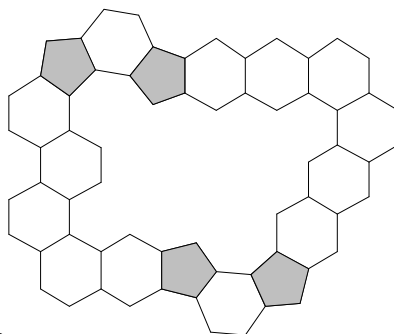

538

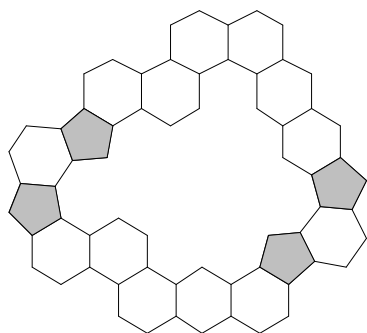

539

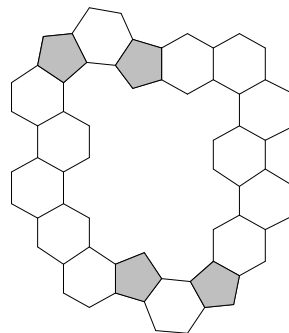

540

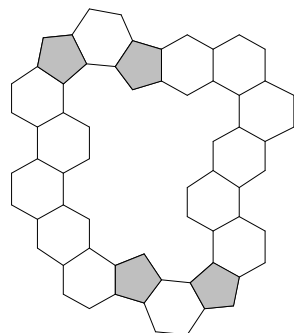

541

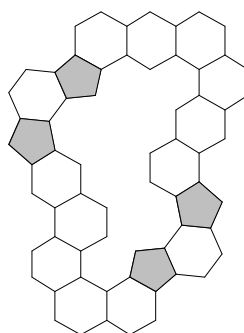

542

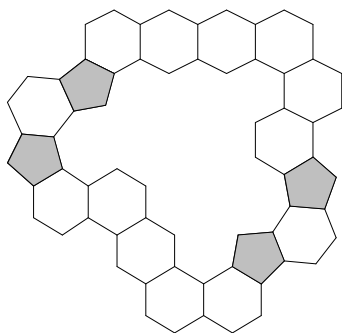

543

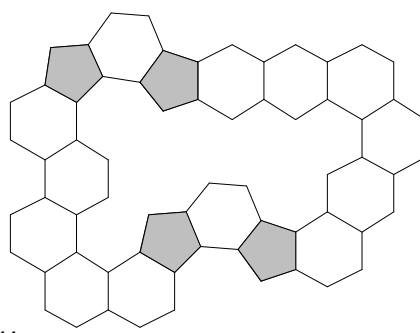

544

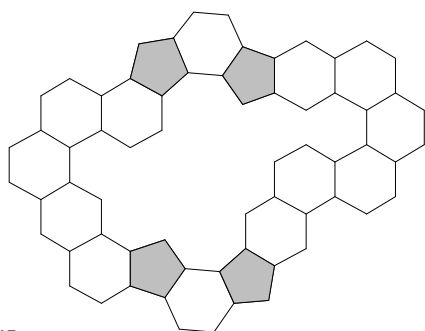

545

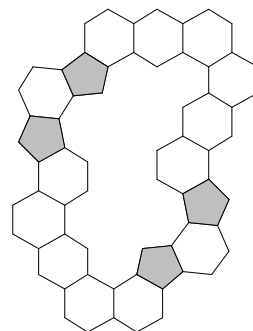

546

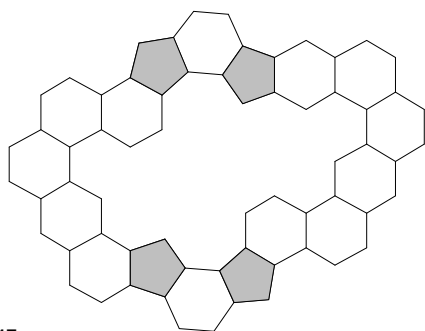

547

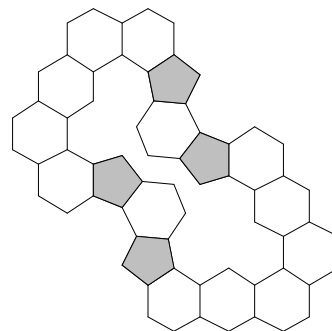

548

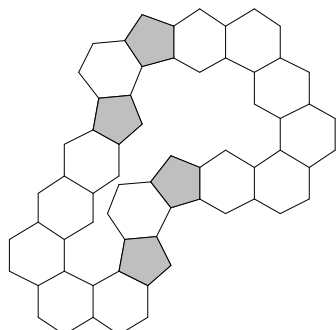

549

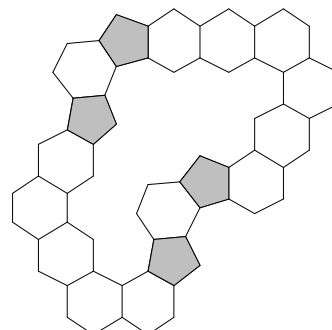

550

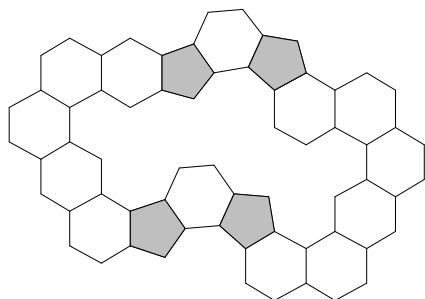

551

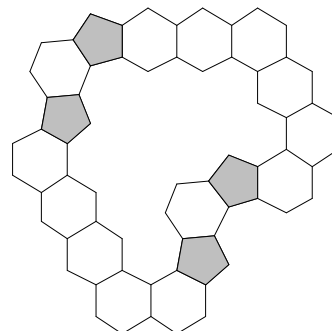

552

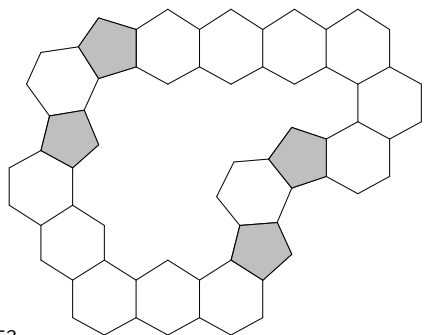

553

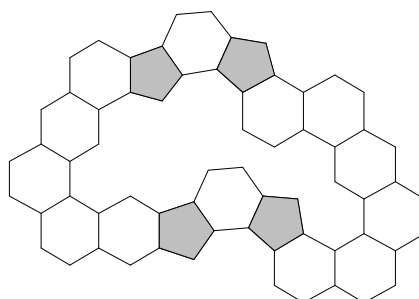

554

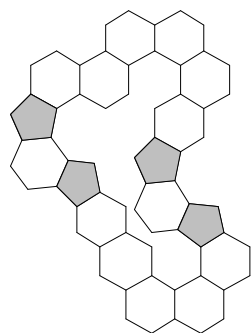

555

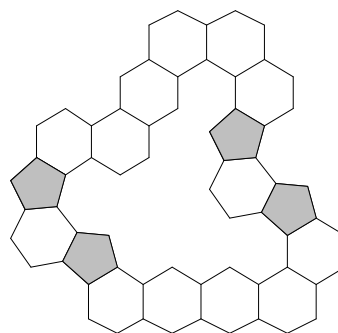

556

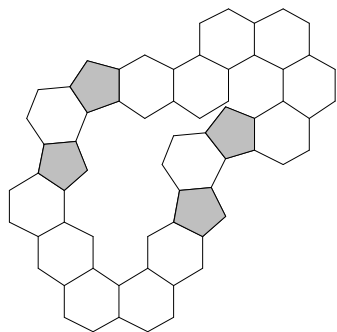

557

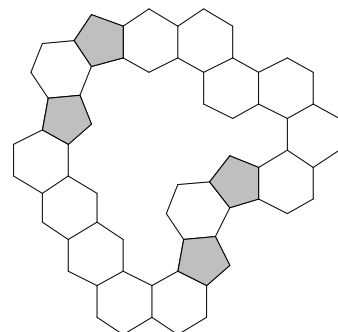

558

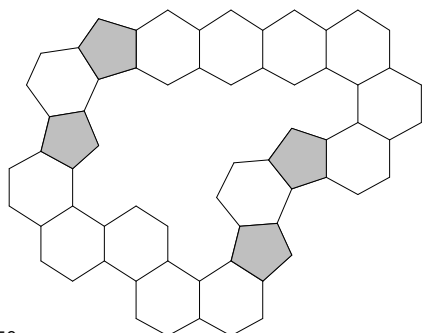

559

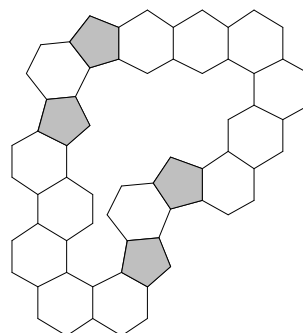

560

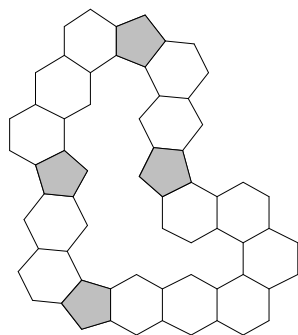

561

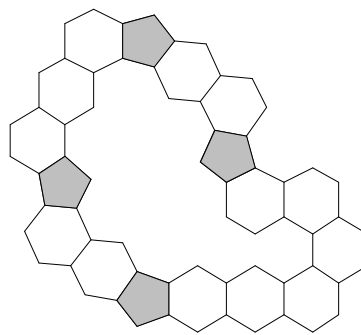

562

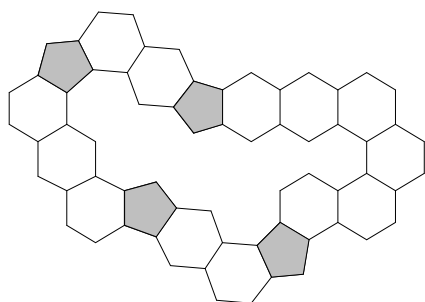

563

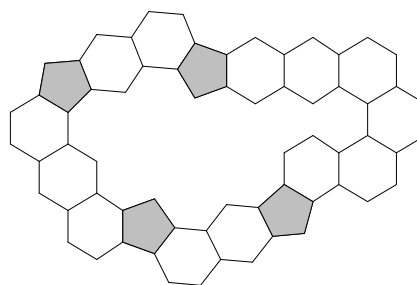

564

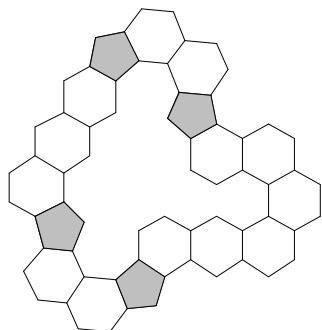

565

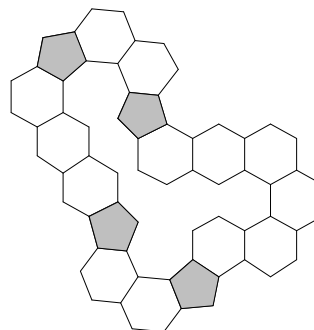

566

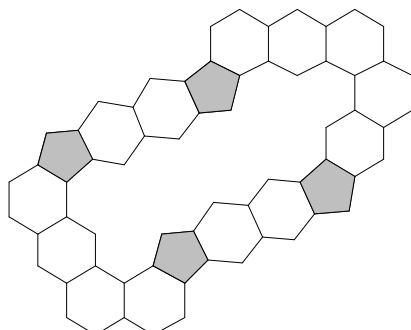

567

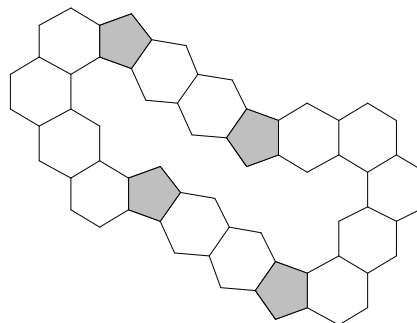

568

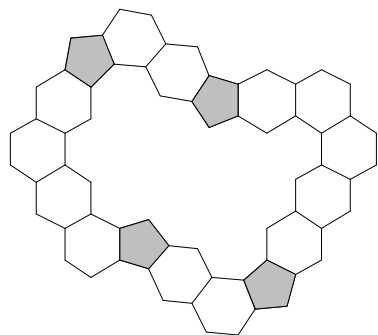

569

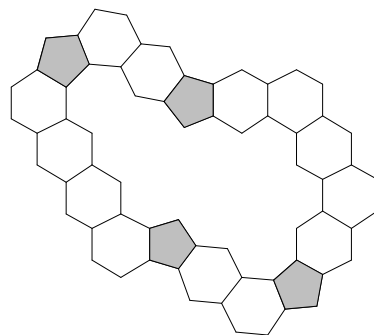

570

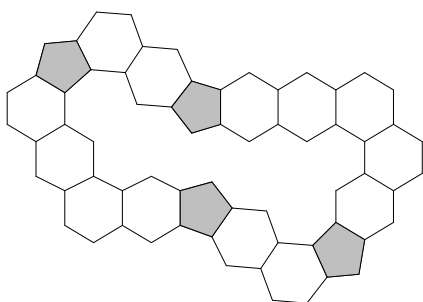

571

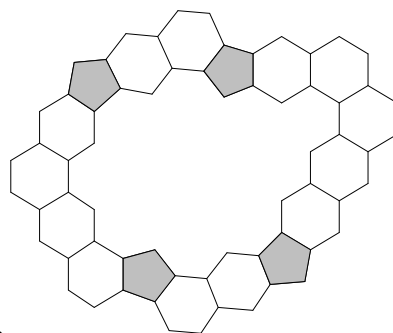

572

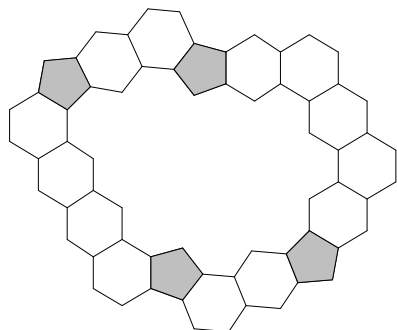

573

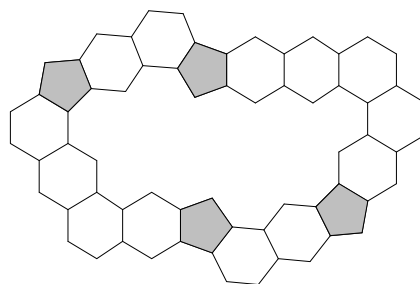

574

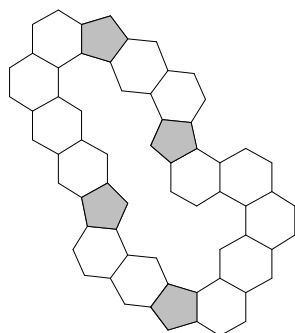

575

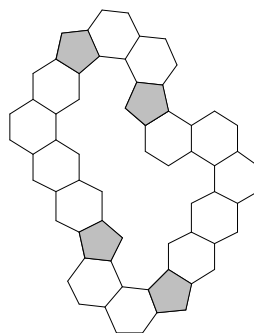

576



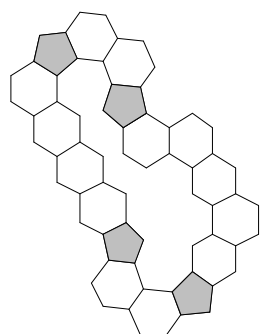

577

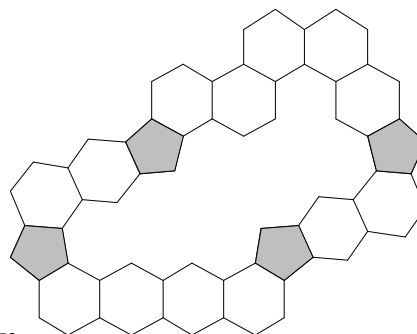

578

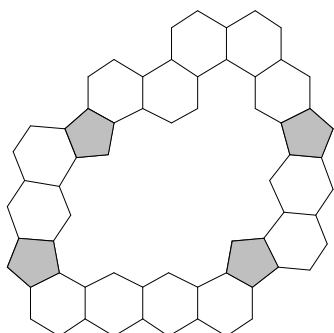

579

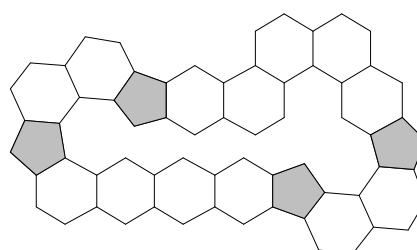

580

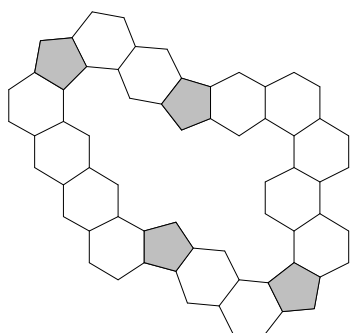

581

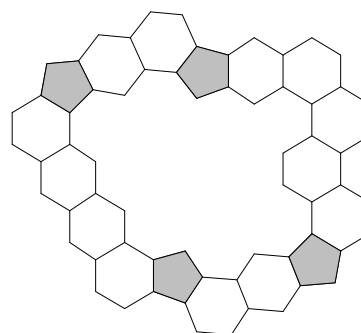

582

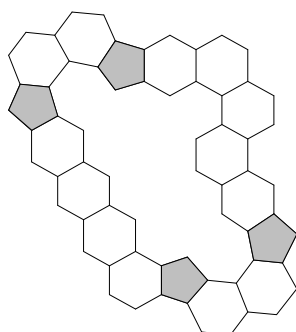

583

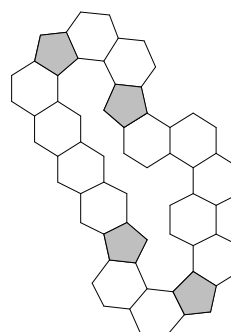

584

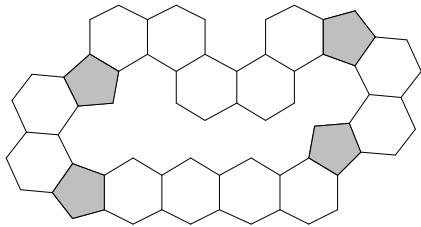

585

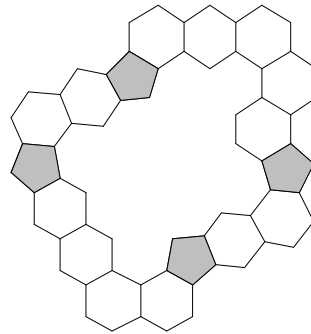

586

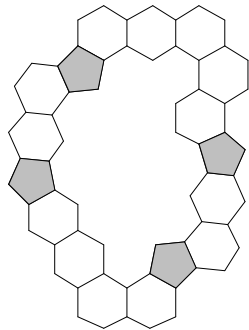

587

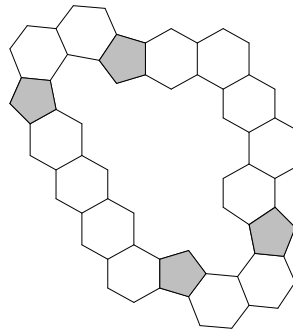

588

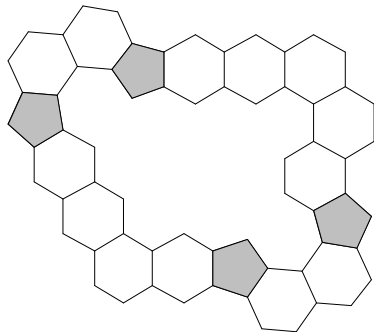

589

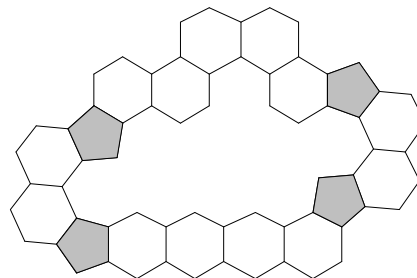

590

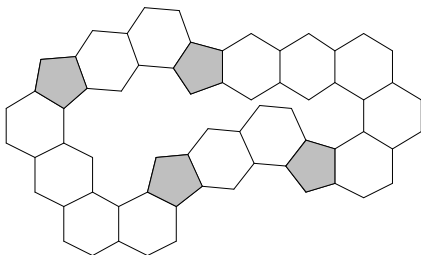

591

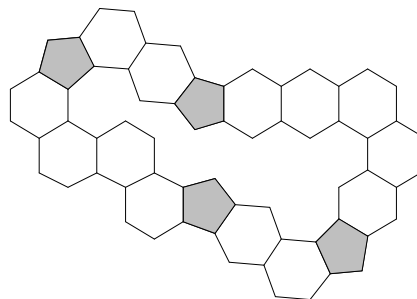

592

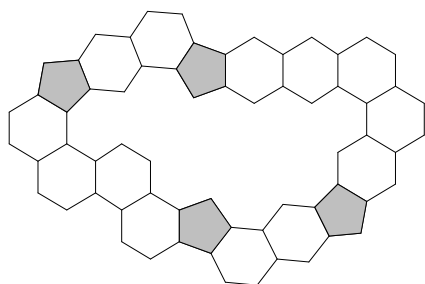

593

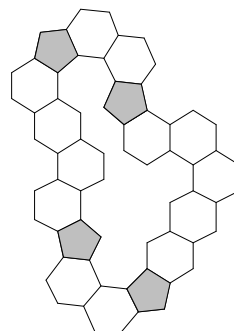

594

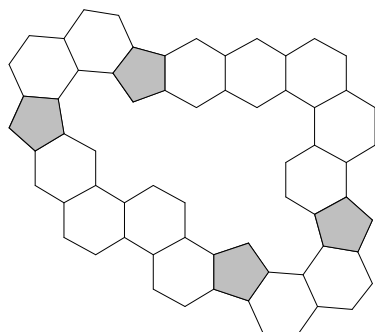

595

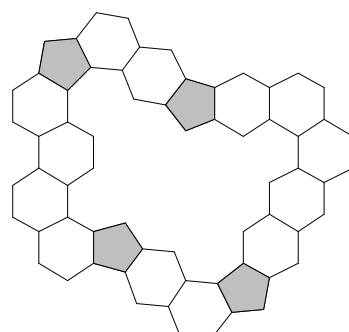

596

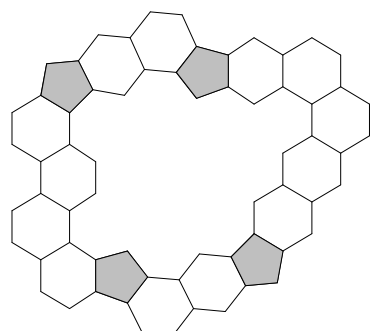

597

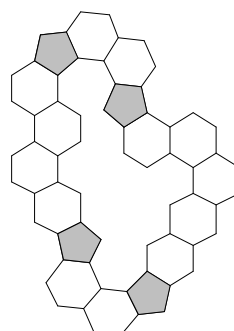

598

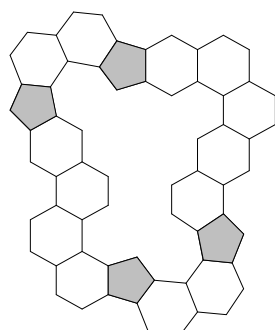

599

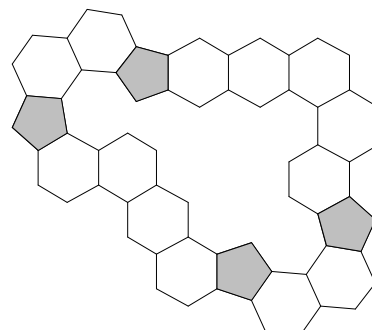

600

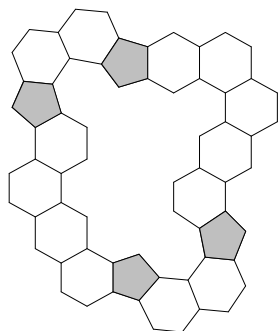

601

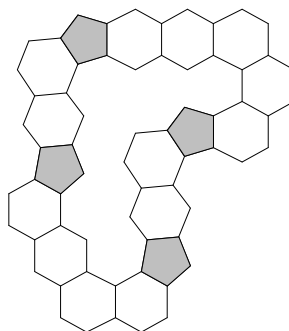

602

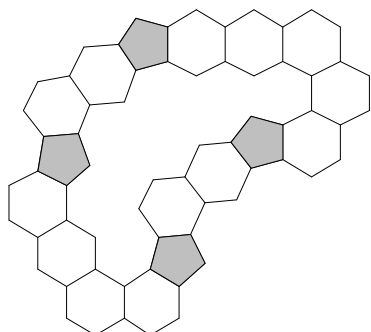

603

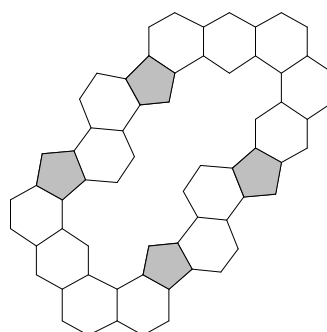

604

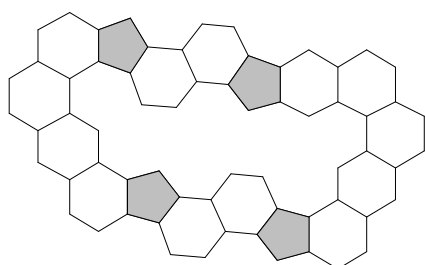

605

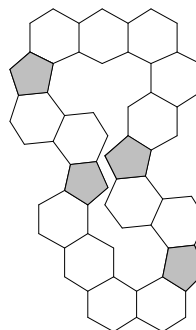

606

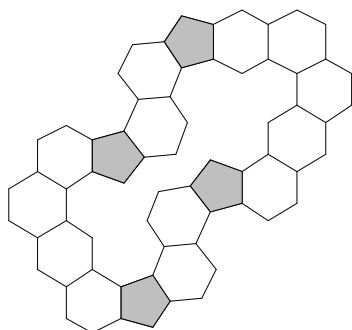

607

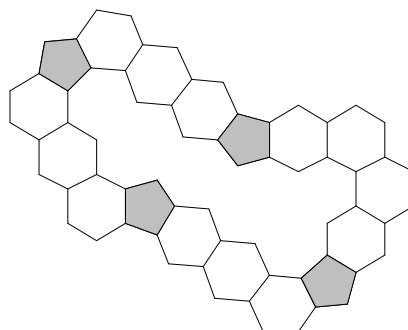

608

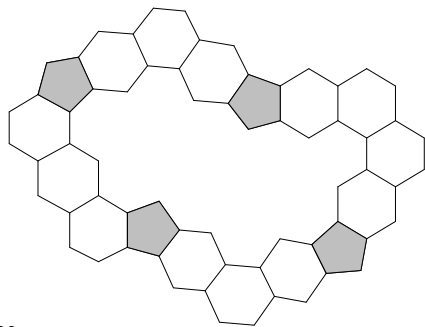

609

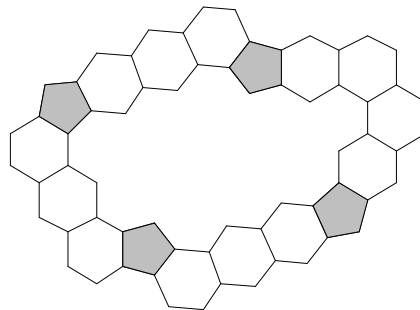

610

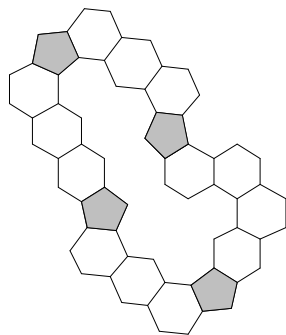

611

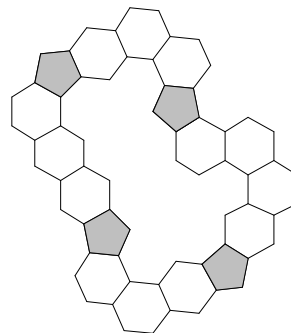

612

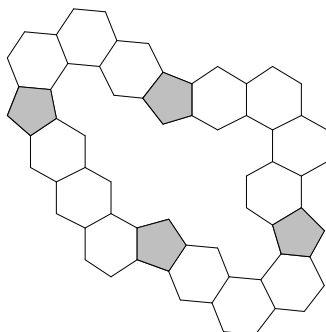

613

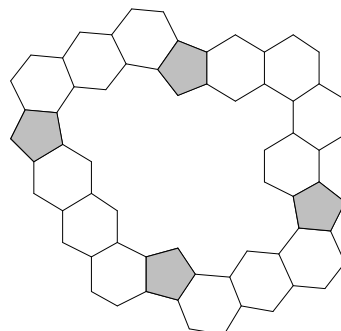

614

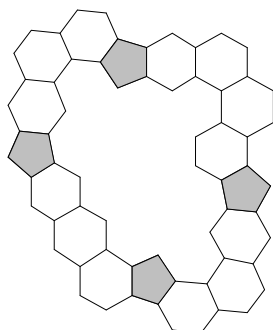

615

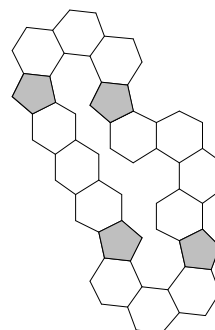

616

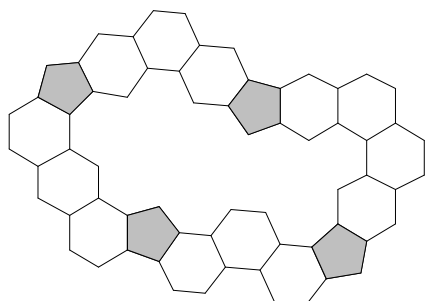

617

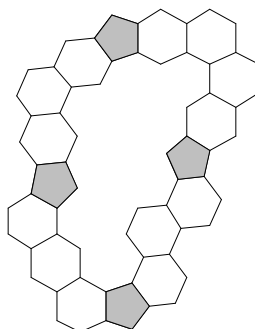

618

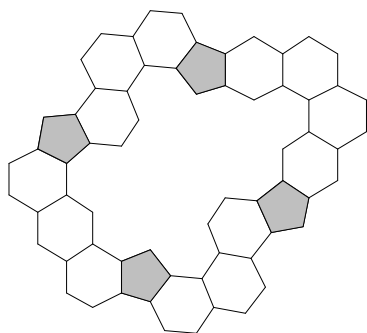

619

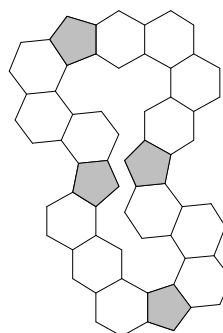

620

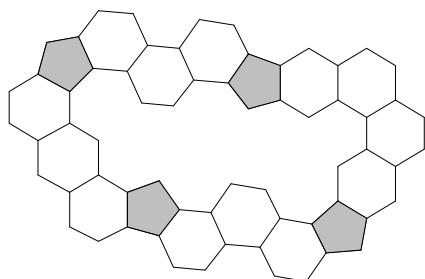

621

Supplement: s1 [file s1]

**Supplement.** Pentahexagonal annuli with 13 rings (3 diagrams).

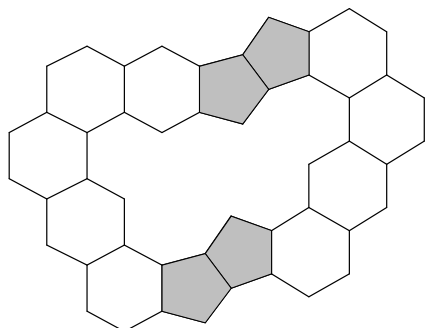

1

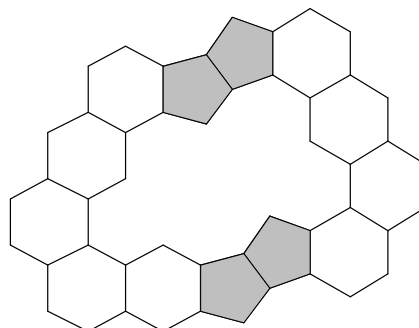

2

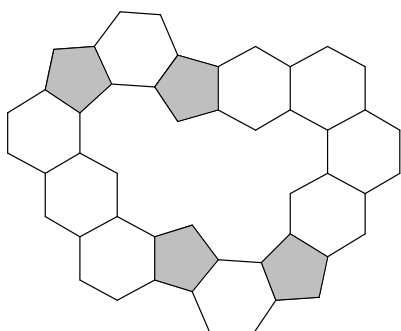

3

Supplement: s1 [file s1]
